# Supplementary material for: Proteomic Analyses of Fibroblast- and Serum-Derived Exosomes Identify QSOX1 as a Marker for Non-invasive Detection of Colorectal Cancer
Source: MDPI journal article supplement (doi:10.3390/cancers13061351), 2021-03-17
Supplement: s1 [file s1]

**Figure 1 A)**

**lanes:** 1: fibroblast cellular protein mix  
 2: pat.1 NF cellular protein  
 3: pat.1 CAF cellular protein  
 4: pat.2 NF cellular protein  
 5: pat.2 CAF cellular protein  
 6: pat.3 NF cellular protein  
 7: pat.3 CAF cellular protein  
 M: Precision Plus Protein All Blue

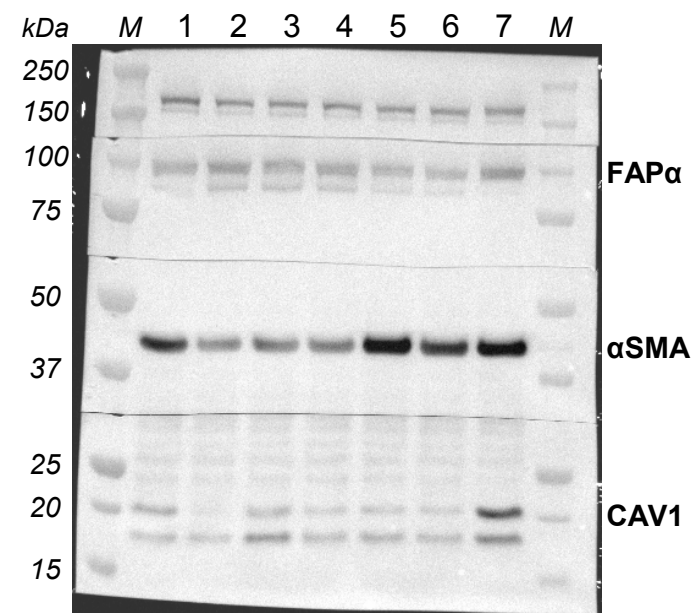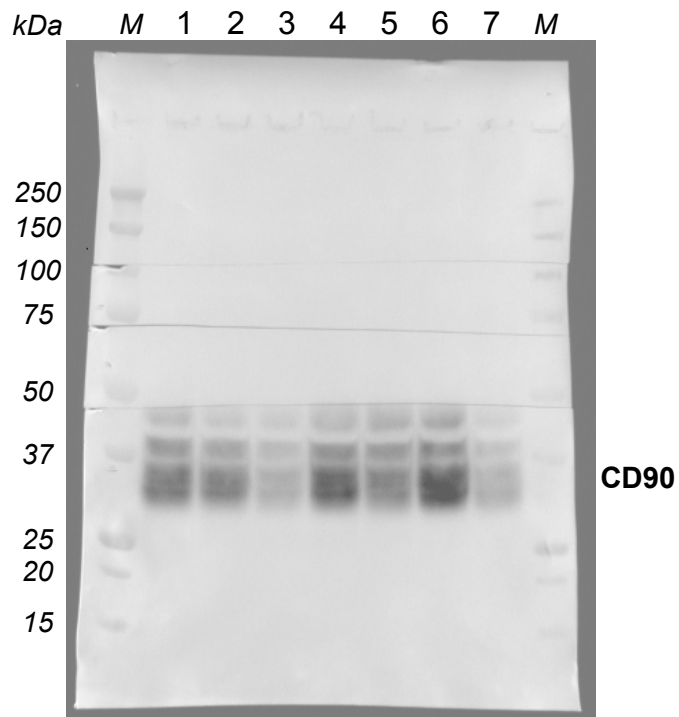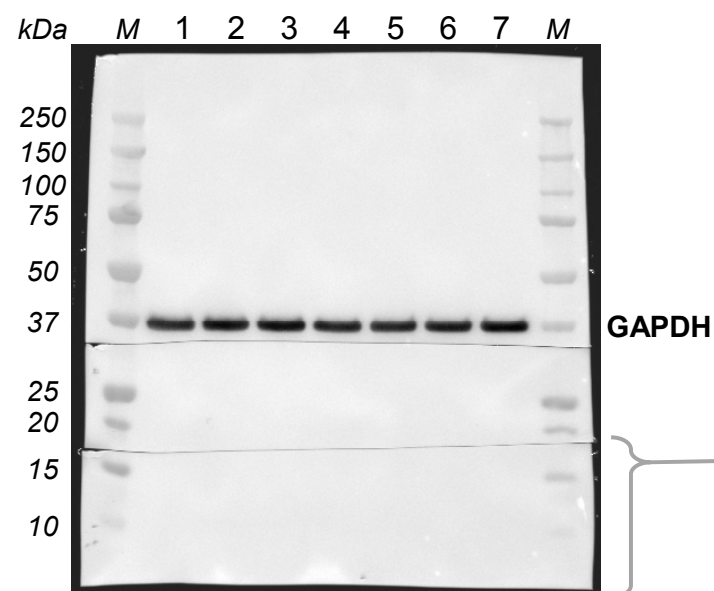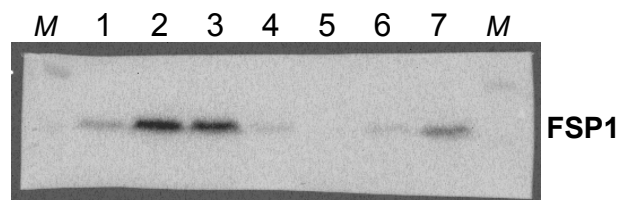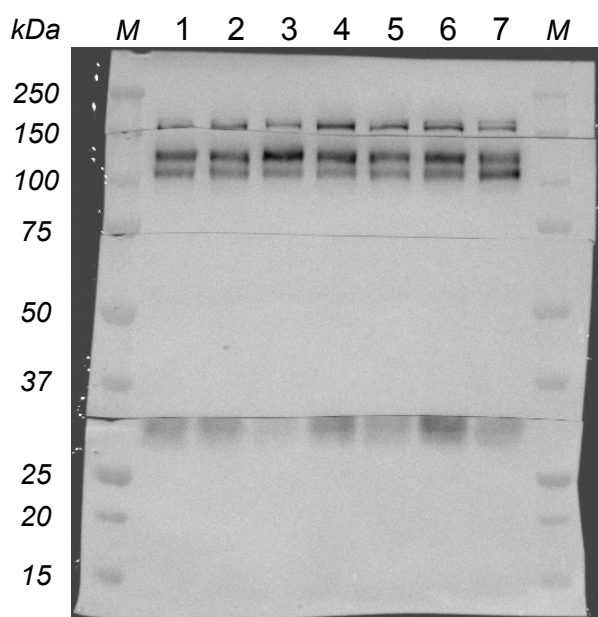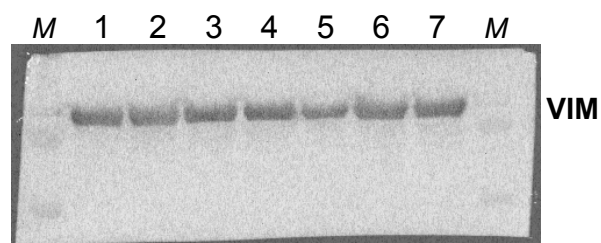

|   | FSP1     | FAPα     | αSMA     | CAV1     | VIM      | CD90     | GAPDH    |
|---|----------|----------|----------|----------|----------|----------|----------|
| 1 | 17416.12 | 33000.17 | 34617.75 | 24446.05 | 53841.48 | 18438.81 | 47265.22 |
| 2 | 54992.07 | 37837.63 | 12908.80 | 7154.27  | 45472.82 | 19977.59 | 49806.17 |
| 3 | 49676.72 | 30070.92 | 16186.63 | 18939.53 | 49094.31 | 11070.33 | 50214.24 |
| 4 | 7985.31  | 34758.46 | 17255.97 | 11749.34 | 47532.77 | 27419.95 | 44307.87 |
| 5 | 3062.19  | 21672.63 | 46067.53 | 14552.29 | 31921.87 | 19970.69 | 43491.97 |
| 6 | 9106.48  | 17889.05 | 34322.34 | 13691.75 | 49671.14 | 30294.37 | 46150.51 |
| 7 | 26844.72 | 39595.95 | 45872.24 | 47146.65 | 48800.43 | 9914.40  | 50155.82 |

**Figure 1 D), part 1**

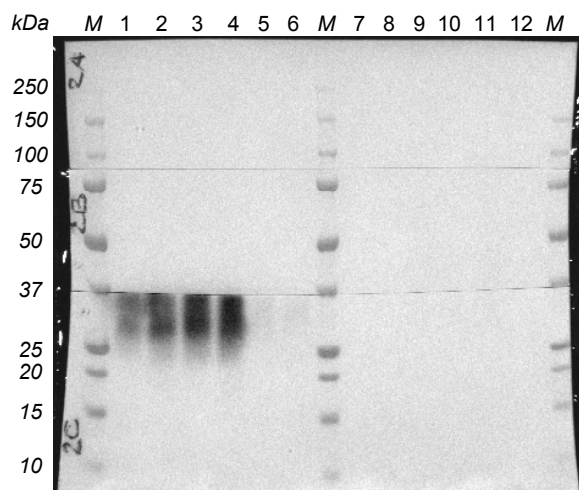

**Calreticulin**

**CD63**

**lanes:** 1: pat.1 NF exosomal protein, n1  
2: pat.1 CAF exosomal protein, n1  
3: pat.2 NF exosomal protein, n1  
4: pat.2 CAF exosomal protein, n1  
5: pat.3 NF exosomal protein, n1  
6: pat.3 CAF exosomal protein, n1  
7: pat.1 NF edp-cM protein, n1  
8: pat.1 CAF edp-cM protein, n1  
9: pat.2 NF edp-cM protein, n1  
10: pat.2 CAF edp-cM protein, n1  
11: pat.3 NF edp-cM protein, n1  
12: pat.3 CAF edp-cM protein, n1  
*M: Precision Plus Protein All Blue*

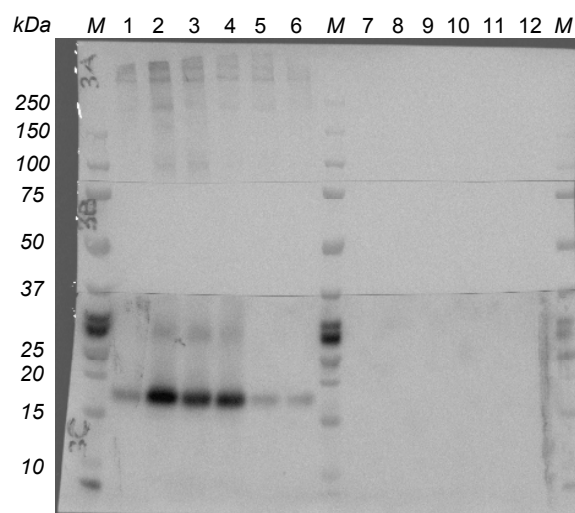

**CD81**

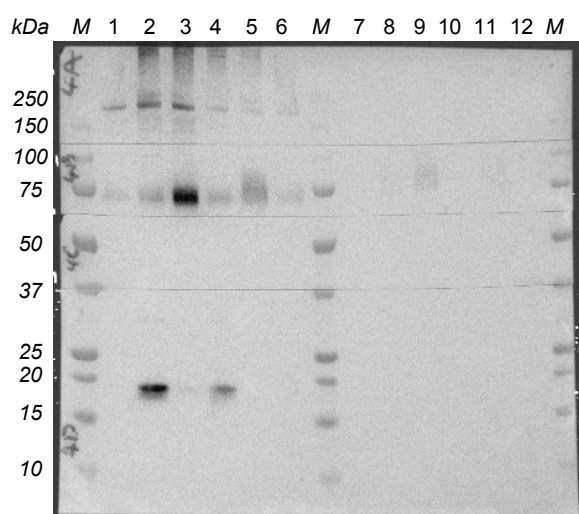

**CD9**

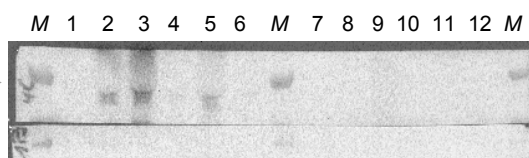

**TSG101**

|    | CD63     | CD81     | TSG101   | Calreticulin |
|----|----------|----------|----------|--------------|
| 1  | 36959.83 | 25056.20 | 10934.61 | 30480.20     |
| 2  | 56581.73 | 66384.32 | 30710.61 | 43454.20     |
| 3  | 61904.02 | 52673.61 | 50975.61 | 36627.20     |
| 4  | 60266.73 | 49457.90 | 11763.61 | 20173.20     |
| 5  | 7935.42  | 12190.08 | 23401.61 | 16389.20     |
| 6  | 5752.54  | 10128.78 | 9051.61  | 20737.20     |
| 7  | 1232.66  | 756.57   | 5617.03  | 16256.90     |
| 8  | 1035.88  | 1197.54  | 7360.32  | 16602.61     |
| 9  | 1826.90  | 944.42   | 13578.32 | 22883.90     |
| 10 | 2350.20  | 1396.54  | 8574.61  | 22122.61     |
| 11 | 2421.25  | 2032.83  | 8932.32  | 16680.90     |
| 12 | 81468.07 | 19710.78 | 9808.32  | 7615.32      |

**Figure 1 D), part 2**

**Figure 1 F), part 1**

lanes: 1: pat.1 NF exosomal protein, n2 7: pat.1 NF exosomal protein, n3  
 2: pat.1 CAF exosomal protein, n2 8: pat.1 CAF exosomal protein, n3  
 3: pat.2 NF exosomal protein, n2 9: pat.2 NF exosomal protein, n3  
 4: pat.2 CAF exosomal protein, n2 10: pat.2 CAF exosomal protein, n3  
 5: pat.3 NF exosomal protein, n2 11: pat.3 NF exosomal protein, n3  
 6: pat.3 CAF exosomal protein, n2 12: pat.3 CAF exosomal protein, n3

M: Precision Plus Protein All Blue

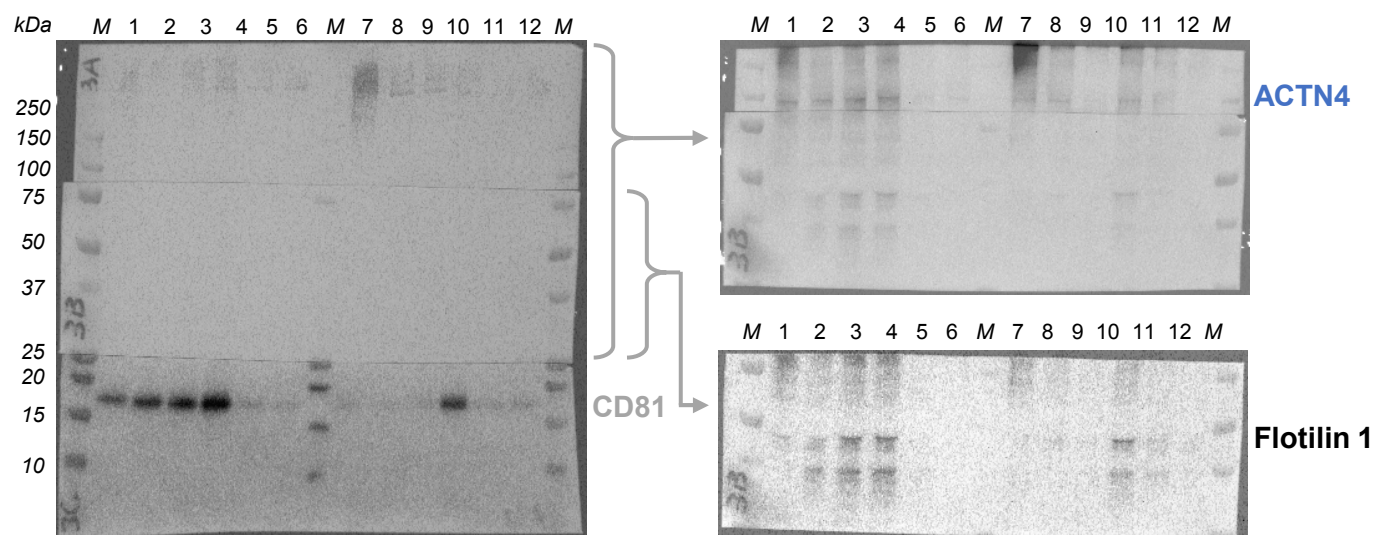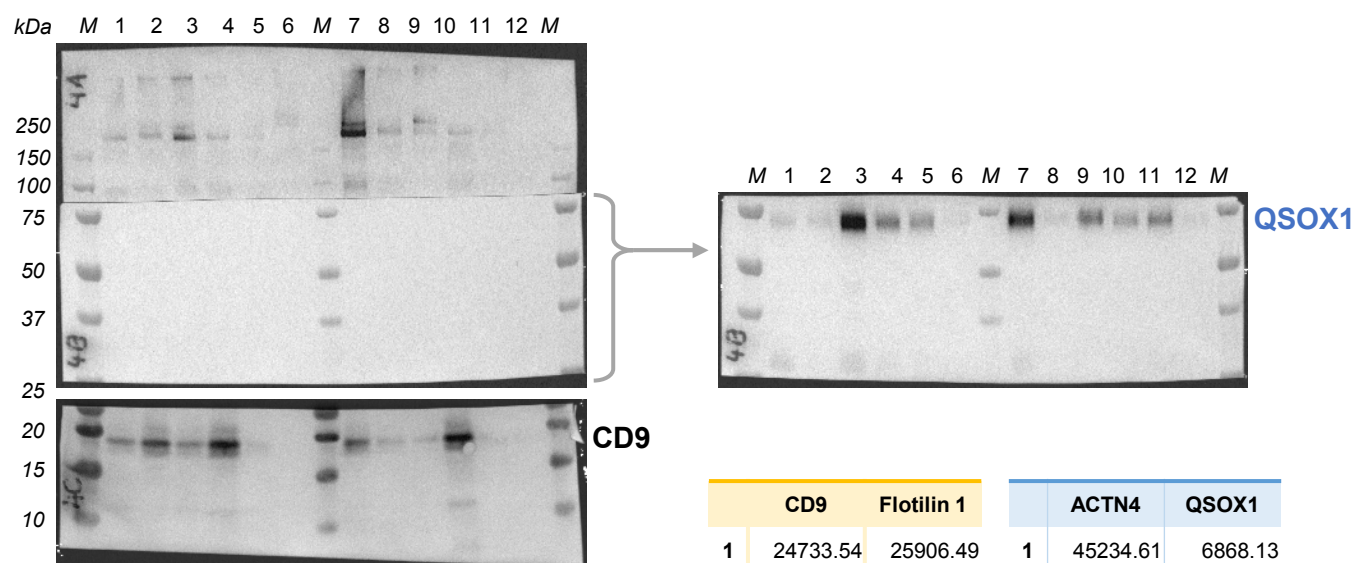

|    | CD9      | Flotilin 1 |    | ACTN4    | QSOX1    |
|----|----------|------------|----|----------|----------|
| 1  | 24733.54 | 25906.49   | 1  | 45234.61 | 6868.13  |
| 2  | 46243.27 | 28760.49   | 2  | 37775.37 | 7263.49  |
| 3  | 23606.71 | 48845.49   | 3  | 52371.37 | 59627.27 |
| 4  | 64208.10 | 47657.78   | 4  | 51383.32 | 26656.37 |
| 5  | 6217.25  | 11383.78   | 5  | 11247.78 | 18928.66 |
| 6  | 2483.00  | 7232.49    | 6  | 8383.782 | 4942.20  |
| 7  | 35360.08 | 19716.49   | 7  | 38609.15 | 48594.68 |
| 8  | 13539.37 | 23794.78   | 8  | 26345.15 | 8241.30  |
| 9  | 12936.13 | 22939.20   | 9  | 10051.08 | 27771.02 |
| 10 | 63118.27 | 47619.49   | 10 | 29161.44 | 17984.37 |
| 11 | 7750.08  | 35078.78   | 11 | 15656.08 | 24756.02 |
| 12 | 2203.25  | 30364.29   | 12 | 4393.468 | 6404.125 |



Figure 1 F), part 2

Figure 1 G)

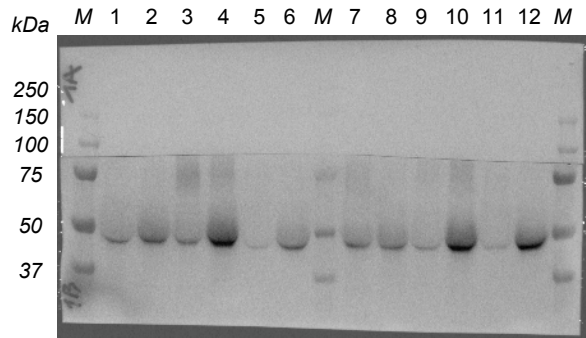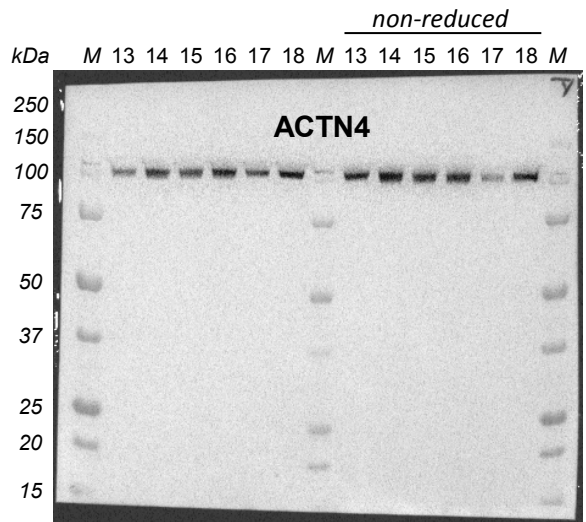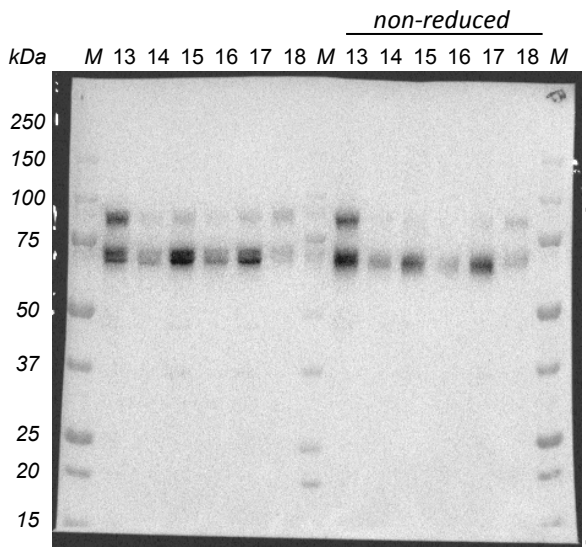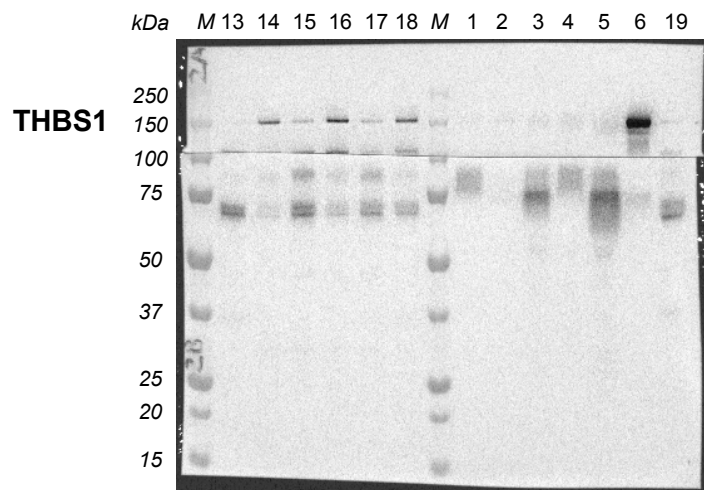

lanes: 1: pat.1 NF exosomal protein, n2  
2: pat.1 CAF exosomal protein, n2  
3: pat.2 NF exosomal protein, n2  
4: pat.2 CAF exosomal protein, n2  
5: pat.3 NF exosomal protein, n2  
6: pat.3 CAF exosomal protein, n2  
7: pat.1 NF exosomal protein, n3  
8: pat.1 CAF exosomal protein, n3  
9: pat.2 NF exosomal protein, n3  
10: pat.2 CAF exosomal protein, n3  
11: pat.3 NF exosomal protein, n3  
12: pat.3 CAF exosomal protein, n3  
M: Precision Plus Protein All Blue  
13: pat.1 NF cellular protein  
14: pat.1 CAF cellular protein  
15: pat.2 NF cellular protein  
16: pat.2 CAF cellular protein  
17: pat.3 NF cellular protein  
18: pat.3 CAF cellular protein  
19: fibroblast cellular protein mix

EDIL3

|    | ACTN4    | QSOX1    | EDIL3    | EDIL3 |
|----|----------|----------|----------|-------|
| 13 | 12133.42 | 22148.05 | 2902.65  | 1     |
| 14 | 21267.14 | 10786.61 | 2960.33  | 2     |
| 15 | 19221.03 | 28061.88 | 2652.70  | 3     |
| 16 | 25268.77 | 12684.65 | 2850.64  | 4     |
| 17 | 17051.72 | 20572.07 | 3301.12  | 5     |
| 18 | 25616.72 | 4341.67  | 3648.91  | 6     |
| 13 | 20565.78 | 26128.49 | 5792.83  | 7     |
| 14 | 26968.32 | 9281.13  | 19759.73 | 8     |
| 15 | 23201.90 | 16114.02 | 13271.95 | 9     |
| 16 | 25215.02 | 5531.25  | 19753.61 | 10    |
| 17 | 9990.83  | 18899.85 | 12052.25 | 11    |
| 18 | 23960.80 | 5435.83  | 26223.49 | 12    |

|    | THBS1    | GAPDH   |
|----|----------|---------|
| 1  | 3026.35  | 2727.35 |
| 2  | 3376.88  | 1341.64 |
| 3  | 6248.83  | 702.52  |
| 4  | 11821.66 | 1525.64 |
| 5  | 18339.49 | 1795.93 |
| 6  | 24858.54 | 2190.35 |
| 19 | 2844.88  | 4238.35 |

|    | THBS1    | GAPDH    |
|----|----------|----------|
| 13 | 4817.22  | 27417.27 |
| 14 | 16087.95 | 29764.49 |
| 15 | 6607.95  | 32180.73 |
| 16 | 23406.32 | 30437.49 |
| 17 | 6718.66  | 31664.08 |
| 18 | 18829.15 | 28246.02 |

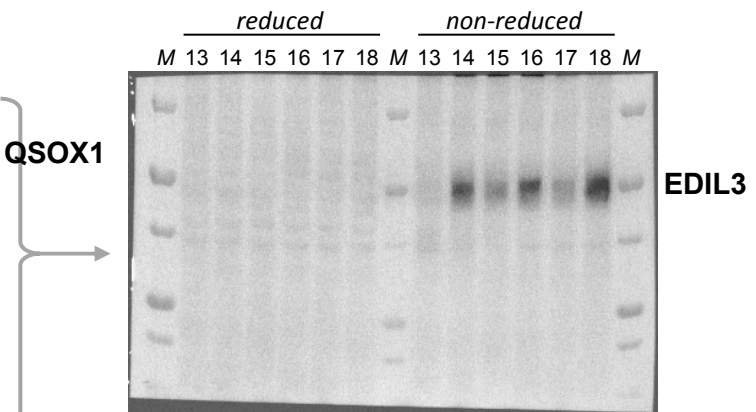

QSOX1

EDIL3

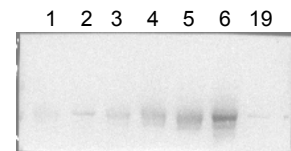

THBS1

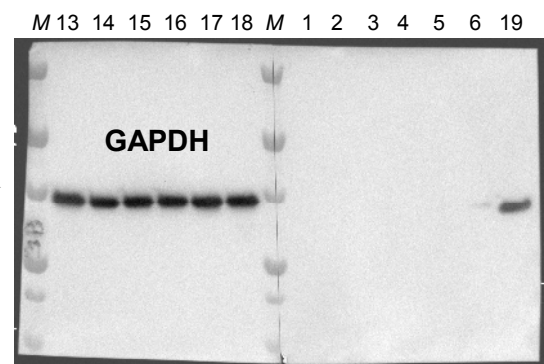

GAPDH

**Figure 2 B), part 1**

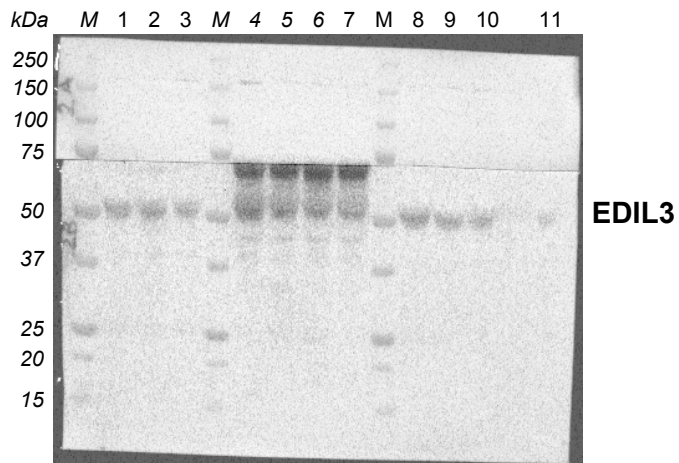

**lanes:** 1: pat.1 wp protein  
2: pat.2 wP protein  
3: pat.3 wP protein  
4: pEXO protein mix  
5: pat.1 pEXO protein  
6: pat.2 pEXO protein  
7: pat.3 pEXO protein  
8: edP protein mix  
9: pat.1 edP protein  
10: pat.2 edP protein  
11: pat.3 edP protein  
M: *Precision Plus Protein All Blue*

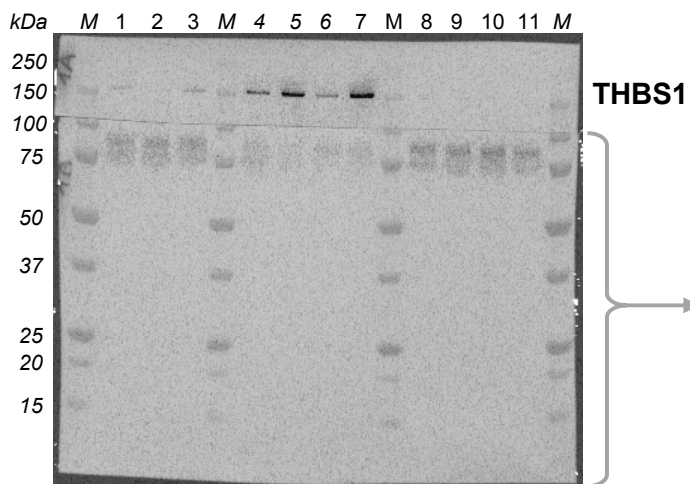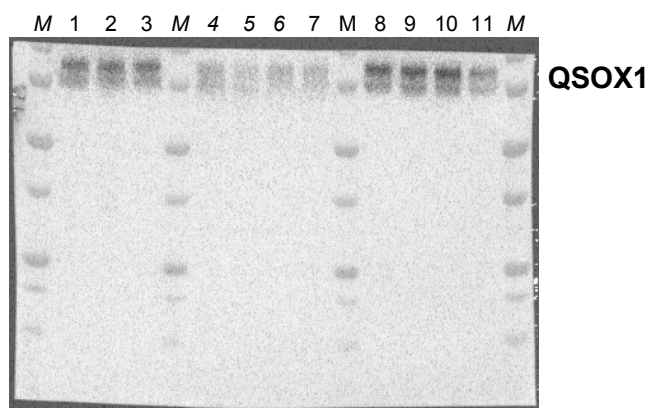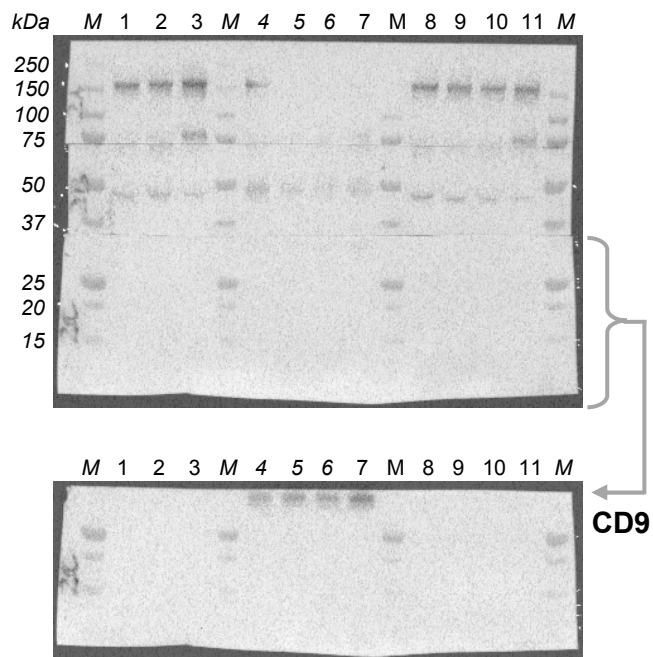

|    | THBS1    | QSOX1    | EDIL3    | CD9      |
|----|----------|----------|----------|----------|
| 1  | 6708.02  | 49754.85 | 29675.78 | 5605.08  |
| 2  | 5140.92  | 51902.73 | 32339.85 | 4994.08  |
| 3  | 8739.66  | 47885.02 | 21788.95 | 5752.73  |
| 4  | 22901.08 | 29113.90 | 68299.68 | 30799.95 |
| 5  | 43962.61 | 16035.54 | 52831.78 | 37625.20 |
| 6  | 17473.54 | 20214.20 | 49948.61 | 34799.83 |
| 7  | 53686.27 | 20652.44 | 45097.15 | 49826.08 |
| 8  | 2648.21  | 53393.73 | 31840.73 | 5084.66  |
| 9  | 2998.33  | 57928.49 | 22585.66 | 6210.15  |
| 10 | 3850.30  | 57781.90 | 21973.73 | 5616.13  |
| 11 | 3366.05  | 34354.02 | 8892.61  | 4485.52  |



**Figure 2 B), part 2**

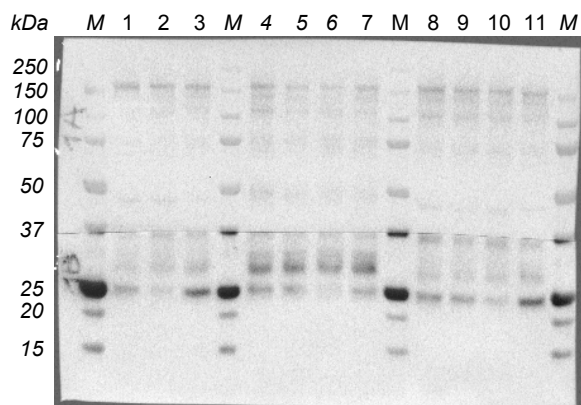

**Flotilin 1**

**CD63**

**lanes:** 1: pat.1 wp protein  
2: pat.2 wp protein  
3: pat.3 wp protein  
4: pEXO protein mix  
5: pat.1 pEXO protein  
6: pat.2 pEXO protein  
7: pat.3 pEXO protein  
8: edP protein mix  
9: pat.1 edP protein  
10: pat.2 edP protein  
11: pat.3 edP protein  
M: *Precision Plus Protein All Blue*

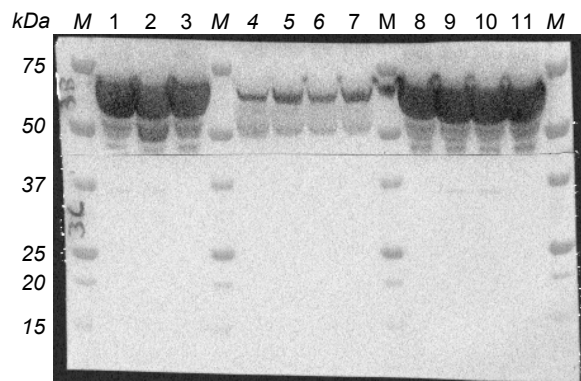

**Albumin**

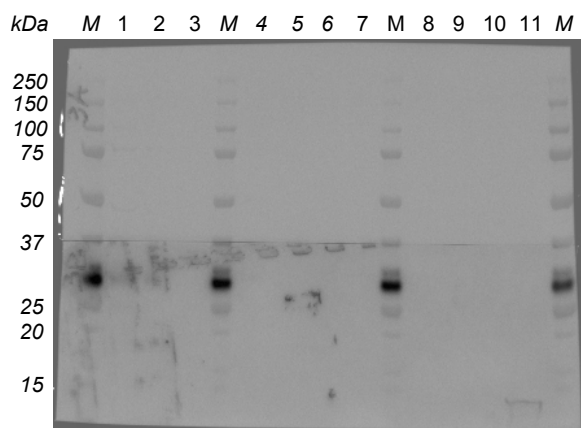

**Calreticulin**

|    | Flotilin 1 | CD63     | Albumin  | Calreticulin |
|----|------------|----------|----------|--------------|
| 1  | 17163.18   | 17000.37 | 67353.73 | 31765.25     |
| 2  | 19027.44   | 20010.20 | 66654.15 | 31109.61     |
| 3  | 12883.25   | 23884.27 | 60795.27 | 27630.20     |
| 4  | 49679.90   | 50990.78 | 20462.61 | 46064.66     |
| 5  | 26250.20   | 44864.49 | 23509.32 | 33481.66     |
| 6  | 25469.37   | 36617.78 | 17855.66 | 31060.37     |
| 7  | 28701.90   | 50824.61 | 24218.15 | 29822.73     |
| 8  | 23586.49   | 18740.73 | 73733.68 | 18857.97     |
| 9  | 16782.49   | 13585.08 | 71653.20 | 7455.66      |
| 10 | 21907.66   | 15512.66 | 72867.15 | 14933.37     |
| 11 | 15969.08   | 20166.54 | 68492.78 | 24199.83     |

**Figure 4 A)**

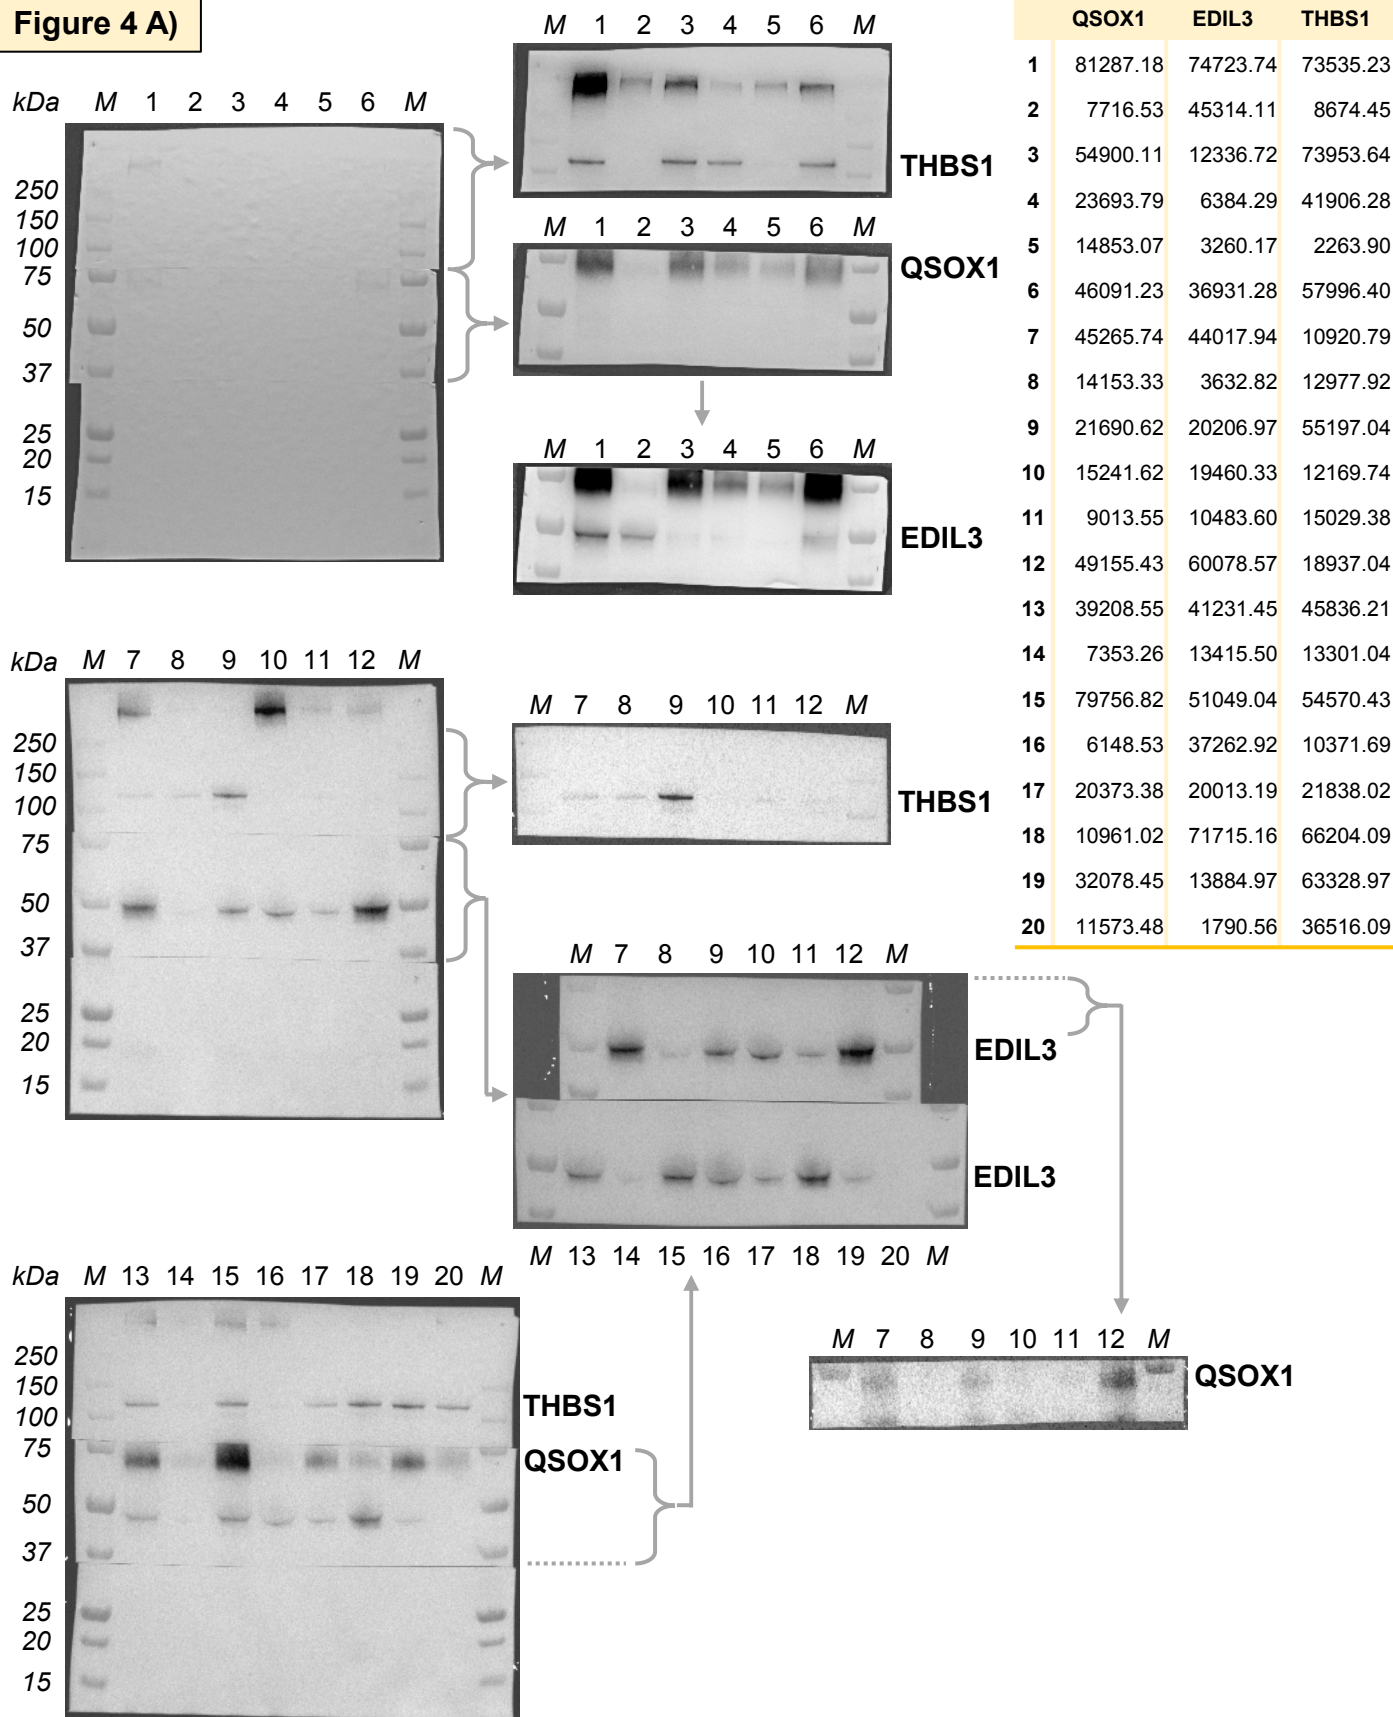

**lanes:**

|                               |                                 |                                 |
|-------------------------------|---------------------------------|---------------------------------|
| 1: pat.4 NF exosomal protein  | 7: pat.7 NF exosomal protein    | 13: pat.8 NF exosomal protein   |
| 2: pat.4 CAF exosomal protein | 8: pat.7 CAF exosomal protein   | 14: pat.8 CAF exosomal protein  |
| 3: pat.5 NF exosomal protein  | 9: pat.9 NF exosomal protein    | 15: pat.11 NF exosomal protein  |
| 4: pat.5 CAF exosomal protein | 10: pat.9 CAF exosomal protein  | 16: pat.11 CAF exosomal protein |
| 5: pat.6 NF exosomal protein  | 11: pat.10 NF exosomal protein  | 17: pat.12 NF exosomal protein  |
| 6: pat.6 CAF exosomal protein | 12: pat.10 CAF exosomal protein | 18: pat.12 CAF exosomal protein |
|                               |                                 | 19: pat.13 NF exosomal protein  |
|                               |                                 | 20: pat.13 CAF exosomal protein |

*M: Precision Plus Protein All Blue*

**Figure 4 B), part 1**

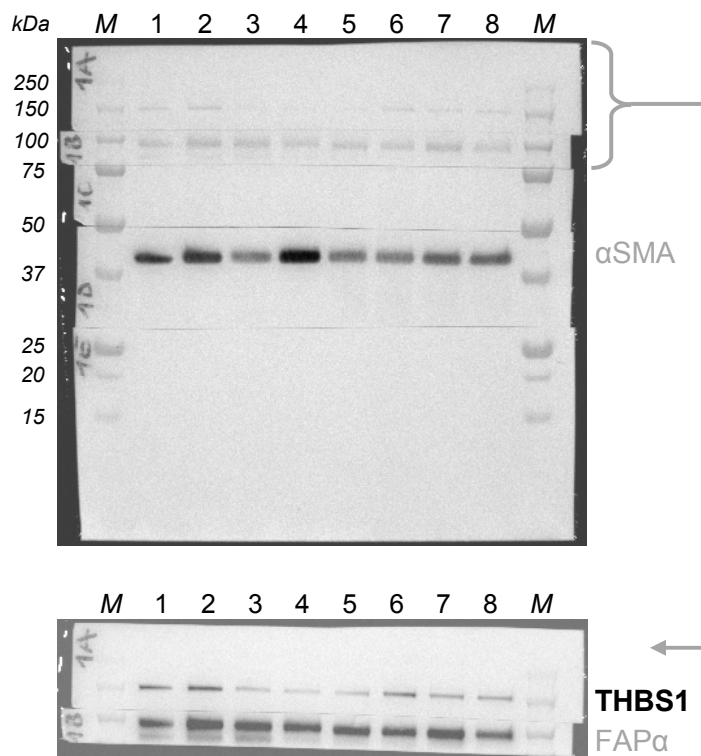

**lanes:** 1: fibroblast cellular protein mix (1)  
2: fibroblast cellular protein mix (2)  
3: pat.4 NF cellular protein  
4: pat.4 CAF cellular protein  
5: pat.5 NF cellular protein  
6: pat.5 CAF cellular protein  
7: pat.6 NF cellular protein  
8: pat.6 CAF cellular protein

**M:** Precision Plus Protein All Blue

9: pat.7 NF cellular protein  
10: pat.7 CAF cellular protein  
11: pat.9 NF cellular protein  
12: pat.9 CAF cellular protein  
13: pat.10 NF cellular protein  
14: pat.10 CAF cellular protein

15: pat.8 NF cellular protein  
16: pat.8 CAF cellular protein  
17: pat.11 NF cellular protein  
18: pat.11 CAF cellular protein  
19: pat.12 NF cellular protein  
20: pat.12 CAF cellular protein  
21: pat.13 NF<sub>1</sub> cellular protein  
22: pat.13 CAF cellular protein  
23: pat.13 NF<sub>2</sub> cellular protein

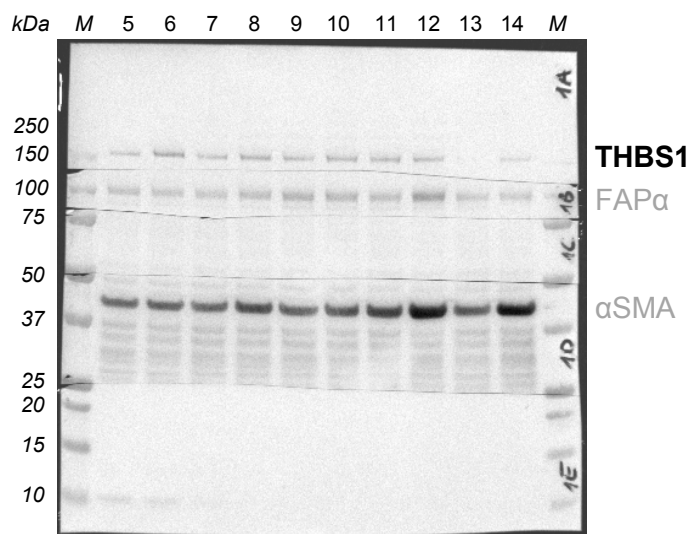

|    | THBS1    | THBS1    |
|----|----------|----------|
| 1  | 38185.80 |          |
| 2  | 49143.23 |          |
| 3  | 18509.70 |          |
| 4  | 10672.02 |          |
| 5  | 15050.77 | 22699.29 |
| 6  | 38096.36 | 42996.06 |
| 7  | 32380.77 | 29795.94 |
| 8  | 36080.07 | 40530.53 |
| 9  |          | 32386.17 |
| 10 |          | 37391.82 |
| 11 |          | 36317.12 |
| 12 |          | 31221.70 |
| 13 |          | 4150.22  |
| 14 |          | 11997.58 |
| 15 | 31011.82 |          |
| 16 | 50634.36 |          |
| 17 | 39969.53 |          |
| 18 | 54562.48 |          |
| 19 | 30081.70 |          |
| 20 | 18053.65 |          |
| 21 | 5370.58  |          |
| 22 | 24835.46 |          |
| 23 | 31583.11 |          |

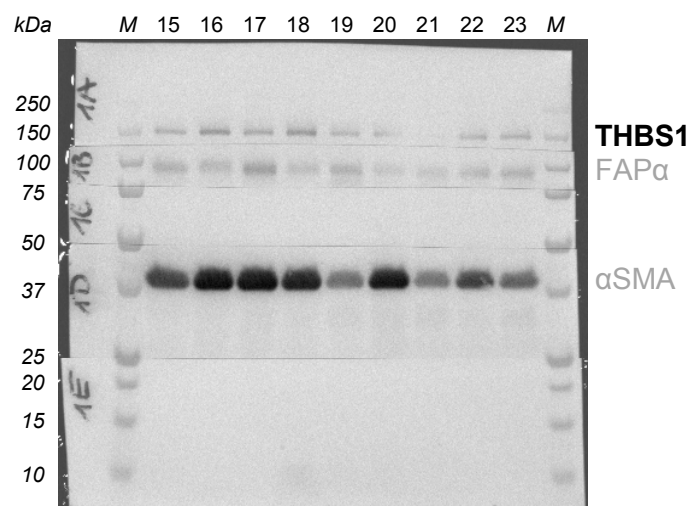



**Figure 4 B), part 2**

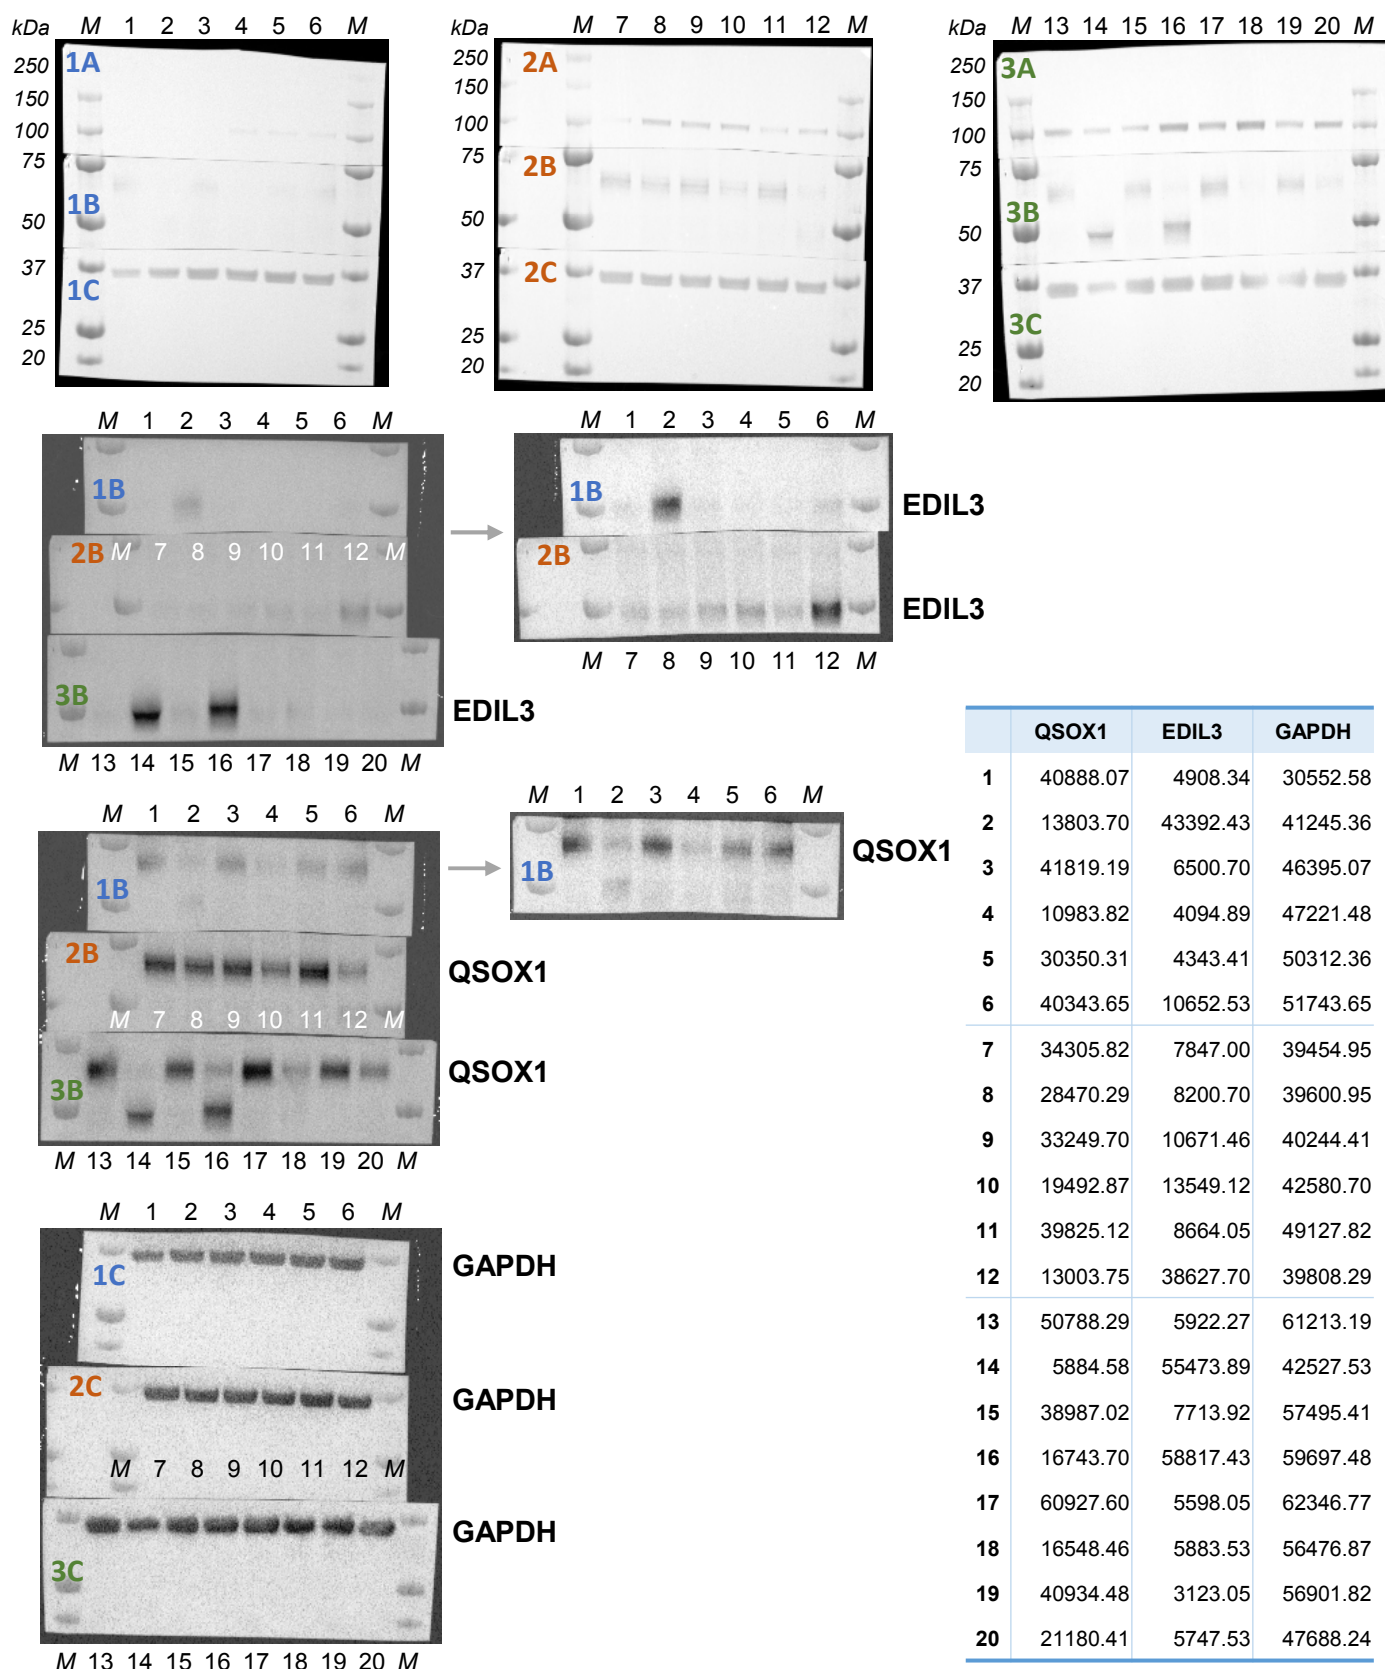

**lanes:** 1: pat.4 NF cellular protein  
2: pat.4 CAF cellular protein  
3: pat.5 NF cellular protein  
4: pat.5 CAF cellular protein  
5: pat.6 NF cellular protein  
6: pat.6 CAF cellular protein

7: pat.7 NF cellular protein  
8: pat.7 CAF cellular protein  
9: pat.9 NF cellular protein  
10: pat.9 CAF cellular protein  
11: pat.10 NF cellular protein  
12: pat.10 CAF cellular protein

13: pat.8 NF cellular protein  
14: pat.8 CAF cellular protein  
15: pat.11 NF cellular protein  
16: pat.11 CAF cellular protein  
17: pat.12 NF cellular protein  
18: pat.12 CAF cellular protein  
19: pat.13 NF cellular protein  
20: pat.13 CAF cellular protein

*M: Precision Plus Protein All Blue*

**Figure S5 A), part 1**

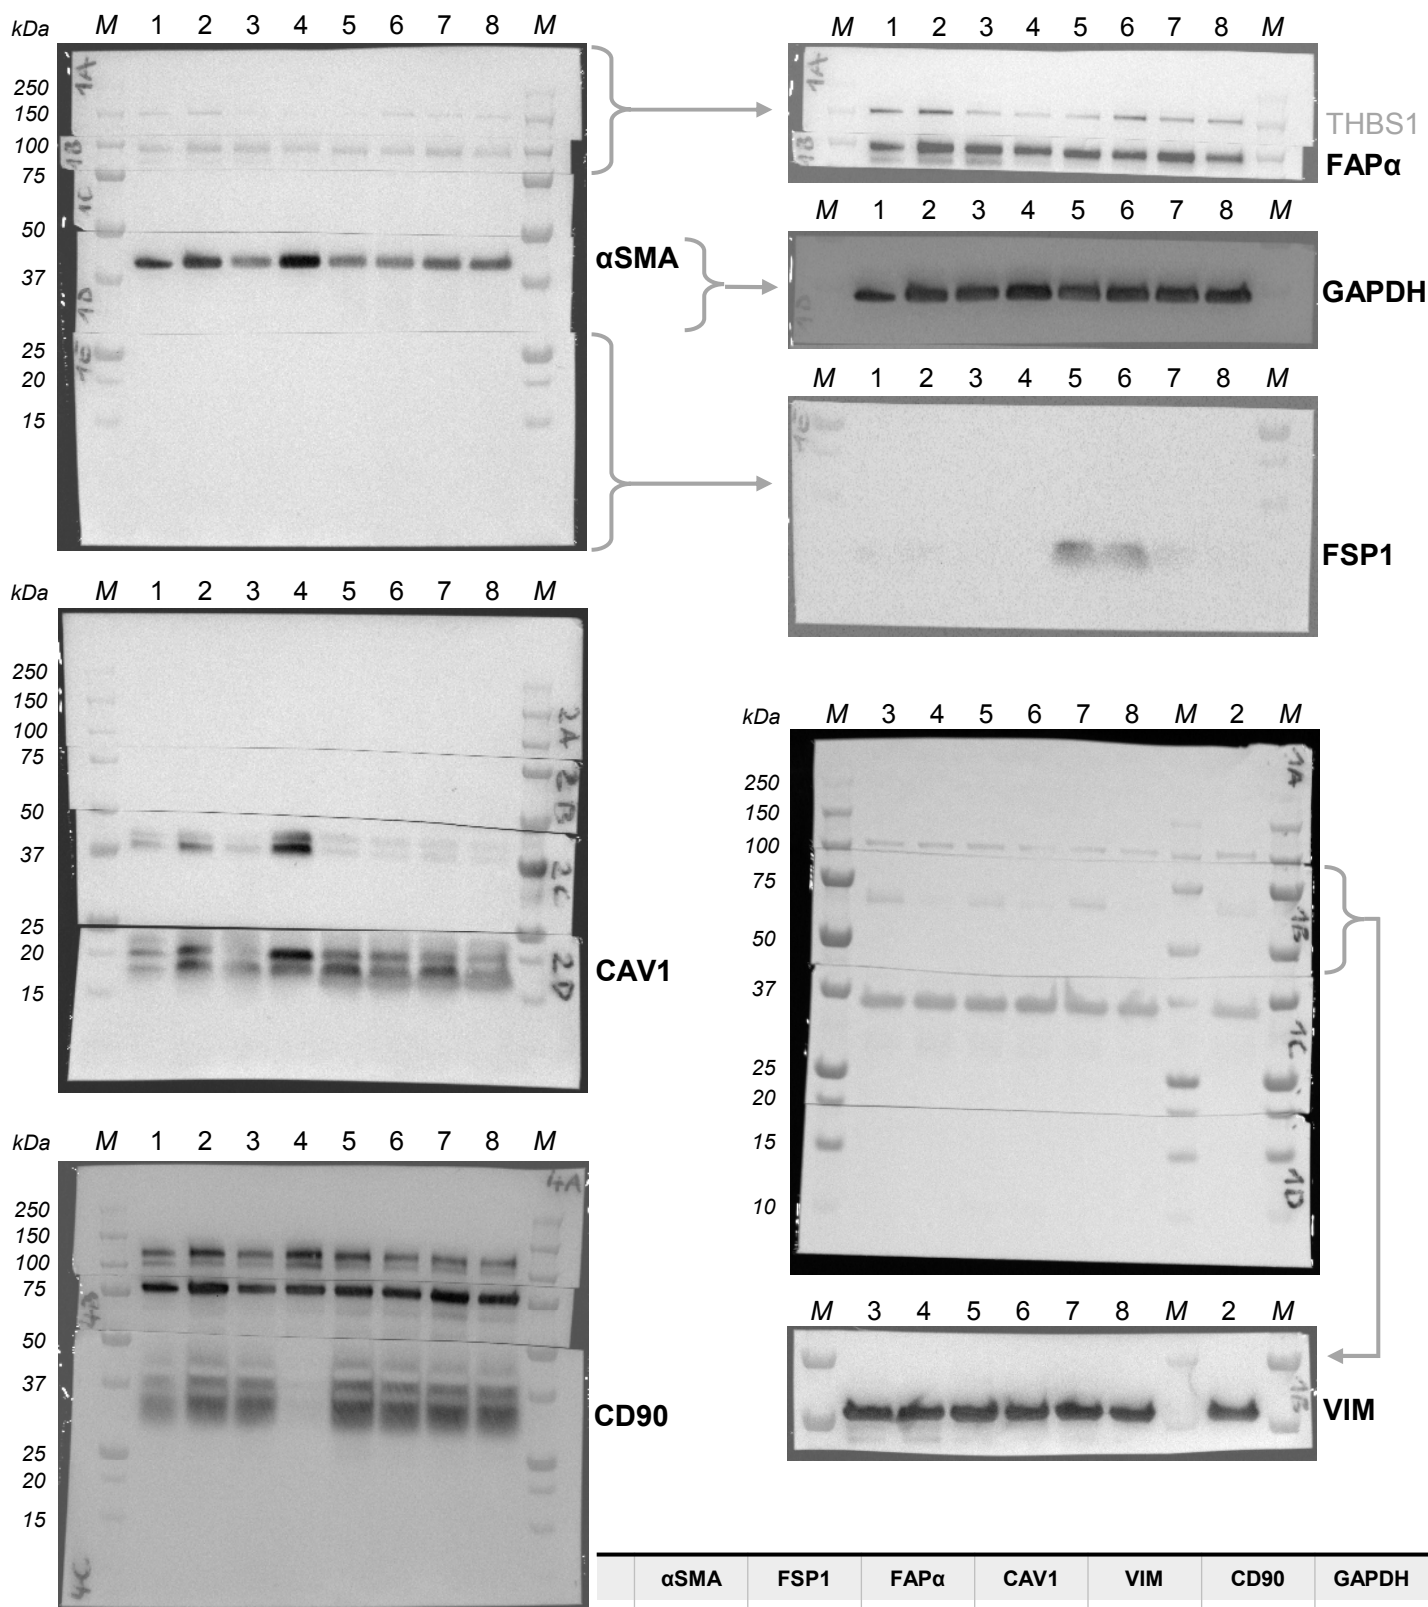

**lanes:**

- 1: fibroblast cellular protein mix (1)
- 2: fibroblast cellular protein mix (2)
- 3: pat.4 NF cellular protein
- 4: pat.4 CAF cellular protein
- 5: pat.5 NF cellular protein
- 6: pat.5 CAF cellular protein
- 7: pat.6 NF cellular protein
- 8: pat.6 CAF cellular protein

**M:** Precision Plus Protein All Blue

|   | αSMA     | FSP1     | FAPα     | CAV1     | VIM      | CD90     | GAPDH    |
|---|----------|----------|----------|----------|----------|----------|----------|
| 1 | 31074.83 | 5775.24  | 32411.75 | 22640.60 | -        | 22827.66 | 32899.26 |
| 2 | 39742.50 | 7046.48  | 55195.94 | 43617.67 | 53355.38 | 45769.07 | 45321.51 |
| 3 | 20205.41 | 3718.36  | 48276.65 | 18268.58 | 62223.48 | 40567.77 | 43296.36 |
| 4 | 53834.02 | 3637.67  | 36672.65 | 76930.67 | 62471.70 | 1053.66  | 58886.02 |
| 5 | 21368.53 | 51571.02 | 36742.19 | 43961.82 | 63988.65 | 57631.77 | 40781.82 |
| 6 | 19289.41 | 41950.65 | 31961.58 | 39417.19 | 59624.87 | 49969.70 | 47673.95 |
| 7 | 26853.24 | 14466.43 | 45790.65 | 36654.36 | 65548.65 | 56107.48 | 46684.24 |
| 8 | 29281.14 | 6758.72  | 27748.24 | 28990.84 | 53278.65 | 52520.19 | 49553.43 |

**Figure S5 A), part 2**

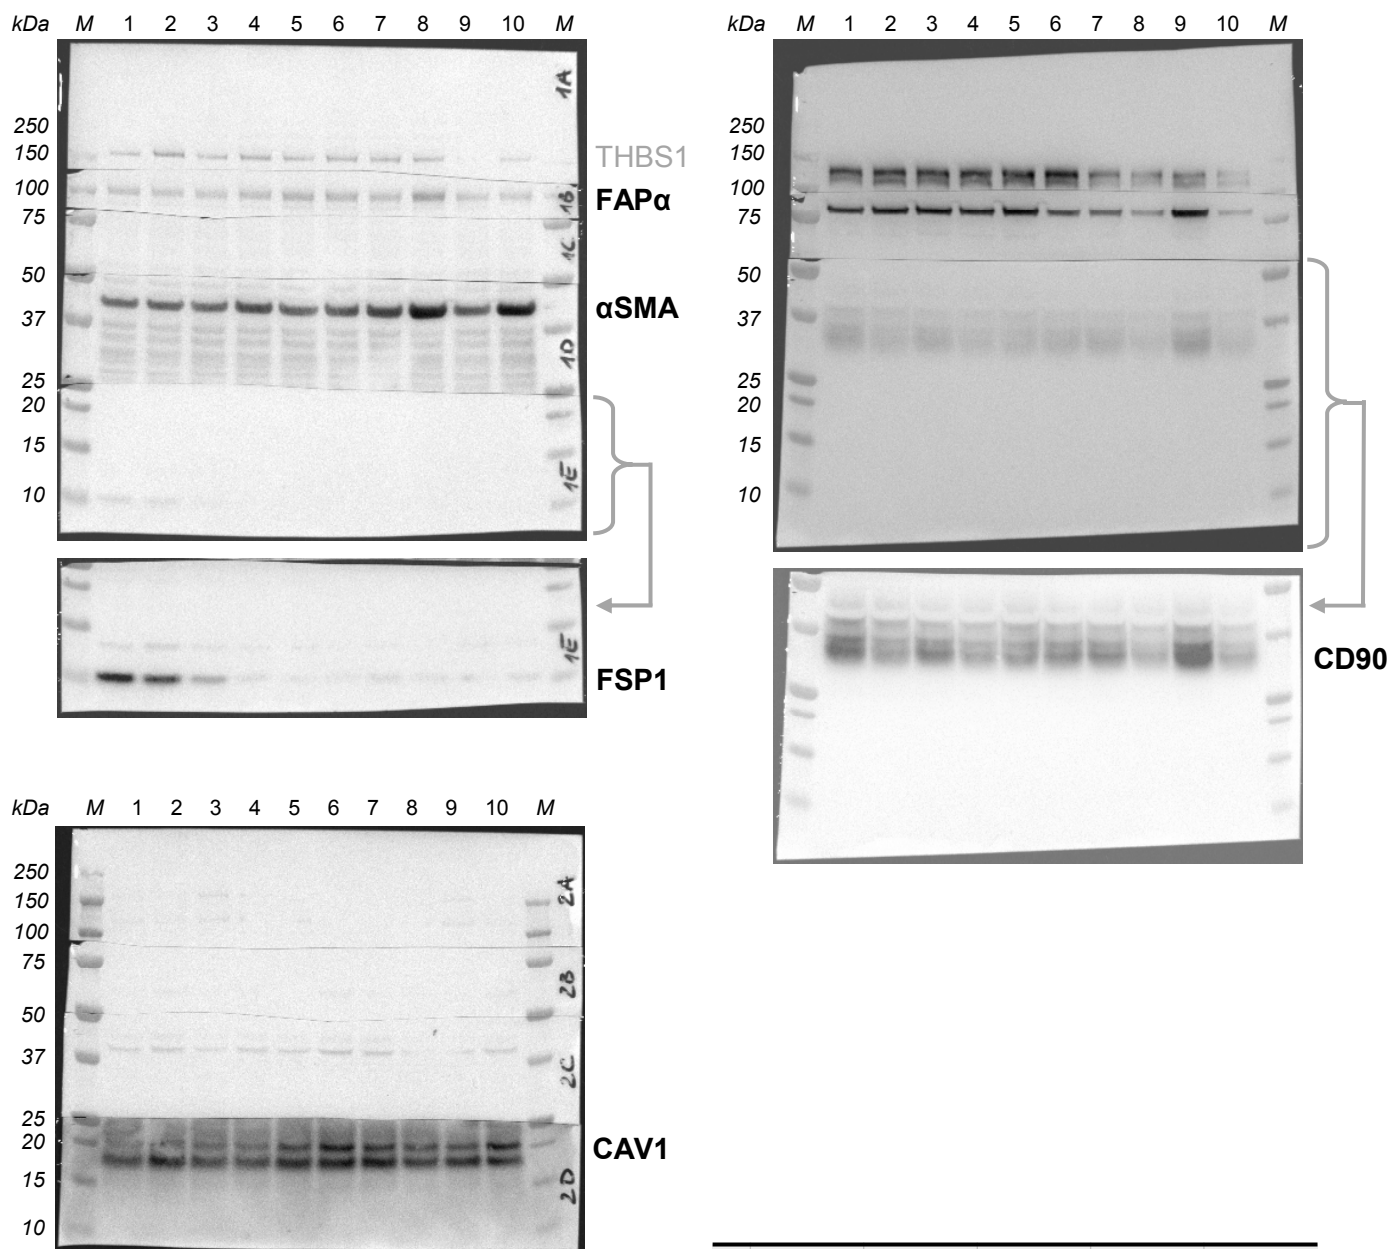

**lanes:**

- 1: pat.5 NF cellular protein
- 2: pat.5 CAF cellular protein
- 3: pat.6 NF cellular protein
- 4: pat.6 CAF cellular protein
- 5: pat.7 NF cellular protein
- 6: pat.7 CAF cellular protein
- 7: pat.9 NF cellular protein
- 8: pat.9 CAF cellular protein
- 9: pat.10 NF cellular protein
- 10: pat.10 CAF cellular protein
- M: Precision Plus Protein All Blue

|    | αSMA     | FSP1     | FAPα     | CAV1     | CD90     |
|----|----------|----------|----------|----------|----------|
| 1  | 24986.38 | 96974.56 | 24101.77 | 33276.17 | 56257.40 |
| 2  | 26089.10 | 79189.43 | 23552.81 | 31357.38 | 36932.62 |
| 3  | 25919.40 | 31549.58 | 22145.90 | 33647.50 | 43875.31 |
| 4  | 33036.94 | 8315.99  | 28072.27 | 31812.77 | 30663.22 |
| 5  | 25274.65 | 4932.87  | 33880.75 | 41278.65 | 36679.87 |
| 6  | 26870.46 | 6042.00  | 32460.24 | 54850.60 | 41749.12 |
| 7  | 35316.87 | 9990.07  | 27947.29 | 44721.82 | 40514.53 |
| 8  | 50461.65 | 8524.43  | 45481.82 | 38401.48 | 24637.97 |
| 9  | 28426.87 | 7209.82  | 21600.82 | 34601.41 | 58743.36 |
| 10 | 47403.95 | 7993.79  | 18309.65 | 43315.48 | 24689.41 |



**Figure S5 A), part 3**

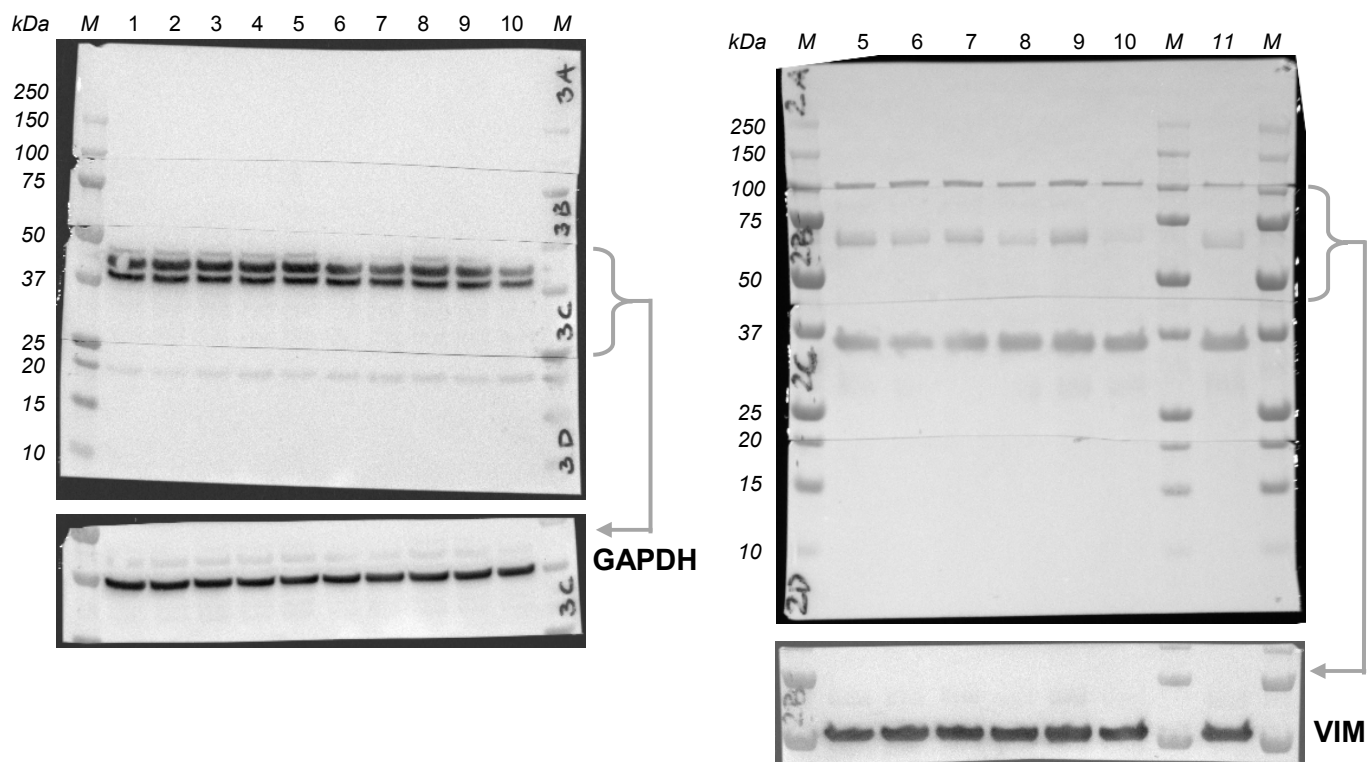

**lanes:** 1: pat.5 NF cellular protein  
 2: pat.5 CAF cellular protein  
 3: pat.6 NF cellular protein  
 4: pat.6 CAF cellular protein  
 5: pat.7 NF cellular protein  
 6: pat.7 CAF cellular protein  
 7: pat.9 NF cellular protein  
 8: pat.9 CAF cellular protein  
 9: pat.10 NF cellular protein  
 10: pat.10 CAF cellular protein  
 11: fibroblast cellular protein mix (2)  
 M: Precision Plus Protein All Blue

|    | VIM      | GAPDH    |
|----|----------|----------|
| 1  | -        | 88767.36 |
| 2  | -        | 83131.58 |
| 3  | -        | 77634.75 |
| 4  | -        | 71036.17 |
| 5  | 50736.31 | 68480.87 |
| 6  | 53438.07 | 68618.75 |
| 7  | 56358.07 | 63402.29 |
| 8  | 57093.65 | 70563.82 |
| 9  | 60087.95 | 69855.46 |
| 10 | 55744.72 | 65747.41 |
| 11 | 60220.97 | -        |

**Figure S5 A), part 4**

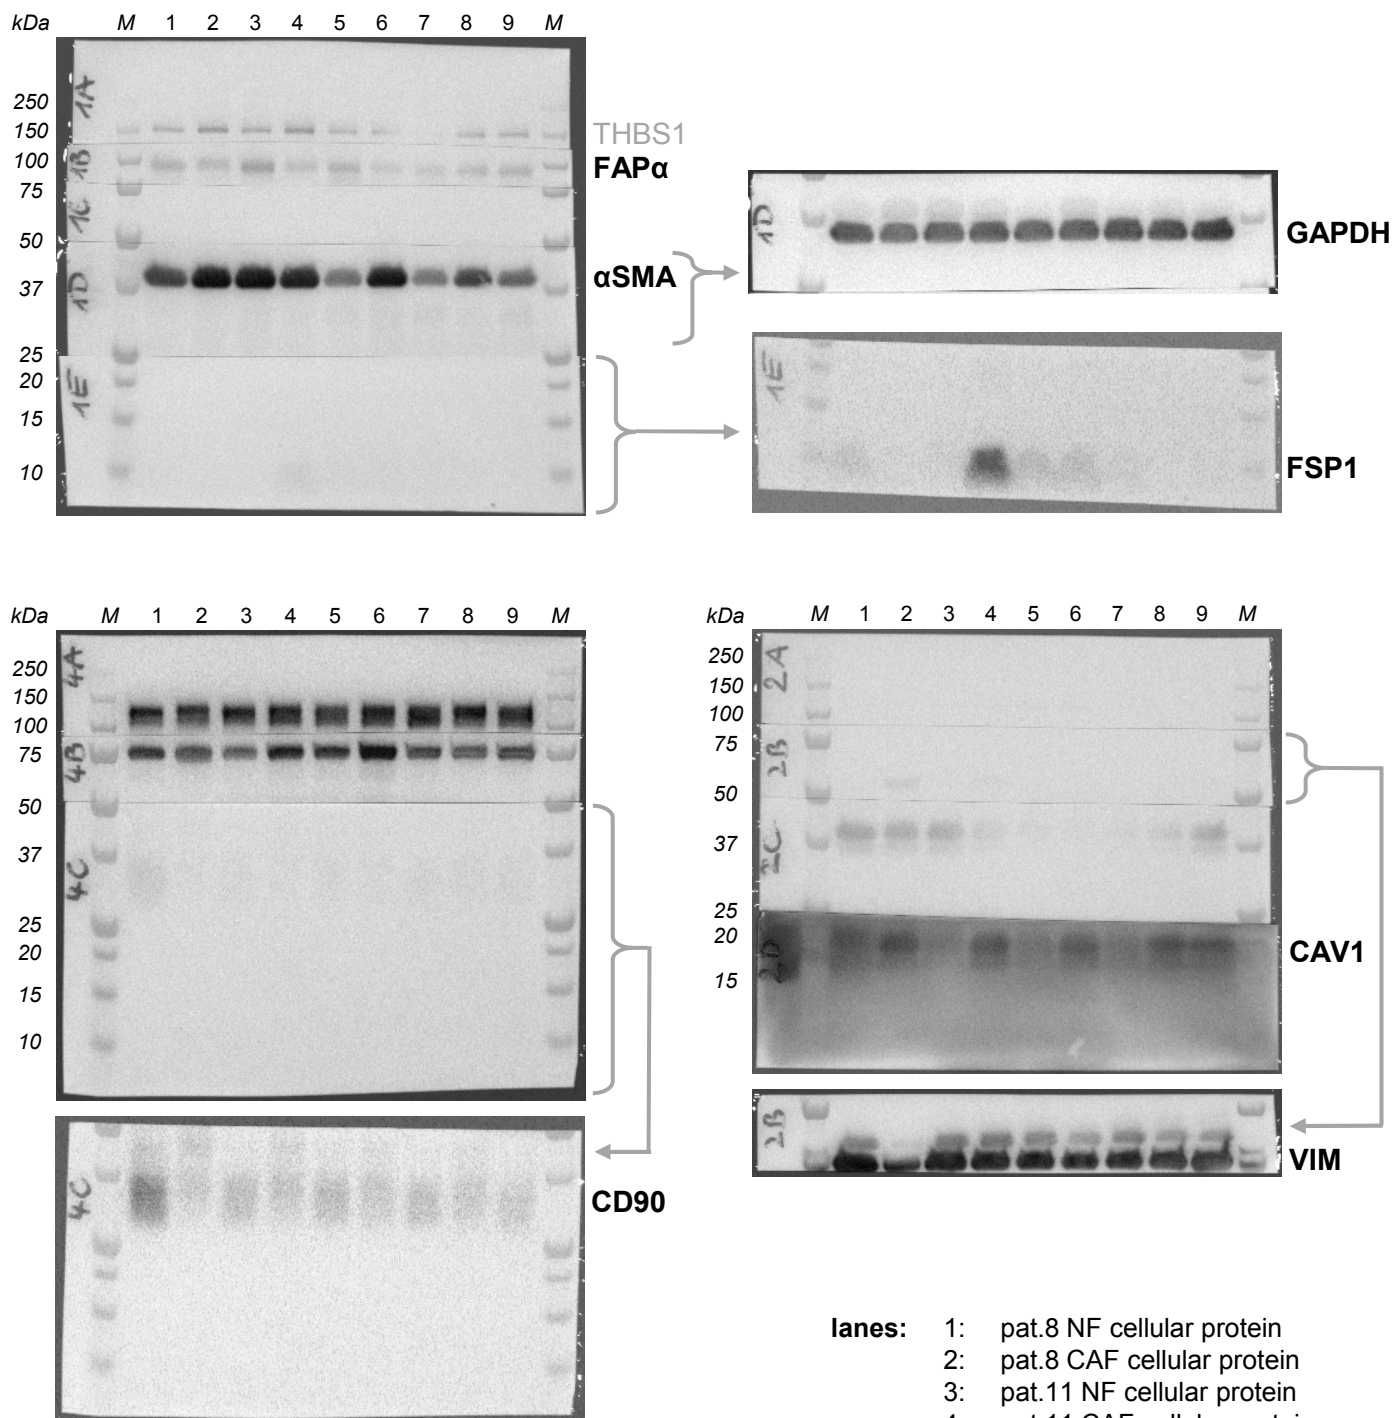

**lanes:**

- 1: pat.8 NF cellular protein
- 2: pat.8 CAF cellular protein
- 3: pat.11 NF cellular protein
- 4: pat.11 CAF cellular protein
- 5: pat.12 NF cellular protein
- 6: pat.12 CAF cellular protein
- 7: pat.13 NF<sub>1</sub> cellular protein
- 8: pat.13 CAF cellular protein
- 9: pat.13 NF<sub>2</sub> cellular protein

**M:** Precision Plus Protein All Blue

|   | αSMA     | FSP1     | FAPα     | CAV1     | VIM      | CD90     | GAPDH    |
|---|----------|----------|----------|----------|----------|----------|----------|
| 1 | 63158.72 | 10064.36 | 52791.02 | 63935.17 | 87085.26 | 62502.72 | 62228.84 |
| 2 | 80621.36 | 2511.31  | 45654.48 | 64840.55 | 32170.87 | 13838.75 | 45707.82 |
| 3 | 83376.07 | 6203.65  | 74080.77 | 17306.95 | 76257.89 | 22574.07 | 54546.07 |
| 4 | 70696.77 | 72266.62 | 35800.82 | 41345.14 | 63403.95 | 17240.24 | 56949.65 |
| 5 | 29534.29 | 15683.75 | 48801.24 | 16195.41 | 56228.95 | 22879.65 | 53759.65 |
| 6 | 73536.72 | 15566.14 | 20257.12 | 38355.31 | 44623.82 | 15891.24 | 58157.36 |
| 7 | 25780.63 | 6947.53  | 17889.63 | 18212.29 | 53605.82 | 18947.77 | 65880.24 |
| 8 | 44655.53 | 3619.36  | 29718.82 | 48809.95 | 57998.70 | 15991.00 | 63999.12 |
| 9 | 32964.11 | 2429.41  | 42085.61 | 50764.77 | 71995.19 | 15493.84 | 76739.19 |
