# Supplementary material for: Proteomic Analyses of Fibroblast- and Serum-Derived Exosomes Identify QSOX1 as a Marker for Non-invasive Detection of Colorectal Cancer
Source: Cancers (Basel). 2021 Mar 17;13(6):1351. doi: 10.3390/cancers13061351 (PMC8002505; doi:10.3390/cancers13061351)
Supplement: Supplementary file 1 [file cancers-13-01351-s001.zip › cancers-1104651-Supplementary Tables S1-S5.xlsx]

## Sheet: Table S1
Table S1: Clinicopathologic information on patients 1-13. Overview of gender and age of the patients at time point of diagnosis, the primary tumour localisation and metastasis status at time point of surgery and tissue collection, as well as TNM stage, mutational and microsatellite status, pretreatment and therapy response.
pat.	gender	age at diagn.	P loc.	MET	surgery	histological staging				mutational status				MS status	neoadj. therapy	therapy response
						T	N	M	UICC	TP53	KRAS	BRAF	NRAS			P	MET
1	♂	47	rectum	liv	P	3c	1b	1a	IVA	nda	wt	wt	nda	stable	CTx	medium	strong
2	♀	52	c. sigm.	liv, per	P	3b	2b	1c	IVC	nda	nda	nda	nda	stable	CTx	nda	medium
3	♂	76	rectum	-	Re	3	0	0	IIA	wt	wt	wt	wt	nda	RCTx	nda	nda
4	♀	44	c. sigm.	liv	P	2	1b	1a	IVA	MUT	wt	wt	wt	stable	CTx	strong	strong
5	♂	68	rectum	-	P	3a	0	0	IIA	MUT	wt	wt	wt	stable	no	-	-
6	♂	56	c. desc.	-	P	3a	2b	0	IIIC	MUT	wt	wt	wt	stable	no	-	-
7	♀	64	rectum	-	P	1	0	0	I	MUT	wt	wt	wt	stable	no	-	-
8	♀	78	rectum	liv	P	3b	2a	1a	IVA	MUT	MUT	wt	wt	nda	CTx	medium	strong
9	♀	59	c. sigm.	-	P	3a	0	0	IIA	wt	wt	wt	wt	stable	no	-	-
10	♂	75	c. sigm.	-	P	3b	2b	0	IIIC	MUT	wt	wt	wt	stable	no	-	-
11	♂	67	c. desc.	per	P	4a	2a	1c	IVC	MUT	wt	MUT	wt	stable	no	-	-
12	♀	59	rectum	-	P	4a	1c	0	IIIB	MUT	wt	wt	MUT	stable	no	-	-
13	♂	51	rectum	lung	P	3b	1a	1a	IVA	wt	MUT	wt	wt	stable	RCTx	strong	strong
Abbreviations: c. desc.: colon descendens; c. sigm.: colon sigmoideum; CTx: chemotherapy; diagn.: diagnosis; liv: liver; loc: localization; M: metastatic stage; MET: metastasis; MSI: microsatellite stability; MUT: mutation; N: nodule stage; nda: no data available; neoadj.: neoadjuvant; P: primary tumour; pat.: patient; per: peritoneum; RCTx: radiochemotherapy; Re: recidive; T: tumour stage; UICC:…

## Sheet: Table S2
Table S2: Mass spectrometric data and statistical analysis results for pat.1-3 NF- and CAF-derived EXOs in biological triplicates.
Abbreviations: CAF: cancer-associated fibroblast; EXO: exosome; NF: normal fibroblast.
pat1_NF-EXO_n1_01	pat1_NF-EXO_n2_02	pat1_NF-EXO_n3_03	pat1_CAF-EXO_n1_04	pat1_CAF-EXO_n2_05	pat1_CAF-EXO_n3_06	pat2_NF-EXO_n1_07	pat2_NF-EXO_n2_08	pat2_NF-EXO_n3_09	pat2_CAF-EXO_n1_10	pat2_CAF-EXO_n2_11	pat2_CAF-EXO_n3_12	pat3_NF-EXO_n1_13	pat3_NF-EXO_n2_14	pat3_NF-EXO_n3_15	pat3_CAF-EXO_n1_16	pat3_CAF-EXO_n2_17	pat3_CAF-EXO_n3_18	N: -Log Student's T-test p-value CRC_C	N: Student's T-test q-value CRC_C	N: Student's T-test Difference CRC_C	T: Protein names	T: Gene names
30.2533	30.715	30.9484	29.8572	30.1797	29.6656	29.9097	31.1914	31.4331	33.6198	32.9583	33.9889	31.8645	32.4481	31.9589	20.7145	22.39	22.0861	0.719655	0.327808	-2.80691	Alpha-2-macroglobulin	A2M
NaN	20.9012	21.4373	21.529	NaN	NaN	NaN	21.0524	21.2799	21.79	21.4567	20.7827	NaN	NaN	NaN	NaN	NaN	NaN	NaN	NaN	NaN	ATP-binding cassette sub-family A member 1	ABCA1
NaN	NaN	NaN	NaN	NaN	NaN	21.9584	NaN	NaN	NaN	20.7907	21.4289	NaN	NaN	NaN	NaN	NaN	NaN	NaN	NaN	NaN	Multidrug resistance-associated protein 1	ABCC1
NaN	NaN	NaN	NaN	NaN	NaN	21.5428	NaN	NaN	NaN	NaN	22.0229	NaN	NaN	NaN	NaN	NaN	NaN	NaN	NaN	NaN	Multidrug resistance-associated protein 4	ABCC4
NaN	NaN	NaN	NaN	NaN	NaN	21.4215	NaN	NaN	NaN	NaN	NaN	NaN	NaN	NaN	NaN	NaN	NaN	NaN	NaN	NaN	Acetyl-CoA carboxylase 1;Biotin carboxylase;Acetyl-CoA carboxylase 2;Biotin carboxylase	ACACA;ACACB
24.3335	25.2743	25.3229	27.0353	26.4292	26.3652	28.0364	24.7601	24.6568	26.2677	26.2564	25.3745	NaN	24.7155	24.0045	24.8933	NaN	25.7259	0.515304	0.448453	0.847044	ATP-citrate synthase	ACLY
NaN	NaN	NaN	23.4033	NaN	22.5188	23.8669	NaN	NaN	NaN	22.1456	NaN	NaN	NaN	NaN	NaN	NaN	NaN	NaN	NaN	NaN	Cytoplasmic aconitate hydratase	ACO1
NaN	NaN	NaN	NaN	NaN	NaN	NaN	NaN	NaN	NaN	20.8012	NaN	NaN	NaN	NaN	NaN	NaN	NaN	NaN	NaN	NaN	Tartrate-resistant acid phosphatase type 5	ACP5
NaN	21.9144	23.6775	NaN	NaN	NaN	22.2296	NaN	21.4868	NaN	NaN	NaN	NaN	NaN	NaN	NaN	NaN	NaN	NaN	NaN	NaN	Long-chain-fatty-acid--CoA ligase 4	ACSL4
28.9516	28.6868	29.1908	30.0913	29.2542	29.3153	29.8326	28.1069	27.9887	29.3524	28.8069	29.3335	28.3333	28.6804	28.381	28.274	27.8654	28.113	0.471563	0.542495	0.250418	Actin, cytoplasmic 1;Actin, cytoplasmic 1, N-terminally processed	ACTB
24.379	24.6633	24.8079	27.4138	25.0309	25.2447	27.1016	24.894	23.7001	25.8184	25.8046	26.3043	24.3882	NaN	NaN	NaN	24.1327	24.8029	0.698018	0.34848	1.06386	Actin, alpha cardiac muscle 1;Actin, alpha skeletal muscle	ACTC1;ACTA1
NaN	NaN	NaN	NaN	NaN	NaN	NaN	NaN	NaN	NaN	21.8608	NaN	NaN	NaN	NaN	NaN	NaN	NaN	NaN	NaN	NaN	Actin, cytoplasmic 2;Actin, cytoplasmic 2, N-terminally processed	ACTG1
30.0341	30.1777	29.6044	31.4901	30.7666	30.6724	30.2237	29.9742	29.6188	30.772	30.2475	30.7128	29.418	29.6737	29.3222	30.3636	29.4876	30.2655	2.7151	0.0270476	0.747929	Alpha-actinin-1	ACTN1
NaN	NaN	NaN	NaN	NaN	NaN	NaN	NaN	NaN	NaN	NaN	NaN	NaN	NaN	NaN	NaN	NaN	30.4289	NaN	NaN	NaN	Alpha-actinin-2	ACTN2
25.9485	26.1891	25.6591	27.4413	26.6068	26.6784	26.0028	25.8202	25.7304	27.3843	26.7013	27.4009	23.4216	24.2985	24.8699	26.5235	25.9675	26.7176	3.47224	0.002	1.49798	Alpha-actinin-4	ACTN4
NaN	21.9688	22.187	23.4975	22.096	21.993	24.0332	22.331	NaN	22.4456	21.8483	21.9247	NaN	NaN	NaN	NaN	NaN	22.2857	0.234583	0.698025	0.232443	Alpha-centractin	ACTR1A
24.4183	24.0836	24.5365	25.7785	24.9446	24.5548	24.7374	23.2058	23.3269	24.7181	24.7372	24.5083	NaN	NaN	24.4289	23.8391	NaN	NaN	0.439744	0.492688	0.605745	Actin-related protein 2	ACTR2
25.3727	25.0431	25.7173	27.0427	26.4401	25.7033	26.2244	24.4654	24.3162	26.1039	25.9281	25.9379	23.0613	24.8619	25.1717	23.1024	NaN	24.4628	0.442298	0.524208	0.39366	Actin-related protein 3	ACTR3
NaN	22.0129	NaN	22.8214	23.5523	23.0177	22.9881	22.0803	22.5342	22.6505	23.2968	23.3464	NaN	NaN	NaN	NaN	22.4192	NaN	1.80649	0.0875152	0.963061	Disintegrin and metalloproteinase domain-containing protein 10	ADAM10
NaN	NaN	NaN	NaN	NaN	NaN	NaN	NaN	NaN	NaN	NaN	21.2507	NaN	NaN	NaN	NaN	NaN	NaN	NaN	NaN	NaN	Disintegrin and metalloproteinase domain-containing protein 9	ADAM9
24.5212	24.8998	25.2579	24.9891	23.4433	25.2543	25.4398	25.7105	25.9228	26.6744	26.4003	25.6754	22.8161	24.5529	22.9382	NaN	NaN	NaN	0.715917	0.363415	-0.736457	A disintegrin and metalloproteinase with thrombospondin motifs 1	ADAMTS1
NaN	NaN	NaN	NaN	NaN	NaN	NaN	NaN	NaN	NaN	NaN	NaN	NaN	NaN	NaN	NaN	NaN	24.3797	NaN	NaN	NaN	A disintegrin and metalloproteinase with thrombospondin motifs 13	ADAMTS13
NaN	NaN	NaN	NaN	NaN	NaN	NaN	NaN	NaN	NaN	NaN	18.248	NaN	NaN	NaN	NaN	NaN	NaN	NaN	NaN	NaN	A disintegrin and metalloproteinase with thrombospondin motifs 5	ADAMTS5
NaN	22.1168	NaN	NaN	NaN	NaN	23.3565	23.4917	22.701	NaN	NaN	NaN	NaN	23.6513	22.9455	NaN	NaN	NaN	NaN	NaN	NaN	Alcohol dehydrogenase 1B;Alcohol dehydrogenase 1A	ADH1B;HEL-S-117;ADH1A
NaN	NaN	NaN	NaN	NaN	NaN	21.6455	NaN	NaN	21.7682	NaN	NaN	NaN	NaN	NaN	NaN	NaN	NaN	NaN	NaN	NaN	Alcohol dehydrogenase class-3	ADH5
NaN	NaN	19.5992	NaN	NaN	NaN	21.463	NaN	NaN	19.7926	19.7117	NaN	NaN	NaN	NaN	NaN	NaN	NaN	NaN	NaN	NaN	Adenylosuccinate lyase	ADSL
NaN	23.8186	NaN	NaN	NaN	NaN	22.257	22.8306	23.1287	22.94	23.532	22.7492	NaN	NaN	NaN	NaN	22.6468	22.8831	NaN	NaN	NaN	Adipocyte enhancer-binding protein 1	AEBP1
NaN	NaN	NaN	NaN	NaN	NaN	NaN	NaN	NaN	NaN	NaN	NaN	NaN	30.9058	NaN	NaN	NaN	NaN	NaN	NaN	NaN	Adipocyte enhancer-binding protein 1	AEBP1
26.6994	27.4683	26.4943	27.2242	26.8887	27.9231	26.0272	27.401	27.3389	27.4207	27.4722	27.2648	25.555	22.3815	26.695	NaN	NaN	NaN	0.627748	0.366	-1.11609	Agrin;Agrin N-terminal 110 kDa subunit;Agrin C-terminal 110 kDa subunit;Agrin C-terminal 90 kDa fragment;Agrin C-terminal 22 kDa fragment	AGRN
NaN	22.9401	23.7917	25.0669	24.2515	23.5057	24.9139	22.7079	NaN	23.1748	23.7646	23.5627	NaN	NaN	NaN	NaN	NaN	23.3017	0.527321	0.463088	0.507625	Adenosylhomocysteinase	AHCY
NaN	NaN	NaN	NaN	NaN	NaN	22.8964	NaN	NaN	NaN	NaN	NaN	NaN	NaN	NaN	NaN	NaN	NaN	NaN	NaN	NaN	Neuroblast differentiation-associated protein AHNAK	AHNAK
NaN	NaN	NaN	NaN	NaN	NaN	21.0761	NaN	NaN	NaN	NaN	NaN	NaN	NaN	NaN	NaN	NaN	NaN	NaN	NaN	NaN	Aminoacyl tRNA synthase complex-interacting multifunctional protein 1;Endothelial monocyte-activating polypeptide 2	AIMP1
NaN	NaN	NaN	NaN	NaN	NaN	22.8862	20.0129	NaN	NaN	NaN	NaN	NaN	NaN	NaN	NaN	NaN	NaN	NaN	NaN	NaN	Aminoacyl tRNA synthase complex-interacting multifunctional protein 2	AIMP2
NaN	NaN	NaN	23.1946	NaN	22.9669	23.8241	NaN	NaN	NaN	NaN	NaN	NaN	NaN	NaN	NaN	NaN	NaN	NaN	NaN	NaN	Aldose reductase	AKR1B1
31.9822	29.9259	30.8072	30.3637	30.9449	30.3233	29.6135	28.9392	29.7035	29.3273	29.4389	30.0201	31.6114	31.3748	30.7602	31.449	31.5621	30.8351	0.0741482	0.927221	-0.0503777	Serum albumin	ALB
NaN	NaN	NaN	21.7476	NaN	NaN	NaN	NaN	NaN	NaN	NaN	NaN	NaN	NaN	NaN	NaN	NaN	NaN	NaN	NaN	NaN	CD166 antigen	ALCAM
NaN	23.6099	23.3061	24.3046	24.0992	23.8768	26.3362	23.2996	22.5013	24.4843	24.0022	22.9615	NaN	20.7093	22.9501	NaN	NaN	20.7498	0.402517	0.533518	0.488079	Aldehyde dehydrogenase family 16 member A1	ALDH16A1
24.5654	NaN	NaN	29.5669	28.4075	27.8067	28.5118	25.7567	25.8354	27.7788	27.8089	28.0568	NaN	NaN	25.2546	NaN	NaN	NaN	NaN	NaN	NaN	Retinal dehydrogenase 1	ALDH1A1
27.5113	27.4773	27.9789	29.3411	28.871	28.3124	27.9496	26.4327	26.2631	28.0964	27.7953	27.9531	27.2565	27.2861	27.9675	27.15	27.0691	26.7672	0.883101	0.339607	0.581396	Fructose-bisphosphate aldolase A;Fructose-bisphosphate aldolase	ALDOA
NaN	NaN	NaN	23.5959	NaN	NaN	21.6388	NaN	NaN	NaN	NaN	NaN	NaN	NaN	NaN	NaN	NaN	NaN	NaN	NaN	NaN	Fructose-bisphosphate aldolase C	ALDOC
27.1411	28.6797	27.9688	27.0154	27.188	27.9216	28.9036	28.8717	29.3805	29.1199	28.7359	29.2176	25.907	25.492	28.2533	22.8425	23.0051	21.7322	1.14843	0.171938	-1.5355	Angiopoietin-related protein 2	ANGPTL2
NaN	NaN	NaN	NaN	NaN	NaN	NaN	NaN	NaN	NaN	NaN	NaN	NaN	NaN	NaN	NaN	NaN	21.8944	NaN	NaN	NaN	Ankyrin repeat domain-containing protein 34B	ANKRD34B
NaN	23.3881	23.5142	22.4219	NaN	22.6772	23.8599	23.342	22.9389	NaN	NaN	NaN	NaN	NaN	NaN	NaN	22.9974	23.3471	NaN	NaN	NaN	Aminopeptidase N	ANPEP
NaN	22.3698	23.1451	23.2189	NaN	NaN	23.5516	22.9834	23.4114	22.9582	22.3962	23.4086	NaN	NaN	NaN	NaN	NaN	NaN	NaN	NaN	NaN	Anthrax toxin receptor 1	ANTXR1
24.492	24.9895	25.5464	27.696	26.9156	27.6907	27.1344	25.461	25.2965	26.3054	25.7757	25.9549	21.8595	24.1275	24.0235	23.6573	22.4265	23.6072	0.750699	0.351702	0.788762	Annexin A1	ANXA1
NaN	23.7914	24.091	25.1934	24.4394	24.7693	24.9627	23.9431	23.2677	24.5447	23.984	24.4007	NaN	NaN	23.2154	NaN	NaN	22.4745	0.613972	0.398641	0.648601	Annexin A11	ANXA11
26.4276	26.8371	27.2502	27.7899	27.2461	27.4088	28.1741	27.0197	26.3881	27.0119	26.5003	26.792	25.0776	25.9099	25.8569	27.2003	26.7024	26.8812	0.80497	0.364279	0.510204	Annexin A2;Annexin;Putative annexin A2-like protein	ANXA2;ANXA2P2
NaN	23.8419	23.2684	24.3604	23.6783	24.1638	24.7068	23.8635	23.284	24.0204	23.7464	24.2078	NaN	NaN	NaN	NaN	NaN	NaN	NaN	NaN	NaN	Annexin A4;Annexin	ANXA4
24.2086	25.2758	25.6671	26.1129	25.2964	25.7932	27.2565	26.3163	25.1833	26.3228	25.6195	25.9521	22.8665	24.7809	23.9104	23.7431	23.1816	23.4737	0.0031739	1	0.00334867	Annexin A5;Annexin	ANXA5
25.9778	27.0093	26.753	27.9824	26.546	27.7484	28.1125	27.0668	26.5714	27.2785	27.0879	27.2222	23.5923	23.9824	24.4257	23.8117	23.5089	24.4329	0.355915	0.609589	0.236407	Annexin A6;Annexin	ANXA6
NaN	NaN	NaN	22.5265	NaN	NaN	NaN	NaN	NaN	NaN	NaN	NaN	NaN	NaN	NaN	NaN	NaN	NaN	NaN	NaN	NaN	Annexin A7	ANXA7
NaN	NaN	NaN	NaN	NaN	NaN	NaN	NaN	NaN	NaN	NaN	NaN	NaN	NaN	NaN	NaN	NaN	23.0806	NaN	NaN	NaN	Membrane primary amine oxidase;Retina-specific copper amine oxidase	AOC3;AOC2
NaN	NaN	NaN	22.3591	NaN	NaN	NaN	NaN	NaN	NaN	NaN	NaN	NaN	NaN	NaN	NaN	NaN	NaN	NaN	NaN	NaN	AP-1 complex subunit beta-1	AP1B1
24.402	25.5042	25.4664	26.8244	25.6244	25.5777	26.8346	24.9688	24.3352	26.331	25.9744	25.7044	NaN	23.4951	23.498	21.8623	NaN	22.7395	0.495842	0.478144	0.466925	AP-2 complex subunit alpha-1	AP2A1
NaN	22.6982	22.328	23.3058	22.4938	22.9145	23.4017	22.1126	23.3265	23.3268	23.4018	22.3174	NaN	NaN	NaN	NaN	NaN	NaN	NaN	NaN	NaN	AP-2 complex subunit alpha-2	AP2A2
23.6311	26.158	25.2554	26.9512	25.3491	25.3887	27.2682	25.3533	24.4279	26.3008	26.0426	25.8759	NaN	23.3647	23.7224	NaN	NaN	22.9014	0.12923	0.813349	0.167706	AP-2 complex subunit beta	AP2B1
NaN	23.1945	NaN	23.5306	NaN	23.4126	23.8573	NaN	NaN	23.638	22.4472	NaN	NaN	NaN	NaN	NaN	NaN	NaN	NaN	NaN	NaN	AP-2 complex subunit mu	AP2M1
NaN	NaN	NaN	NaN	NaN	NaN	22.1456	NaN	NaN	NaN	NaN	NaN	NaN	NaN	NaN	NaN	NaN	NaN	NaN	NaN	NaN	AP-2 complex subunit sigma	AP2S1
NaN	NaN	NaN	NaN	NaN	NaN	NaN	NaN	NaN	NaN	NaN	19.561	NaN	NaN	NaN	NaN	NaN	NaN	NaN	NaN	NaN	AP-3 complex subunit delta-1	AP3D1
NaN	23.0567	23.1767	24.5906	24.1457	23.7468	23.6858	NaN	22.5312	23.1917	23.1131	23.5436	NaN	NaN	NaN	NaN	NaN	NaN	NaN	NaN	NaN	Acylamino-acid-releasing enzyme	APEH
26.1891	26.6471	27.0395	24.0789	NaN	NaN	25.8018	27.1625	26.3652	24.425	24.0892	24.1049	NaN	23.9022	25.0074	NaN	NaN	NaN	2.74631	0.00133333	-3.20112	Apolipoprotein E	APOE
24.0217	23.0186	23.6433	NaN	NaN	23.7878	21.8671	23.2176	22.8718	22.7997	23.4135	22.8824	NaN	22.4678	23.111	NaN	NaN	22.0222	0.240734	0.676	-0.305458	Amyloid beta A4 protein;N-APP;Soluble APP-alpha;Soluble APP-beta;C99;Beta-amyloid protein 42;Beta-amyloid protein 40;C83;P3(42);P3(40);C80;Gamma-secretase C-terminal fragment 59;Gamma-secretase C-terminal fragment 57;Gamma-secretase C-terminal fragment 50;C31	APP
NaN	22.5478	22.781	23.413	21.9141	22.3622	23.9721	22.3142	22.3355	22.908	22.8479	22.8951	NaN	NaN	NaN	NaN	NaN	21.9231	0.443485	0.515874	0.422719	ADP-ribosylation factor 1;ADP-ribosylation factor 3;ADP-ribosylation factor 5	ARF1;ARF3;ARF5
NaN	NaN	NaN	NaN	NaN	NaN	NaN	22.8766	NaN	NaN	NaN	NaN	NaN	NaN	NaN	NaN	NaN	NaN	NaN	NaN	NaN	Arginase-1	ARG1
NaN	NaN	NaN	22.2898	NaN	NaN	NaN	NaN	NaN	NaN	NaN	NaN	NaN	NaN	NaN	NaN	NaN	NaN	NaN	NaN	NaN	Rho GTPase-activating protein 1	ARHGAP1
NaN	NaN	NaN	NaN	NaN	NaN	NaN	NaN	NaN	NaN	17.787	NaN	NaN	NaN	NaN	NaN	NaN	NaN	NaN	NaN	NaN	PRA1 family protein 3	ARL6IP5
NaN	22.8383	24.3575	23.6721	NaN	23.2115	23.4185	22.7479	23.025	22.6612	23.3731	24.0367	NaN	NaN	NaN	NaN	NaN	NaN	NaN	NaN	NaN	ADP-ribosylation factor-like protein 8B;ADP-ribosylation factor-like protein 8A	ARL8B;ARL8A
NaN	NaN	NaN	NaN	NaN	NaN	22.232	NaN	NaN	NaN	NaN	NaN	NaN	NaN	NaN	NaN	NaN	NaN	NaN	NaN	NaN	LisH domain-containing protein ARMC9	ARMC9
24.079	23.9445	24.2116	26.2714	25.7164	24.5642	25.086	23.4759	23.0652	25.3646	24.8681	24.3972	NaN	23.0632	NaN	NaN	NaN	22.8356	0.181051	0.728613	0.291309	Actin-related protein 2/3 complex subunit 1B	ARPC1B
23.3746	23.2862	23.1739	25.0957	24.3637	24.3497	23.9939	23.3055	23.785	25.1465	24.6813	23.8125	NaN	24.1826	NaN	NaN	NaN	NaN	0.030712	0.957439	-0.0613338	Actin-related protein 2/3 complex subunit 2	ARPC2
NaN	20.6405	NaN	22.3928	21.537	21.2721	21.3903	NaN	NaN	NaN	21.6803	21.3606	NaN	NaN	NaN	NaN	NaN	NaN	NaN	NaN	NaN	Actin-related protein 2/3 complex subunit 3	ARPC3
23.5666	23.6633	24.0293	25.3146	24.8922	24.7685	24.0565	23.2774	23.1528	24.5609	24.7339	24.1535	NaN	23.7764	23.8297	NaN	NaN	23.3339	0.217996	0.70415	0.252243	Actin-related protein 2/3 complex subunit 4	ARPC4-TTLL3;ARPC4
NaN	NaN	NaN	22.7619	NaN	NaN	NaN	NaN	NaN	NaN	NaN	NaN	NaN	NaN	NaN	NaN	NaN	NaN	NaN	NaN	NaN	Acid ceramidase;Acid ceramidase subunit alpha;Acid ceramidase subunit beta	ASAH1
NaN	NaN	NaN	NaN	NaN	NaN	NaN	NaN	NaN	NaN	NaN	19.6104	NaN	NaN	NaN	NaN	NaN	NaN	NaN	NaN	NaN	Aspartyl/asparaginyl beta-hydroxylase	ASPH
NaN	NaN	NaN	NaN	NaN	NaN	21.7114	NaN	NaN	NaN	NaN	NaN	NaN	NaN	NaN	NaN	NaN	NaN	NaN	NaN	NaN	Bifunctional purine biosynthesis protein PURH;Phosphoribosylaminoimidazolecarboxamide formyltransferase;IMP cyclohydrolase	ATIC
NaN	NaN	NaN	21.8469	NaN	NaN	23.5721	NaN	NaN	NaN	NaN	NaN	NaN	NaN	NaN	NaN	NaN	NaN	NaN	NaN	NaN	Atlastin-3	ATL3
NaN	24.9422	25.6344	24.6771	23.2035	24.52	25.936	24.7131	25.4292	25.5316	25.0793	25.9039	NaN	NaN	NaN	NaN	NaN	NaN	NaN	NaN	NaN	Sodium/potassium-transporting ATPase subunit alpha-1	ATP1A1
22.889	23.0663	24.2442	23.1308	NaN	23.1084	23.6691	23.0813	23.5513	24.1538	23.4584	24.19	NaN	NaN	NaN	NaN	NaN	NaN	NaN	NaN	NaN	Sodium/potassium-transporting ATPase subunit beta-3	ATP1B3
NaN	NaN	NaN	NaN	NaN	NaN	NaN	NaN	NaN	NaN	NaN	NaN	NaN	NaN	NaN	NaN	NaN	18.2516	NaN	NaN	NaN	Plasma membrane calcium-transporting ATPase 1;Calcium-transporting ATPase;Plasma membrane calcium-transporting ATPase 3	ATP2B1;ATP2B3
NaN	22.6045	23.656	23.3956	NaN	22.568	23.7508	22.5007	22.5106	NaN	23.1237	23.0595	NaN	NaN	NaN	NaN	NaN	NaN	NaN	NaN	NaN	Plasma membrane calcium-transporting ATPase 4	ATP2B4
22.0984	21.9944	23.7583	23.269	NaN	22.4029	22.0098	NaN	NaN	22.7089	22.7928	22.957	NaN	NaN	NaN	NaN	NaN	NaN	NaN	NaN	NaN	V-type proton ATPase 116 kDa subunit a isoform 1;V-type proton ATPase subunit a	ATP6V0A1
23.7526	23.2084	25.0712	24.8982	NaN	23.3566	23.8037	22.744	23.5769	24.5149	24.5797	24.7445	NaN	NaN	NaN	NaN	NaN	NaN	NaN	NaN	NaN	V-type proton ATPase subunit d 1	ATP6V0D1
NaN	NaN	NaN	NaN	NaN	NaN	NaN	NaN	NaN	NaN	NaN	21.8719	NaN	NaN	NaN	NaN	NaN	NaN	NaN	NaN	NaN	V-type proton ATPase subunit d 2	ATP6V0D2
25.1021	25.6941	27.645	26.6119	24.638	25.4165	25.9191	24.4642	24.8159	25.6281	26.4485	26.9239	NaN	22.5997	23.6241	NaN	NaN	NaN	0.170743	0.73812	-0.282258	V-type proton ATPase catalytic subunit A	ATP6V1A
NaN	23.4548	25.3785	24.5069	NaN	23.4747	23.6642	22.768	23.4092	24.5961	24.3882	24.7272	NaN	NaN	NaN	NaN	NaN	NaN	NaN	NaN	NaN	V-type proton ATPase subunit B, brain isoform	ATP6V1B2
NaN	NaN	NaN	NaN	NaN	NaN	20.7542	NaN	NaN	NaN	21.4357	NaN	NaN	NaN	NaN	NaN	NaN	NaN	NaN	NaN	NaN	V-type proton ATPase subunit C 1	ATP6V1C1
NaN	NaN	NaN	NaN	NaN	NaN	19.9901	NaN	NaN	NaN	NaN	NaN	NaN	NaN	NaN	NaN	NaN	NaN	NaN	NaN	NaN	V-type proton ATPase subunit D	ATP6V1D
NaN	NaN	NaN	21.8513	NaN	NaN	NaN	NaN	NaN	NaN	21.263	21.7481	NaN	NaN	NaN	NaN	NaN	NaN	NaN	NaN	NaN	V-type proton ATPase subunit G 1	ATP6V1G1
NaN	NaN	24.5075	24.3089	NaN	NaN	23.2013	NaN	22.3418	23.1159	23.775	24.0972	NaN	NaN	NaN	NaN	NaN	NaN	NaN	NaN	NaN	V-type proton ATPase subunit H	ATP6V1H
NaN	NaN	NaN	NaN	NaN	NaN	NaN	24.3293	21.5155	NaN	NaN	NaN	NaN	NaN	NaN	NaN	NaN	NaN	NaN	NaN	NaN	Zinc-alpha-2-glycoprotein	AZGP1
NaN	NaN	NaN	NaN	NaN	NaN	NaN	NaN	NaN	NaN	NaN	NaN	NaN	NaN	NaN	NaN	NaN	21.1238	NaN	NaN	NaN	Beta-2-microglobulin;Beta-2-microglobulin form pI 5.3	B2M
NaN	NaN	NaN	21.2936	NaN	NaN	21.6601	22.3201	21.1797	NaN	NaN	NaN	NaN	NaN	NaN	NaN	NaN	NaN	NaN	NaN	NaN	Brain acid soluble protein 1	BASP1
NaN	NaN	NaN	NaN	NaN	NaN	NaN	NaN	NaN	NaN	NaN	NaN	NaN	NaN	NaN	27.1484	26.8933	27.5346	NaN	NaN	NaN	Biglycan	BGN
23.9798	23.4232	23.6801	23.6438	24.3756	24.1664	24.0968	23.0184	23.1262	23.2925	23.3986	23.8128	24.1014	23.7465	23.9816	25.265	24.9382	25.3095	1.30753	0.23041	0.560925	Bone morphogenetic protein 1	BMP1
NaN	NaN	NaN	NaN	NaN	NaN	NaN	NaN	NaN	NaN	NaN	21.4397	NaN	NaN	NaN	NaN	NaN	NaN	NaN	NaN	NaN	Brain protein I3	BRI3
22.8756	22.9111	23.4021	23.5049	23.1702	23.3207	23.7706	NaN	NaN	NaN	22.4169	NaN	NaN	NaN	NaN	NaN	NaN	23.3017	NaN	NaN	NaN	Basigin	BSG
23.0449	24.4942	23.428	24.3502	24.0224	24.6738	24.0993	24.6196	24.9213	24.2733	25.3503	24.4587	NaN	23.7363	NaN	22.5674	23.3322	23.031	1.07664	0.255011	0.689123	Complement C1q tumor necrosis factor-related protein 3	C1QTNF3-AMACR;C1QTNF3
24.8659	24.197	25.0901	25.0511	24.1711	24.206	24.0202	24.6491	25.1338	25.5076	24.5025	25.9644	NaN	24.7038	25.7742	NaN	NaN	NaN	0.663481	0.357719	-1.24191	Complement C1q tumor necrosis factor-related protein 5	C1QTNF5
31.7195	31.7815	31.3676	31.3828	31.3047	31.6125	31.5104	31.8075	31.6375	32.6759	32.3943	32.2878	31.3715	31.1942	31.9431	29.794	29.2052	28.9423	0.538151	0.456695	-0.525922	Complement C1r subcomponent;Complement C1r subcomponent heavy chain;Complement C1r subcomponent light chain	C1R
30.9136	30.8658	30.6354	30.7445	30.6682	30.943	30.5577	30.8153	30.4544	31.7675	31.5248	31.2517	30.4027	30.367	31.1079	28.9599	28.4802	28.256	0.378526	0.562719	-0.391565	Complement C1s subcomponent;Complement C1s subcomponent heavy chain;Complement C1s subcomponent light chain	C1S
23.4624	27.8313	29.7264	25.2897	26.6527	26.4897	27.22	27.3639	27.9033	27.0009	25.4291	26.0503	29.7574	29.6707	28.9869	22.9785	25.6078	26.7057	1.57736	0.0742069	-2.19089	Complement C3;Complement C3 beta chain;C3-beta-c;Complement C3 alpha chain;C3a anaphylatoxin;Acylation stimulating protein;Complement C3b alpha chain;Complement C3c alpha chain fragment 1;Complement C3dg fragment;Complement C3g fragment;Complement C3d fragment;Complement C3f fragment;Complement C3c alpha chain fragment 2	C3
NaN	22.896	21.6853	22.4111	NaN	22.4752	22.7469	22.6837	22.4479	23.8022	23.5457	23.6334	NaN	NaN	NaN	NaN	NaN	NaN	NaN	NaN	NaN	Complement C4-A;Complement C4 beta chain;Complement C4-A alpha chain;C4a anaphylatoxin;C4b-A;C4d-A;Complement C4 gamma chain	C4A
26.3446	26.5904	25.7725	26.5212	26.0318	26.1289	27.246	26.9739	26.9468	28.1574	28.3932	27.4332	26.2279	25.9522	24.8446	21.1229	NaN	23.1397	0.607144	0.382326	-1.12341	Complement C4-B;Complement C4 beta chain;Complement C4-B alpha chain;C4a anaphylatoxin;C4b-B;C4d-B;Complement C4 gamma chain	C4B
NaN	NaN	25.3054	NaN	NaN	NaN	NaN	NaN	NaN	NaN	NaN	NaN	NaN	NaN	NaN	NaN	NaN	NaN	NaN	NaN	NaN	Complement component C6	C6
NaN	NaN	NaN	NaN	NaN	NaN	NaN	21.5847	22.3172	NaN	NaN	NaN	25.2211	25.2423	23.7699	NaN	NaN	NaN	NaN	NaN	NaN	Complement component C7	C7
NaN	NaN	NaN	NaN	NaN	22.0147	21.9389	NaN	NaN	22.0186	NaN	NaN	NaN	NaN	NaN	NaN	NaN	NaN	NaN	NaN	NaN	Voltage-dependent calcium channel subunit alpha-2/delta-1;Voltage-dependent calcium channel subunit alpha-2-1;Voltage-dependent calcium channel subunit delta-1	CACNA2D1
NaN	21.1114	NaN	22.9549	22.5371	22.5289	26.882	NaN	NaN	NaN	21.0998	NaN	NaN	NaN	NaN	NaN	NaN	NaN	NaN	NaN	NaN	CAD protein;Glutamine-dependent carbamoyl-phosphate synthase;Aspartate carbamoyltransferase;Dihydroorotase	CAD
NaN	NaN	NaN	NaN	NaN	NaN	NaN	NaN	NaN	NaN	NaN	20.4319	NaN	NaN	NaN	NaN	NaN	NaN	NaN	NaN	NaN		CALM3;CALM1;CALM2
NaN	NaN	NaN	NaN	NaN	NaN	NaN	26.075	NaN	NaN	NaN	NaN	NaN	NaN	NaN	NaN	NaN	NaN	NaN	NaN	NaN	Calmodulin-like protein 5	CALML5
NaN	20.7374	NaN	23.7364	NaN	21.7233	24.9747	NaN	NaN	NaN	NaN	20.7468	NaN	NaN	NaN	NaN	NaN	NaN	NaN	NaN	NaN	Calcium/calmodulin-dependent protein kinase type II subunit delta	CAMK2D
NaN	21.926	NaN	23.4527	NaN	22.8022	23.7063	NaN	NaN	NaN	NaN	NaN	NaN	NaN	NaN	NaN	NaN	NaN	NaN	NaN	NaN	Cullin-associated NEDD8-dissociated protein 1	CAND1
NaN	21.485	21.7158	23.0925	22.5029	22.2364	21.9477	21.9793	NaN	22.5027	22.3433	21.9495	NaN	NaN	NaN	NaN	NaN	NaN	NaN	NaN	NaN	Calpain-1 catalytic subunit	CAPN1
NaN	NaN	NaN	22.8354	22.2422	22.3331	22.6955	NaN	21.5672	22.7463	22.2546	22.1056	NaN	NaN	NaN	NaN	NaN	NaN	NaN	NaN	NaN	Calpain-2 catalytic subunit	CAPN2
NaN	NaN	NaN	NaN	NaN	NaN	NaN	NaN	NaN	NaN	NaN	20.5678	NaN	NaN	NaN	NaN	NaN	NaN	NaN	NaN	NaN	Calpain-5	CAPN5
NaN	NaN	NaN	NaN	NaN	NaN	NaN	25.4531	NaN	NaN	NaN	NaN	NaN	NaN	NaN	NaN	NaN	NaN	NaN	NaN	NaN	Caspase-14;Caspase-14 subunit p17, mature form;Caspase-14 subunit p10, mature form;Caspase-14 subunit p20, intermediate form;Caspase-14 subunit p8, intermediate form	CASP14
NaN	22.9727	NaN	23.1994	23.1484	22.2527	NaN	24.7023	NaN	22.2514	22.1897	NaN	NaN	NaN	NaN	NaN	NaN	NaN	NaN	NaN	NaN	Catalase	CAT
NaN	NaN	NaN	NaN	NaN	NaN	NaN	NaN	NaN	NaN	NaN	21.8138	NaN	NaN	NaN	NaN	NaN	NaN	NaN	NaN	NaN		CBFB
NaN	23.8318	NaN	NaN	NaN	21.3166	24.6253	25.2023	26.4682	23.0024	23.3487	22.4635	NaN	NaN	NaN	NaN	NaN	NaN	NaN	NaN	NaN	Coiled-coil domain-containing protein 80	CCDC80
NaN	20.4383	NaN	23.0685	20.8321	21.0641	26.8379	NaN	NaN	20.8373	20.3084	19.1991	NaN	NaN	NaN	NaN	NaN	NaN	NaN	NaN	NaN	T-complex protein 1 subunit beta	CCT2
NaN	20.2179	NaN	22.7771	NaN	21.3816	26.6033	NaN	NaN	21.5201	20.1373	20.2061	NaN	NaN	NaN	NaN	NaN	NaN	NaN	NaN	NaN	T-complex protein 1 subunit gamma	CCT3
NaN	22.4425	23.2155	24.1717	23.2041	23.5967	25.264	NaN	NaN	23.8611	22.7331	NaN	NaN	NaN	NaN	NaN	NaN	NaN	NaN	NaN	NaN	T-complex protein 1 subunit delta	CCT4
NaN	20.5898	20.5587	23.9501	21.7408	21.7154	25.9176	NaN	NaN	21.4375	20.9243	21.139	NaN	21.0201	21.217	NaN	NaN	20.3759	0.0108097	0.989272	-0.0215711	T-complex protein 1 subunit epsilon	CCT5
NaN	NaN	20.5621	21.1289	20.6817	21.3769	24.3966	20.41	NaN	21.5291	20.4371	20.0303	NaN	20.1436	NaN	NaN	NaN	20.2643	0.0715118	0.909113	-0.102847	T-complex protein 1 subunit zeta	CCT6A
NaN	21.2088	NaN	23.9539	NaN	22.5964	25.6737	NaN	NaN	20.8491	21.4468	NaN	NaN	NaN	NaN	NaN	NaN	21.0301	NaN	NaN	NaN	T-complex protein 1 subunit eta	CCT7
NaN	20.3175	21.2256	23.6827	18.9437	23.0796	26.6621	NaN	NaN	22.9081	19.677	NaN	NaN	NaN	NaN	NaN	NaN	NaN	NaN	NaN	NaN	T-complex protein 1 subunit theta	CCT8
25.18	24.1112	24.5824	24.5135	24.3006	24.6878	24.5225	23.7918	24.3803	25.9321	25.4062	25.6051	23.5783	24.4872	24.082	24.8647	24.472	24.0936	1.17297	0.258744	0.573328	CD109 antigen	CD109
NaN	NaN	NaN	24.037	22.314	22.848	21.0949	NaN	NaN	22.0922	22.2417	21.9024	NaN	NaN	NaN	NaN	NaN	NaN	NaN	NaN	NaN	Monocyte differentiation antigen CD14;Monocyte differentiation antigen CD14, urinary form;Monocyte differentiation antigen CD14, membrane-bound form	CD14
NaN	NaN	NaN	NaN	NaN	NaN	22.0503	NaN	NaN	NaN	NaN	22.9084	NaN	NaN	NaN	NaN	NaN	NaN	NaN	NaN	NaN	CD151 antigen;Tetraspanin	CD151
NaN	23.0089	24.0176	24.9212	25.1736	25.6399	25.1404	22.9055	22.9786	23.9975	23.8548	24.008	NaN	22.9193	NaN	NaN	NaN	22.8624	0.651894	0.378448	0.924046	CD44 antigen	CD44
NaN	22.2727	23.181	22.5982	NaN	NaN	22.7515	22.195	NaN	22.8458	22.1132	22.7346	NaN	NaN	NaN	NaN	NaN	NaN	NaN	NaN	NaN	CD59 glycoprotein	CD59
NaN	27.7718	28.7654	28.6443	NaN	27.5026	27.6858	27.0313	27.0032	27.6639	27.9005	28.1459	NaN	NaN	28.505	NaN	NaN	NaN	NaN	NaN	NaN	Tetraspanin;CD63 antigen	CD63
NaN	NaN	NaN	NaN	NaN	NaN	NaN	NaN	NaN	NaN	NaN	NaN	NaN	NaN	20.7203	NaN	NaN	NaN	NaN	NaN	NaN	Macrosialin	CD68
26.0313	26.1539	25.6085	26.7489	26.4308	26.5124	26.5666	26.304	26.0588	27.1066	26.8699	26.7804	NaN	25.019	25.5467	NaN	NaN	NaN	0.297591	0.603481	-0.542496	Tetraspanin;CD81 antigen	CD81
NaN	24.1137	24.7175	24.8104	NaN	24.125	23.518	23.2366	NaN	24.4239	24.3699	24.2957	NaN	NaN	NaN	NaN	NaN	NaN	NaN	NaN	NaN	CD82 antigen;Tetraspanin	CD82
24.1148	24.6975	24.4339	26.6899	25.3324	26.3604	24.8568	23.9309	24.1312	26.2936	25.8406	26.7061	NaN	NaN	NaN	NaN	NaN	NaN	NaN	NaN	NaN	Tetraspanin;CD9 antigen	CD9
NaN	NaN	NaN	NaN	NaN	NaN	NaN	NaN	NaN	NaN	NaN	NaN	NaN	NaN	NaN	NaN	NaN	20.3067	NaN	NaN	NaN	Corneodesmosin	CDSN
NaN	NaN	NaN	NaN	NaN	NaN	NaN	NaN	NaN	NaN	NaN	NaN	NaN	NaN	22.998	NaN	NaN	NaN	NaN	NaN	NaN	Cadherin EGF LAG seven-pass G-type receptor 1	CELSR1
30.4684	29.6304	30.2256	30.7569	30.008	30.2764	31.519	29.7561	30.0101	30.493	30.5209	30.5123	26.7962	29.4467	29.767	27.1283	27.301	28.8952	0.250018	0.700644	-0.191933	Cell migration-inducing and hyaluronan-binding protein	CEMIP
NaN	NaN	NaN	NaN	NaN	NaN	NaN	NaN	NaN	NaN	NaN	NaN	NaN	NaN	NaN	NaN	NaN	22.9914	NaN	NaN	NaN		CFAP44
NaN	NaN	NaN	NaN	NaN	NaN	NaN	NaN	NaN	NaN	NaN	NaN	NaN	NaN	21.5795	NaN	NaN	NaN	NaN	NaN	NaN	Complement factor D	CFD
26.7967	26.135	26.254	27.1213	27.7621	28.1829	26.6351	27.1711	27.3591	28.5446	28.5324	28.5647	27.9782	27.6891	27.6202	26.9493	27.3505	26.9302	0.972679	0.287596	0.699948	Complement factor H	CFH
NaN	22.4517	23.0096	23.4876	NaN	22.7311	22.9528	22.4176	22.1959	23.8313	23.1109	23.1382	NaN	NaN	NaN	NaN	NaN	NaN	NaN	NaN	NaN	Cofilin-1;Cofilin-2	CFL1;CFL2
NaN	NaN	NaN	23.2703	NaN	22.6084	NaN	21.7985	21.3988	26.6776	27.2914	27.0247	22.6618	NaN	NaN	22.3398	NaN	NaN	NaN	NaN	NaN	Chitinase-3-like protein 1	CHI3L1
NaN	22.5548	22.8599	NaN	NaN	23.0695	NaN	22.5009	22.2986	22.3345	22.0829	22.255	NaN	NaN	22.7652	NaN	NaN	NaN	NaN	NaN	NaN	C-type lectin domain family 11 member A	CLEC11A
NaN	NaN	NaN	NaN	NaN	NaN	NaN	NaN	NaN	21.7743	NaN	NaN	NaN	NaN	NaN	NaN	NaN	NaN	NaN	NaN	NaN	Chloride intracellular channel protein 1	CLIC1
NaN	NaN	NaN	NaN	NaN	NaN	NaN	NaN	NaN	NaN	20.348	NaN	NaN	NaN	NaN	NaN	NaN	NaN	NaN	NaN	NaN	CXADR-like membrane protein	CLMP
NaN	NaN	NaN	NaN	NaN	NaN	NaN	NaN	NaN	NaN	21.1321	NaN	NaN	NaN	NaN	NaN	NaN	NaN	NaN	NaN	NaN	Battenin	CLN3
NaN	NaN	NaN	NaN	NaN	NaN	NaN	NaN	NaN	NaN	23.0553	NaN	NaN	24.8282	NaN	NaN	NaN	NaN	NaN	NaN	NaN	Caseinolytic peptidase B protein homolog	CLPB
24.5542	26.9676	26.4686	28.6313	26.9719	27.4499	29.0141	26.4205	24.4166	27.102	26.7596	26.334	21.6018	24.8192	21.8347	21.6307	20.9746	24.7957	0.263041	0.633209	0.505813	Clathrin heavy chain;Clathrin heavy chain 1	CLTC
NaN	NaN	NaN	NaN	NaN	NaN	NaN	NaN	NaN	NaN	NaN	NaN	NaN	NaN	NaN	NaN	NaN	NaN	NaN	NaN	NaN	Clathrin heavy chain 2	CLTCL1
23.6139	23.7214	24.4243	23.4274	24.4144	24.885	25.1713	23.7431	23.2866	24.6702	23.858	24.6642	23.4731	23.4674	23.6154	23.23	NaN	23.3807	0.0403306	0.959622	-0.0336645	Clusterin;Clusterin beta chain;Clusterin alpha chain;Clusterin	CLU
NaN	20.4332	20.653	20.7664	NaN	NaN	20.5134	NaN	20.4904	21.2432	20.5918	20.7087	NaN	NaN	NaN	NaN	NaN	NaN	NaN	NaN	NaN	2,3-cyclic-nucleotide 3-phosphodiesterase	CNP
30.2935	31.3234	30.6793	30.0458	29.9385	30.2559	30.5113	31.5584	32.0592	31.5103	32.1516	31.0916	31.1585	30.3264	31.2349	30.4902	30.3475	30.6523	0.571682	0.481384	-0.295693	Collagen alpha-1(XII) chain	COL12A1
30.3436	32.2112	30.3839	25.5508	23.6383	24.6168	31.3308	32.1788	32.5055	28.8928	29.3017	28.1675	29.7654	29.9067	30.9835	NaN	NaN	NaN	3.80076	0	-6.18835	Collagen alpha-1(XIV) chain	COL14A1
24.3683	25.7969	25.2744	23.8908	23.7456	24.5979	24.8108	24.5761	23.8715	25.2605	25.2804	25.2584	NaN	NaN	23.9773	NaN	NaN	NaN	0.360751	0.54348	-0.671697	Collagen alpha-1(XVIII) chain;Endostatin	COL18A1
29.0036	29.2997	28.225	27.8411	28.0889	28.3915	29.3642	29.6984	29.7179	28.4329	28.4798	28.4787	29.5652	29.3625	29.4208	31.8858	31.696	32.0386	0.121576	0.819815	0.186214	Collagen alpha-1(I) chain	COL1A1
27.9875	28.1215	27.305	27.1652	27.6266	27.8199	27.8491	28.0881	28.207	27.3798	27.4708	27.6744	28.5705	28.3877	28.3677	31.0599	30.5146	30.9954	0.517543	0.460277	0.535823	Collagen alpha-2(I) chain	COL1A2
26.4917	26.1789	25.201	25.925	25.9835	26.0758	26.0876	26.6804	26.4887	25.6925	25.8233	25.3178	27.5345	27.0679	27.5645	28.2979	27.7852	27.5707	0.142009	0.824368	-0.0915167	Collagen alpha-1(III) chain	COL3A1
NaN	21.9736	NaN	22.2538	NaN	22.0999	21.734	21.8092	22.1358	22.9093	22.6839	22.5196	NaN	NaN	21.7206	NaN	NaN	21.9093	NaN	NaN	NaN	Collagen alpha-1(IV) chain;Arresten	COL4A1
NaN	22.291	NaN	NaN	NaN	NaN	NaN	NaN	NaN	NaN	22.9324	NaN	NaN	NaN	NaN	NaN	NaN	NaN	NaN	NaN	NaN	Collagen alpha-2(IV) chain;Canstatin	COL4A2
NaN	22.6958	NaN	NaN	NaN	NaN	22.0873	22.0754	22.6817	21.8612	22.4973	NaN	23.3782	NaN	NaN	25.9354	25.7414	26.2361	NaN	NaN	NaN	Collagen alpha-1(V) chain	COL5A1
NaN	NaN	NaN	NaN	NaN	23.5958	NaN	NaN	23.3471	NaN	23.493	NaN	NaN	NaN	NaN	26.0675	24.5894	24.492	NaN	NaN	NaN	Collagen alpha-2(V) chain	COL5A2
30.2222	30.3137	30.1075	29.8804	30.8503	31.2941	29.9411	29.5019	29.6319	29.8385	30.2398	29.4954	29.8474	29.3961	30.2171	31.1495	31.3357	31.1058	1.52471	0.155355	0.667847	Collagen alpha-1(VI) chain	COL6A1
28.3857	29.0291	28.3152	28.64	29.6142	30.1568	29.0393	28.7697	28.7681	28.7559	29.2886	28.1663	28.4027	27.8917	28.7281	29.6862	30.2533	29.9248	1.41066	0.156063	0.795177	Collagen alpha-2(VI) chain	COL6A2
NaN	23.2694	22.903	22.944	NaN	23.8257	23.4373	23.3357	23.7767	22.7776	23.1058	22.7174	NaN	NaN	NaN	NaN	NaN	NaN	NaN	NaN	NaN	Collagen alpha-2(VI) chain	COL6A2
31.0131	31.705	30.8961	31.4109	32.2235	32.8704	31.5046	31.1672	31.1948	30.8469	31.5472	30.132	30.7603	30.271	31.3685	32.2509	32.4067	32.5122	1.03692	0.264215	0.702246	Collagen alpha-3(VI) chain	COL6A3
NaN	NaN	NaN	NaN	NaN	NaN	NaN	NaN	NaN	NaN	NaN	NaN	NaN	NaN	NaN	NaN	NaN	21.9241	NaN	NaN	NaN	Collagen alpha-3(VI) chain	COL6A3
NaN	NaN	NaN	NaN	NaN	NaN	NaN	NaN	NaN	20.5111	NaN	NaN	NaN	NaN	NaN	NaN	NaN	NaN	NaN	NaN	NaN	Collagen alpha-1(VII) chain	COL7A1
NaN	21.4279	NaN	24.0336	22.395	22.478	27.4218	20.6844	NaN	21.8079	20.9222	NaN	NaN	NaN	NaN	NaN	NaN	20.9908	NaN	NaN	NaN	Coatomer subunit alpha;Xenin;Proxenin	COPA
NaN	22.5858	NaN	24.3541	23.211	22.1264	26.6527	21.6374	NaN	23.0856	22.4204	20.3841	NaN	20.5417	19.9752	NaN	NaN	20.9152	0.307463	0.608187	0.45482	Coatomer subunit beta	COPB1
NaN	21.0274	NaN	23.7352	21.4705	23.0871	26.5124	20.6421	NaN	22.4481	21.6863	20.7757	NaN	NaN	20.1969	NaN	NaN	21.5942	0.509531	0.450073	0.78059	Coatomer subunit beta	COPB2
NaN	21.2669	20.417	22.0454	21.5176	21.5773	25.5646	20.8029	20.3683	23.3727	21.1351	20.6066	NaN	20.2183	NaN	20.3104	NaN	20.893	0.104431	0.851649	0.141872	Coatomer subunit gamma-1	COPG1
NaN	NaN	NaN	22.9233	NaN	NaN	23.6845	NaN	NaN	NaN	NaN	NaN	NaN	NaN	NaN	NaN	NaN	NaN	NaN	NaN	NaN	COP9 signalosome complex subunit 2	COPS2
NaN	22.9528	NaN	23.8081	22.8398	23.3237	24.315	NaN	NaN	23.8189	22.723	22.877	NaN	NaN	NaN	NaN	NaN	NaN	NaN	NaN	NaN	COP9 signalosome complex subunit 3	COPS3
NaN	22.1465	NaN	23.5696	NaN	22.5878	23.1501	NaN	NaN	23.0209	22.6199	NaN	NaN	NaN	NaN	NaN	NaN	NaN	NaN	NaN	NaN	COP9 signalosome complex subunit 4	COPS4
NaN	NaN	NaN	NaN	NaN	NaN	22.6649	NaN	NaN	NaN	21.609	NaN	NaN	NaN	NaN	NaN	NaN	NaN	NaN	NaN	NaN	COP9 signalosome complex subunit 5	COPS5
NaN	21.1617	NaN	23.3262	NaN	NaN	23.3569	NaN	NaN	22.3237	21.6998	NaN	NaN	NaN	NaN	NaN	NaN	NaN	NaN	NaN	NaN	COP9 signalosome complex subunit 6	COPS6
NaN	19.8251	19.9718	20.6024	NaN	NaN	21.3076	NaN	NaN	20.5966	NaN	NaN	NaN	NaN	NaN	NaN	NaN	NaN	NaN	NaN	NaN	COP9 signalosome complex subunit 7a	COPS7A
23.7306	23.3074	22.945	24.1534	23.7341	22.9174	24.2437	22.4344	22.271	23.0027	23.2539	23.5452	NaN	NaN	23.5534	22.6703	22.4526	22.4995	0.600202	0.44595	0.448179	Coronin-1C;Coronin	CORO1C
NaN	NaN	NaN	NaN	NaN	NaN	NaN	23.6269	20.8709	NaN	NaN	NaN	NaN	NaN	NaN	NaN	NaN	NaN	NaN	NaN	NaN	Carboxypeptidase A4	CPA4
NaN	NaN	NaN	21.8991	NaN	21.307	22.3675	22.1866	NaN	21.9799	21.5459	21.4842	NaN	NaN	NaN	NaN	NaN	NaN	NaN	NaN	NaN	Copine-3	CPNE3
NaN	22.9957	NaN	NaN	NaN	NaN	24.3049	23.4052	23.6866	23.1911	22.9851	NaN	NaN	NaN	NaN	NaN	NaN	NaN	NaN	NaN	NaN	Carboxypeptidase Z	CPZ
NaN	NaN	NaN	NaN	NaN	NaN	NaN	NaN	NaN	NaN	NaN	20.387	NaN	NaN	NaN	NaN	NaN	NaN	NaN	NaN	NaN	Protein CREG1	CREG1
NaN	NaN	NaN	NaN	NaN	NaN	21.7747	21.7117	NaN	NaN	NaN	NaN	NaN	NaN	NaN	NaN	NaN	NaN	NaN	NaN	NaN	Alpha-crystallin B chain	CRYAB
24.0242	24.6602	23.8275	23.9501	24.1068	24.9686	24.272	23.4628	23.053	24.3437	25.2793	23.9639	NaN	NaN	23.3404	NaN	NaN	NaN	0.29993	0.614498	-0.371919	Chondroitin sulfate proteoglycan 4	CSPG4
NaN	NaN	NaN	NaN	NaN	NaN	NaN	25.5687	NaN	NaN	NaN	NaN	NaN	NaN	NaN	NaN	NaN	NaN	NaN	NaN	NaN	Cystatin-A;Cystatin-A, N-terminally processed	CSTA
NaN	NaN	NaN	NaN	NaN	NaN	NaN	NaN	NaN	NaN	NaN	19.1845	NaN	NaN	NaN	NaN	NaN	NaN	NaN	NaN	NaN	Catenin alpha-1	CTNNA1
NaN	NaN	NaN	NaN	NaN	NaN	NaN	NaN	NaN	NaN	NaN	NaN	NaN	NaN	NaN	NaN	NaN	NaN	NaN	NaN	NaN	Catenin beta-1	CTNNB1
NaN	NaN	NaN	NaN	NaN	NaN	NaN	NaN	NaN	NaN	21.773	NaN	NaN	NaN	NaN	NaN	NaN	NaN	NaN	NaN	NaN	Carboxypeptidase;Lysosomal protective protein;Lysosomal protective protein 32 kDa chain;Lysosomal protective protein 20 kDa chain	CTSA
22.7946	22.2795	23.2092	22.7568	22.6949	23.3034	23.1219	22.4342	22.9131	23.3802	23.1507	22.9115	NaN	NaN	NaN	23.0899	NaN	22.7223	0.618526	0.42031	0.5239	Cathepsin B;Cathepsin B light chain;Cathepsin B heavy chain	CTSB
NaN	NaN	NaN	NaN	NaN	NaN	22.4826	NaN	NaN	NaN	NaN	NaN	NaN	NaN	NaN	NaN	NaN	NaN	NaN	NaN	NaN	Dipeptidyl peptidase 1;Dipeptidyl peptidase 1 exclusion domain chain;Dipeptidyl peptidase 1 heavy chain;Dipeptidyl peptidase 1 light chain	CTSC
NaN	NaN	NaN	23.4368	NaN	22.3111	23.1616	23.6834	NaN	NaN	22.8159	22.6499	NaN	NaN	NaN	NaN	NaN	NaN	NaN	NaN	NaN	Cathepsin D;Cathepsin D light chain;Cathepsin D heavy chain	CTSD
NaN	24.1947	24.2954	25.0687	NaN	23.9358	25.1546	25.2859	24.6087	25.0215	25.3067	25.1482	NaN	NaN	NaN	NaN	NaN	NaN	NaN	NaN	NaN	Cathepsin K	CTSK
NaN	NaN	NaN	NaN	NaN	NaN	NaN	NaN	NaN	20.8135	NaN	NaN	NaN	NaN	NaN	NaN	NaN	NaN	NaN	NaN	NaN	NADH-cytochrome b5 reductase 3;NADH-cytochrome b5 reductase 3 membrane-bound form;NADH-cytochrome b5 reductase 3 soluble form	CYB5R3
NaN	21.1306	NaN	21.9238	21.3152	21.7028	23.8962	20.8191	20.0507	21.6393	21.3062	21.5286	NaN	NaN	NaN	NaN	NaN	20.7488	0.525237	0.460628	0.514789	Cytoplasmic FMR1-interacting protein 1	CYFIP1
NaN	22.0958	21.5213	24.421	22.3677	23.6213	25.4905	NaN	21.6192	22.4832	22.2788	21.7719	22.3716	NaN	21.5805	NaN	NaN	22.211	0.221081	0.689719	0.365526	Aspartate--tRNA ligase, cytoplasmic	DARS
NaN	NaN	NaN	NaN	NaN	NaN	NaN	24.898	NaN	NaN	NaN	NaN	NaN	NaN	NaN	NaN	NaN	NaN	NaN	NaN	NaN	Dermcidin;Survival-promoting peptide;DCD-1	DCD
28.3023	30.2694	28.8478	28.6793	28.526	29.2607	29.3934	30.7379	30.8049	29.9379	29.5998	29.4409	29.5079	29.2089	30.2465	28.4588	27.6841	28.3268	1.42978	0.153655	-0.822738	Decorin	DCN
NaN	NaN	NaN	NaN	NaN	NaN	23.0462	NaN	NaN	NaN	NaN	NaN	NaN	NaN	NaN	NaN	NaN	NaN	NaN	NaN	NaN	Dynactin subunit 1	DCTN1
NaN	NaN	NaN	23.5372	22.8316	22.7754	23.2871	NaN	NaN	22.5622	22.4683	22.3766	NaN	NaN	NaN	NaN	NaN	NaN	NaN	NaN	NaN	DNA damage-binding protein 1	DDB1
NaN	NaN	NaN	21.9778	NaN	21.924	22.4965	21.4692	22.3651	NaN	21.6157	22.7931	NaN	NaN	NaN	NaN	NaN	NaN	NaN	NaN	NaN	Discoidin domain-containing receptor 2	DDR2
NaN	22.7738	NaN	24.1772	NaN	23.1713	24.8926	22.9699	NaN	23.944	22.858	22.3347	NaN	22.6127	NaN	NaN	NaN	NaN	NaN	NaN	NaN	Deoxyribose-phosphate aldolase	DERA
NaN	NaN	NaN	NaN	NaN	NaN	NaN	21.2416	NaN	NaN	NaN	NaN	NaN	NaN	NaN	NaN	NaN	NaN	NaN	NaN	NaN	Desmin	DES
NaN	NaN	NaN	NaN	NaN	NaN	21.2389	NaN	NaN	NaN	NaN	NaN	NaN	NaN	NaN	NaN	NaN	NaN	NaN	NaN	NaN	ATP-dependent RNA helicase A	DHX9
NaN	NaN	NaN	NaN	NaN	NaN	NaN	NaN	NaN	NaN	NaN	NaN	NaN	NaN	22.2033	NaN	NaN	NaN	NaN	NaN	NaN	Dickkopf-related protein 3	DKK3
NaN	22.1285	NaN	NaN	NaN	NaN	23.364	22.5734	22.7845	NaN	23.3339	NaN	NaN	NaN	NaN	NaN	NaN	NaN	NaN	NaN	NaN	Deleted in malignant brain tumors 1 protein	DMBT1
27.126	25.8361	26.3676	26.1906	26.6703	25.6474	25.5941	25.2687	25.4161	25.2836	25.7131	26.1138	27.3198	26.4756	26.9675	27.0254	27.2768	26.4562	0.0009075	1	0.000624975	Dynein heavy chain 8, axonemal	DNAH8
NaN	NaN	NaN	NaN	NaN	NaN	NaN	NaN	NaN	NaN	20.3368	NaN	NaN	NaN	NaN	NaN	NaN	NaN	NaN	NaN	NaN	DnaJ homolog subfamily A member 1	DNAJA1
NaN	NaN	NaN	NaN	NaN	NaN	NaN	NaN	NaN	NaN	NaN	17.8972	NaN	NaN	NaN	NaN	NaN	NaN	NaN	NaN	NaN	DnaJ homolog subfamily A member 2	DNAJA2
NaN	NaN	NaN	NaN	NaN	NaN	21.2322	NaN	NaN	NaN	NaN	NaN	NaN	NaN	NaN	NaN	NaN	NaN	NaN	NaN	NaN	DnaJ homolog subfamily C member 13	DNAJC13
NaN	NaN	NaN	NaN	NaN	NaN	20.9552	NaN	NaN	NaN	NaN	NaN	NaN	NaN	NaN	NaN	NaN	NaN	NaN	NaN	NaN	Dynamin-3;Dynamin-2	DNM3;DNM2
NaN	21.9364	21.911	22.9019	22.4034	22.5736	24.1257	22.2563	21.7456	23.1209	22.3321	22.0322	NaN	NaN	NaN	NaN	NaN	NaN	NaN	NaN	NaN	Aspartyl aminopeptidase	DNPEP
23.9191	25.7917	25.5271	26.2932	24.4926	25.3758	26.8655	26.0647	25.8223	26.5414	26.3189	26.3578	NaN	23.5949	25.191	NaN	NaN	NaN	0.503417	0.447467	-0.838068	Dipeptidyl peptidase 4;Dipeptidyl peptidase 4 membrane form;Dipeptidyl peptidase 4 soluble form	DPP4
NaN	NaN	NaN	21.2051	NaN	NaN	20.7668	20.7241	NaN	21.0838	21.7104	21.3026	NaN	NaN	NaN	NaN	NaN	NaN	NaN	NaN	NaN	Dipeptidyl peptidase 2	DPP7
23.9338	24.8062	23.7952	24.601	24.3129	23.9595	25.7994	24.1259	24.081	24.6035	24.1502	24.2393	23.5049	22.8568	22.7911	24.5176	23.1952	24.0945	0.388942	0.61066	0.219925	Dihydropyrimidinase-related protein 2	DPYSL2
NaN	NaN	NaN	NaN	NaN	NaN	NaN	26.0653	22.8353	NaN	NaN	NaN	22.9795	NaN	NaN	NaN	NaN	NaN	NaN	NaN	NaN	Desmocollin-1	DSC1
NaN	NaN	NaN	NaN	NaN	NaN	NaN	24.379	NaN	NaN	NaN	NaN	NaN	NaN	NaN	NaN	NaN	NaN	NaN	NaN	NaN	Desmocollin-3	DSC3
NaN	NaN	NaN	NaN	NaN	NaN	NaN	28.009	24.1596	22.6536	21.7092	21.5289	23.2012	21.6766	21.6118	NaN	NaN	22.7079	NaN	NaN	NaN	Desmoglein-1	DSG1
NaN	NaN	NaN	NaN	NaN	NaN	NaN	25.7399	23.4878	NaN	NaN	NaN	NaN	22.6856	NaN	NaN	NaN	NaN	NaN	NaN	NaN	Desmoplakin	DSP
24.3691	25.5261	25.1086	28.0858	26.7907	27.5128	29.5475	25.377	23.9173	26.6319	25.9265	25.4645	NaN	20.7364	23.1429	23.8294	22.6064	24.9416	1.29511	0.140906	1.4168	Cytoplasmic dynein 1 heavy chain 1	DYNC1H1
NaN	NaN	NaN	22.0253	NaN	NaN	23.0263	NaN	NaN	NaN	NaN	NaN	NaN	NaN	NaN	NaN	NaN	NaN	NaN	NaN	NaN	Cytoplasmic dynein 1 light intermediate chain 1	DYNC1LI1
24.6346	23.8516	23.8496	23.9519	23.746	24.2876	21.9026	22.3255	22.1577	23.9604	23.9832	23.8614	NaN	NaN	NaN	NaN	NaN	22.1045	1.0254	0.261707	0.886067	Extracellular matrix protein 1	ECM1
24.0293	25.8058	26.694	27.8969	27.321	28.5148	27.1536	26.2795	26.4439	28.3165	28.7033	28.8356	23.8116	23.8813	26.4427	28.062	28.1634	29.1334	3.92392	0	2.71169	EGF-like repeat and discoidin I-like domain-containing protein 3	EDIL3
25.0856	25.3516	25.5278	26.5861	25.5235	25.13	27.0228	24.9278	24.9214	25.9273	25.6207	25.5503	NaN	24.8064	24.7447	25.7163	24.6919	26.438	0.788372	0.342667	0.864791	Putative elongation factor 1-alpha-like 3;Elongation factor 1-alpha 1;Elongation factor 1-alpha;Elongation factor 1-alpha 2	EEF1A1P5;EEF1A1;EEF1A2
NaN	NaN	NaN	23.4854	NaN	22.3806	24.603	NaN	NaN	22.6081	21.864	NaN	NaN	NaN	NaN	NaN	NaN	NaN	NaN	NaN	NaN	Elongation factor 1-gamma	EEF1G
23.7889	23.9812	24.6467	25.897	25.0532	25.4171	26.9803	23.8711	23.6285	25.4629	24.3122	24.3002	NaN	NaN	23.1711	23.5203	NaN	24.0599	1.00832	0.258554	0.946233	Elongation factor 2	EEF2
NaN	25.2172	NaN	22.9013	NaN	25.0074	25.0182	26.3539	26.4735	24.3767	25.0733	25.3027	NaN	NaN	23.2808	NaN	NaN	23.9101	NaN	NaN	NaN	EGF-containing fibulin-like extracellular matrix protein 1	EFEMP1
24.3715	26.7728	25.8828	25.6052	25.6528	26.1596	25.3691	25.713	25.4814	25.6103	25.2674	25.6264	24.828	25.0942	25.6001	24.6582	NaN	25.2834	0.408916	0.543678	-0.381997	EGF-containing fibulin-like extracellular matrix protein 2	EFEMP2
NaN	22.9343	23.9362	24.1864	23.3331	23.5988	24.158	22.8372	22.5291	23.2857	23.3088	23.8287	NaN	NaN	NaN	NaN	NaN	22.4738	1.09139	0.2505	0.792607	EH domain-containing protein 1	EHD1
NaN	23.2922	23.7007	24.404	23.3491	24.4985	25.3229	23.4338	22.9212	23.9996	24.4416	24.1205	NaN	NaN	NaN	NaN	NaN	NaN	NaN	NaN	NaN	EH domain-containing protein 2	EHD2
NaN	NaN	NaN	NaN	NaN	NaN	NaN	NaN	NaN	NaN	NaN	17.4299	NaN	NaN	NaN	NaN	NaN	NaN	NaN	NaN	NaN	EH domain-containing protein 3	EHD3
NaN	NaN	NaN	NaN	NaN	NaN	23.1088	NaN	NaN	22.5091	NaN	NaN	NaN	NaN	NaN	NaN	NaN	NaN	NaN	NaN	NaN	Eukaryotic translation initiation factor 2 subunit 3;Putative eukaryotic translation initiation factor 2 subunit 3-like protein	EIF2S3;EIF2S3L
NaN	22.941	23	25.1915	23.421	24.2977	25.7063	21.8035	NaN	23.302	23.6423	22.5265	NaN	NaN	NaN	NaN	NaN	22.7444	1.30411	0.138473	1.32989	Eukaryotic translation initiation factor 3 subunit A	EIF3A
NaN	22.3608	NaN	22.5963	NaN	22.4311	25.0209	NaN	NaN	NaN	NaN	NaN	NaN	NaN	NaN	NaN	NaN	NaN	NaN	NaN	NaN	Eukaryotic translation initiation factor 3 subunit B	EIF3B
NaN	NaN	NaN	23.1498	NaN	NaN	25.0547	NaN	NaN	NaN	NaN	NaN	NaN	NaN	NaN	NaN	NaN	NaN	NaN	NaN	NaN	Eukaryotic translation initiation factor 3 subunit C;Eukaryotic translation initiation factor 3 subunit C-like protein	EIF3C;EIF3CL
NaN	20.6141	NaN	21.2161	NaN	20.8781	23.1022	NaN	NaN	NaN	NaN	NaN	NaN	NaN	NaN	NaN	NaN	NaN	NaN	NaN	NaN	Eukaryotic translation initiation factor 3 subunit D	EIF3D
NaN	21.4839	NaN	22.9108	21.7004	21.075	23.2594	NaN	21.2325	21.0423	21.7575	21.3936	NaN	NaN	NaN	NaN	NaN	NaN	NaN	NaN	NaN	Eukaryotic translation initiation factor 3 subunit E	EIF3E
NaN	NaN	NaN	NaN	NaN	NaN	20.6876	NaN	NaN	NaN	NaN	NaN	NaN	NaN	NaN	NaN	NaN	NaN	NaN	NaN	NaN	Eukaryotic translation initiation factor 3 subunit I	EIF3I
NaN	23.3275	22.2841	24.2917	23.3178	NaN	24.5524	22.218	NaN	22.9909	22.9747	21.7365	NaN	NaN	NaN	NaN	NaN	NaN	NaN	NaN	NaN	Eukaryotic translation initiation factor 3 subunit L	EIF3L
NaN	NaN	NaN	22.0563	NaN	NaN	23.0839	21.2965	NaN	22.761	21.8846	NaN	NaN	NaN	NaN	NaN	NaN	21.7534	NaN	NaN	NaN	Eukaryotic translation initiation factor 3 subunit M	EIF3M
NaN	NaN	NaN	24.7721	24.0549	23.3423	25.4615	NaN	NaN	NaN	NaN	23.1026	NaN	NaN	NaN	NaN	NaN	NaN	NaN	NaN	NaN	Eukaryotic initiation factor 4A-I;Eukaryotic initiation factor 4A-II;Eukaryotic initiation factor 4A-II, N-terminally processed	EIF4A1;EIF4A2
27.558	29.2066	28.518	27.8192	27.7211	28.3407	28.0268	28.2678	28.1855	28.6189	28.4014	28.6209	27.5651	27.3663	28.3759	25.8759	26.0044	25.9024	0.906785	0.325962	-0.64055	EMILIN-1	EMILIN1
NaN	NaN	NaN	NaN	NaN	NaN	NaN	NaN	NaN	NaN	20.9564	NaN	NaN	NaN	NaN	NaN	NaN	NaN	NaN	NaN	NaN	Endoglin	ENG
23.6061	24.1327	25.2155	24.8223	24.5248	24.5479	25.0345	23.4439	23.6438	24.7392	23.6857	24.3237	NaN	24.6467	23.1377	24.3848	NaN	25.2704	0.177849	0.726265	0.319746	Alpha-enolase	ENO1
NaN	NaN	NaN	NaN	NaN	NaN	NaN	NaN	NaN	NaN	NaN	NaN	NaN	NaN	NaN	NaN	NaN	20.8897	NaN	NaN	NaN	Ectonucleotide pyrophosphatase/phosphodiesterase family member 2	ENPP2
NaN	NaN	NaN	NaN	NaN	NaN	NaN	NaN	NaN	20.556	NaN	NaN	NaN	NaN	NaN	NaN	NaN	NaN	NaN	NaN	NaN	Band 4.1-like protein 2	EPB41L2
NaN	22.7169	NaN	24.3574	NaN	23.2338	26.1343	22.3049	20.8324	23.3628	22.8331	21.0597	NaN	NaN	NaN	NaN	NaN	NaN	NaN	NaN	NaN	Epoxide hydrolase 1	EPHX1
NaN	NaN	NaN	21.9211	19.5973	NaN	27.2238	19.7369	NaN	NaN	19.4916	NaN	NaN	NaN	NaN	NaN	NaN	20.3446	NaN	NaN	NaN	Bifunctional glutamate/proline--tRNA ligase;Glutamate--tRNA ligase;Proline--tRNA ligase	EPRS
NaN	NaN	NaN	NaN	NaN	NaN	21.2745	NaN	NaN	NaN	NaN	NaN	NaN	NaN	NaN	NaN	NaN	NaN	NaN	NaN	NaN	Endoplasmic reticulum-Golgi intermediate compartment protein 1	ERGIC1
NaN	NaN	NaN	NaN	NaN	NaN	20.9647	NaN	NaN	NaN	NaN	NaN	NaN	NaN	NaN	NaN	NaN	NaN	NaN	NaN	NaN	Endoplasmic reticulum-Golgi intermediate compartment protein 2	ERGIC2
NaN	NaN	NaN	21.7435	NaN	NaN	22.8026	NaN	NaN	NaN	NaN	NaN	NaN	NaN	NaN	NaN	NaN	NaN	NaN	NaN	NaN	S-formylglutathione hydrolase	ESD
NaN	NaN	NaN	NaN	NaN	NaN	22.9748	NaN	NaN	NaN	NaN	NaN	NaN	NaN	NaN	NaN	NaN	NaN	NaN	NaN	NaN	Extended synaptotagmin-1	ESYT1
NaN	NaN	NaN	NaN	NaN	NaN	NaN	NaN	NaN	NaN	19.8942	NaN	NaN	NaN	NaN	NaN	NaN	NaN	NaN	NaN	NaN	Protein eva-1 homolog B	EVA1B
26.211	26.186	26.3459	26.1644	26.3578	26.7629	26.9353	26.4424	26.6061	26.8057	26.8035	26.265	26.0159	26.5496	27.0563	25.5037	25.4798	25.7769	0.672489	0.462331	-0.269844	Exostosin-1	EXT1
26.7843	26.2518	26.6067	26.6513	26.7089	27.0252	27.1402	26.4107	26.5	26.5053	26.9811	26.8104	26.581	26.4029	27.1673	25.9114	25.1994	26.0337	0.435683	0.579343	-0.224261	Exostosin-2	EXT2
NaN	NaN	NaN	NaN	NaN	NaN	NaN	NaN	NaN	NaN	22.0956	22.689	NaN	NaN	NaN	NaN	NaN	23.2992	NaN	NaN	NaN	Exostosin-like 2;Processed exostosin-like 2	EXTL2
NaN	22.241	NaN	NaN	NaN	NaN	NaN	NaN	NaN	23.948	NaN	NaN	NaN	NaN	NaN	NaN	NaN	NaN	NaN	NaN	NaN	Tissue factor	F3
NaN	31.5557	NaN	32.3894	NaN	NaN	31.1767	30.9152	NaN	31.2393	NaN	NaN	33.0323	32.8133	33.1556	33.153	NaN	32.6472	NaN	NaN	NaN	Protein FAM107A	FAM107A
NaN	20.874	21.4705	22.9433	21.3512	23.0329	23.0123	20.9087	21.667	23.3242	22.6541	21.4749	NaN	20.8814	NaN	NaN	NaN	NaN	NaN	NaN	NaN	Niban-like protein 1	FAM129B
24.4835	25.2376	25.9177	26.4424	24.8402	25.4614	25.4324	25.4034	25.1592	25.5156	25.8041	26.0021	NaN	NaN	23.7667	NaN	22.7839	23.1974	0.374708	0.590667	0.280146	Prolyl endopeptidase FAP;Antiplasmin-cleaving enzyme FAP, soluble form	FAP
NaN	NaN	NaN	23.6431	NaN	22.5812	23.0561	22.4499	NaN	22.4099	22.287	NaN	NaN	NaN	NaN	NaN	NaN	NaN	NaN	NaN	NaN	FERM, RhoGEF and pleckstrin domain-containing protein 1	FARP1
NaN	24.3097	23.7558	26.7137	25.4366	26.3742	27.7338	23.6237	21.3251	26.146	25.9194	24.6253	NaN	21.4234	NaN	NaN	NaN	23.8593	1.3852	0.113561	1.86299	Fatty acid synthase;[Acyl-carrier-protein] S-acetyltransferase;[Acyl-carrier-protein] S-malonyltransferase;3-oxoacyl-[acyl-carrier-protein] synthase;3-oxoacyl-[acyl-carrier-protein] reductase;3-hydroxyacyl-[acyl-carrier-protein] dehydratase;Enoyl-[acyl-carrier-protein] reductase;Oleoyl-[acyl-carrier-protein] hydrolase	FASN
NaN	22.3979	NaN	24.2291	24.1528	24.5225	24.2475	23.3425	23.5005	23.8843	23.7191	23.9021	NaN	NaN	NaN	NaN	NaN	NaN	NaN	NaN	NaN	Protocadherin Fat 1;Protocadherin Fat 1, nuclear form	FAT1
28.5782	30.1655	27.9205	27.6666	27.4839	27.9693	28.5301	29.9773	29.7132	28.5278	29.0297	28.7038	29.1578	28.2933	29.3423	28.9076	27.8355	27.9861	1.76202	0.103077	-0.840889	Fibulin-1	FBLN1
26.1457	28.5158	25.4213	25.3357	24.2567	25.4672	26.373	28.2212	27.6315	26.0807	26.737	26.4158	26.6701	25.3638	27.8323	NaN	NaN	NaN	1.83564	0.0276	-3.16248	Fibulin-1	FBLN1
24.55	26.8188	23.3506	23.763	NaN	23.3931	24.9415	26.8034	26.3688	NaN	NaN	NaN	NaN	NaN	24.7889	NaN	NaN	NaN	1.44929	0.0854857	-2.67346	Fibulin-2	FBLN2
24.2595	26.2409	25.568	25.2297	24.9772	25.7854	25.2995	25.5866	26.4467	25.1966	25.6724	26.0782	25.1448	24.3799	25.1619	NaN	NaN	22.7628	0.981903	0.257333	-1.05488	Fibulin-5	FBLN5
28.6099	29.745	28.5351	27.977	28.4451	28.7176	29.1645	29.9528	29.7646	28.2429	28.3509	28.3305	29.5408	28.7381	29.4917	30.7544	30.0938	30.9981	0.167871	0.75658	-0.181347	Fibrillin-1	FBN1
23.759	24.8786	23.3696	23.1017	22.685	24.6667	25.2222	27.3023	27.3971	27.5773	28.1206	27.714	22.6261	23.081	25.9141	24.5087	24.8818	25.1134	0.499551	0.464337	0.535488	Fibrillin-2	FBN2
NaN	NaN	NaN	NaN	NaN	NaN	NaN	NaN	NaN	NaN	19.7762	NaN	NaN	NaN	NaN	NaN	NaN	NaN	NaN	NaN	NaN	Fermitin family homolog 2	FERMT2
NaN	NaN	NaN	NaN	NaN	NaN	NaN	22.5639	22.7841	22.5219	23.4935	24.1684	NaN	NaN	NaN	NaN	NaN	NaN	NaN	NaN	NaN	Fibroleukin	FGL2
NaN	22.061	NaN	20.9736	NaN	21.7984	23.2928	23.2437	23.5667	23.1472	22.5504	23.3314	NaN	NaN	NaN	NaN	NaN	NaN	NaN	NaN	NaN	Fin bud initiation factor homolog	FIBIN
NaN	NaN	NaN	NaN	NaN	NaN	NaN	23.5023	NaN	NaN	NaN	NaN	NaN	NaN	NaN	NaN	NaN	NaN	NaN	NaN	NaN	Filaggrin	FLG
NaN	NaN	NaN	NaN	NaN	NaN	NaN	27.4841	22.7661	20.7756	19.651	20.1297	23.1459	20.5054	21.578	21.6516	20.1347	21.9454	NaN	NaN	NaN	Filaggrin-2	FLG2
27.4081	27.5712	25.981	28.6782	28.1567	27.9827	29.1623	28.096	26.5714	27.2804	27.7278	27.548	24.4526	25.3379	26.9476	27.3489	24.8998	27.3708	0.63047	0.399126	0.60723	Filamin-A	FLNA
23.7191	25.036	22.9235	24.8182	22.9453	24.474	27.1551	25.6925	23.5043	24.8766	24.3113	24.3815	NaN	NaN	NaN	NaN	NaN	NaN	NaN	NaN	NaN	Filamin-C	FLNC
NaN	22.213	22.7257	23.4897	22.5948	22.8417	22.6615	22.2276	NaN	22.6956	23.028	23.5691	NaN	NaN	NaN	NaN	NaN	NaN	NaN	NaN	NaN	Flotillin-1	FLOT1
NaN	21.6607	NaN	21.9939	NaN	22.4101	21.8608	NaN	NaN	NaN	21.5605	22.3923	NaN	NaN	NaN	NaN	NaN	NaN	NaN	NaN	NaN	Flotillin-2	FLOT2
NaN	22.3429	NaN	NaN	NaN	NaN	21.9393	22.144	21.85	NaN	NaN	21.7701	NaN	NaN	NaN	NaN	NaN	NaN	NaN	NaN	NaN	Fibromodulin	FMOD
32.2043	33.4958	32.7426	32.4097	32.1128	32.7952	31.6049	32.2914	32.9012	32.5245	32.5211	32.7768	30.9566	30.8298	32.2152	32.1029	33.1153	32.3313	0.54289	0.471486	0.383083	Fibronectin;Anastellin;Ugl-Y1;Ugl-Y2;Ugl-Y3	FN1
NaN	23.3962	22.3881	22.1697	NaN	22.9412	NaN	NaN	23.6259	NaN	NaN	NaN	NaN	NaN	NaN	NaN	NaN	NaN	NaN	NaN	NaN	Fibronectin;Anastellin;Ugl-Y1;Ugl-Y2;Ugl-Y3	FN1
NaN	20.5409	19.1728	18.9771	NaN	20.0817	NaN	NaN	23.334	22.9875	NaN	NaN	NaN	NaN	NaN	NaN	NaN	NaN	NaN	NaN	NaN	Fibronectin;Anastellin;Ugl-Y1;Ugl-Y2;Ugl-Y3	FN1
NaN	NaN	NaN	NaN	NaN	NaN	NaN	NaN	NaN	NaN	21.3038	21.2263	NaN	NaN	NaN	NaN	NaN	NaN	NaN	NaN	NaN	Fibronectin type III domain-containing protein 1	FNDC1
NaN	22.4288	NaN	23.3269	NaN	22.5774	24.45	NaN	NaN	NaN	NaN	NaN	NaN	NaN	NaN	NaN	NaN	NaN	NaN	NaN	NaN	Fascin	FSCN1
NaN	NaN	NaN	22.1236	NaN	22.6791	NaN	NaN	22.1105	NaN	22.3877	NaN	NaN	NaN	NaN	24.8218	23.366	24.782	NaN	NaN	NaN	Follistatin	FST
26.3705	26.6071	27.6705	27.7887	26.3268	26.2887	27.7962	26.084	25.3268	26.0593	26.0639	26.9024	23.6087	24.9501	24.7221	24.7639	24.5643	24.6632	0.0281454	0.967713	0.0317198	Ferritin heavy chain;Ferritin heavy chain, N-terminally processed;Ferritin	FTH1
26.2265	25.8623	26.9629	27.1357	26.3315	25.7585	27.1969	25.2153	24.8185	25.6663	26.0134	26.0805	23.9251	25.092	25.1114	24.062	NaN	24.2466	0.323911	0.607887	-0.37097	Ferritin light chain	FTL
NaN	NaN	NaN	21.6598	NaN	NaN	NaN	NaN	NaN	NaN	NaN	20.8376	NaN	NaN	NaN	NaN	NaN	NaN	NaN	NaN	NaN	Glucose-6-phosphate 1-dehydrogenase	G6PD
NaN	NaN	NaN	21.8139	NaN	21.2047	21.3645	NaN	NaN	NaN	21.3518	20.8274	NaN	NaN	NaN	NaN	NaN	NaN	NaN	NaN	NaN	Lysosomal alpha-glucosidase;76 kDa lysosomal alpha-glucosidase;70 kDa lysosomal alpha-glucosidase	GAA
22.3717	23.1055	NaN	23.1539	22.4294	22.8184	25.753	NaN	21.256	22.7757	22.2789	21.5361	NaN	22.2305	22.341	23.7833	NaN	24.2469	0.428006	0.507788	0.552243	Neutral alpha-glucosidase AB	GANAB
24.0378	26.6078	27.228	27.368	26.1871	26.8617	27.6314	27.0699	25.5968	26.4406	27.5756	27.0181	22.6804	25.0164	25.349	25.1593	23.4782	27.9914	0.629331	0.388331	0.762497	Glyceraldehyde-3-phosphate dehydrogenase	GAPDH
NaN	21.2704	21.3228	22.0221	21.3666	21.6186	24.7172	NaN	NaN	21.514	NaN	21.1267	NaN	NaN	NaN	NaN	NaN	21.4282	NaN	NaN	NaN	Glycine--tRNA ligase	GARS
NaN	20.801	20.752	21.5295	21.6516	24.0626	20.8712	20.5853	NaN	21.7156	21.2997	21.7742	NaN	NaN	NaN	25.9042	26.0906	26.3141	1.92698	0.0289412	2.5565	Growth arrest-specific protein 6	GAS6
NaN	NaN	NaN	22.7348	NaN	NaN	22.7452	NaN	NaN	NaN	NaN	NaN	NaN	NaN	NaN	NaN	NaN	NaN	NaN	NaN	NaN	1,4-alpha-glucan-branching enzyme	GBE1
NaN	21.8697	22.215	22.1713	22.3292	22.6055	21.8751	NaN	21.8324	23.1007	22.1031	21.8272	NaN	NaN	NaN	NaN	NaN	21.8263	1.47818	0.1284	0.966799	Rab GDP dissociation inhibitor beta;Rab GDP dissociation inhibitor alpha	GDI2;GDI1
NaN	21.7735	21.5478	23.8117	22.7862	NaN	26.064	NaN	NaN	21.6696	22.1535	NaN	NaN	NaN	NaN	NaN	NaN	NaN	NaN	NaN	NaN	Glutamine--fructose-6-phosphate aminotransferase [isomerizing] 1	GFPT1
NaN	NaN	NaN	NaN	NaN	NaN	NaN	23.7611	NaN	NaN	NaN	NaN	NaN	NaN	NaN	NaN	NaN	NaN	NaN	NaN	NaN	Gamma-glutamylcyclotransferase	GGCT
NaN	NaN	NaN	21.6583	NaN	NaN	NaN	23.4153	NaN	21.7856	21.9293	21.8787	NaN	NaN	NaN	NaN	NaN	NaN	NaN	NaN	NaN	Gamma-glutamyl hydrolase	GGH
NaN	NaN	NaN	NaN	NaN	NaN	NaN	NaN	NaN	NaN	NaN	NaN	NaN	NaN	18.2223	NaN	NaN	NaN	NaN	NaN	NaN	Gamma-glutamyltransferase 5;Gamma-glutamyltransferase 5 heavy chain;Gamma-glutamyltransferase 5 light chain	GGT5
NaN	NaN	NaN	NaN	NaN	NaN	22.3726	NaN	NaN	NaN	NaN	NaN	NaN	NaN	NaN	NaN	NaN	NaN	NaN	NaN	NaN	Gap junction alpha-1 protein	GJA1
NaN	20.9861	NaN	20.8634	NaN	NaN	21.8594	20.9865	20.6389	NaN	20.728	NaN	NaN	NaN	NaN	NaN	NaN	NaN	NaN	NaN	NaN	Golgi apparatus protein 1	GLG1
NaN	NaN	23.673	23.8189	NaN	22.5897	NaN	NaN	NaN	NaN	NaN	NaN	NaN	NaN	NaN	NaN	NaN	NaN	NaN	NaN	NaN	Glycosylated lysosomal membrane protein	GLMP
NaN	NaN	NaN	23.2811	NaN	NaN	23.3955	NaN	NaN	NaN	NaN	NaN	NaN	NaN	NaN	NaN	NaN	NaN	NaN	NaN	NaN	Glutamate dehydrogenase 1, mitochondrial	GLUD1
NaN	23.577	24.2266	24.3596	NaN	23.7958	24.1388	23.4712	23.7875	24.6014	23.9916	24.2676	NaN	NaN	NaN	NaN	NaN	NaN	NaN	NaN	NaN	Guanine nucleotide-binding protein G(i) subunit alpha-2	GNAI2
NaN	NaN	NaN	NaN	NaN	NaN	NaN	NaN	NaN	NaN	NaN	20.5512	NaN	NaN	NaN	NaN	NaN	NaN	NaN	NaN	NaN	Guanine nucleotide-binding protein G(s) subunit alpha isoforms short;Guanine nucleotide-binding protein G(s) subunit alpha isoforms XLas	GNAS
NaN	24.1926	24.8412	25.211	24.1945	24.4879	24.7521	24.0768	24.2122	25.2279	24.8451	25.0323	NaN	NaN	NaN	NaN	NaN	NaN	NaN	NaN	NaN	Guanine nucleotide-binding protein G(I)/G(S)/G(T) subunit beta-1	GNB1
NaN	22.535	23.5128	23.7091	22.7522	23.0245	23.6354	22.2871	22.8498	23.5205	23.4189	23.5907	NaN	NaN	NaN	NaN	NaN	NaN	NaN	NaN	NaN	Guanine nucleotide-binding protein G(I)/G(S)/G(T) subunit beta-2	GNB2
NaN	NaN	NaN	24.5804	23.8129	23.4866	25.6472	22.1436	NaN	23.5106	22.5023	NaN	NaN	NaN	NaN	NaN	NaN	NaN	NaN	NaN	NaN	Guanine nucleotide-binding protein subunit beta-2-like 1;Guanine nucleotide-binding protein subunit beta-2-like 1, N-terminally processed	GNB2L1
NaN	22.2076	NaN	23.2835	NaN	22.2939	21.9181	NaN	NaN	22.4263	22.179	22.2461	NaN	NaN	NaN	NaN	NaN	NaN	NaN	NaN	NaN	Glucosamine-6-phosphate isomerase;Glucosamine-6-phosphate isomerase 1	GNPDA1
23.6821	NaN	NaN	23.5885	NaN	NaN	22.4711	NaN	23.0628	22.327	23.5132	23.6785	NaN	NaN	NaN	NaN	NaN	NaN	NaN	NaN	NaN	N-acetylglucosamine-6-sulfatase	GNS
25.4749	24.6252	24.8428	25.163	25.641	26.0529	24.7142	23.9855	24.3175	25.4254	25.6072	25.0323	23.5385	NaN	24.4743	NaN	NaN	24.444	0.208227	0.718959	0.230469	Glypican-1;Secreted glypican-1	GPC1
NaN	NaN	NaN	23.993	NaN	24.2593	NaN	NaN	NaN	24.2315	24.156	NaN	NaN	NaN	NaN	NaN	NaN	NaN	NaN	NaN	NaN	Glypican-4;Secreted glypican-4	GPC4
NaN	NaN	NaN	NaN	NaN	NaN	22.7968	22.8062	NaN	22.4509	23.1585	NaN	NaN	NaN	NaN	NaN	NaN	NaN	NaN	NaN	NaN	Glypican-6;Secreted glypican-6	GPC6
25.4788	24.8438	25.3623	26.5548	26.7071	25.945	24.7291	23.8731	24.2396	25.4937	25.0273	25.6791	24.9576	24.9193	25.161	24.5019	23.6817	23.7636	0.503254	0.480415	0.421091	Glucose-6-phosphate isomerase	GPI
NaN	21.906	21.5734	23.7978	NaN	21.6958	23.5169	21.2963	21.2635	NaN	21.0714	21.1891	NaN	NaN	NaN	NaN	NaN	NaN	NaN	NaN	NaN	Transmembrane glycoprotein NMB	GPNMB
NaN	NaN	NaN	24.0556	NaN	NaN	23.8908	NaN	22.4741	22.7874	22.5259	23.4575	NaN	NaN	NaN	NaN	NaN	NaN	NaN	NaN	NaN	Retinoic acid-induced protein 3	GPRC5A
NaN	NaN	NaN	NaN	NaN	NaN	22.287	NaN	NaN	NaN	NaN	NaN	NaN	NaN	NaN	NaN	NaN	NaN	NaN	NaN	NaN	COP9 signalosome complex subunit 1	GPS1
NaN	22.2405	NaN	NaN	NaN	NaN	22.2632	24.3742	23.8628	22.7939	21.1399	22.0441	NaN	NaN	22.1447	NaN	NaN	NaN	NaN	NaN	NaN	Gremlin-1	GREM1
NaN	NaN	NaN	NaN	NaN	NaN	NaN	23.6349	NaN	NaN	NaN	NaN	NaN	NaN	NaN	NaN	NaN	NaN	NaN	NaN	NaN	Gasdermin-A	GSDMA
NaN	NaN	NaN	22.5072	22.2973	22.0445	21.8127	21.5408	21.4033	22.2687	21.6956	NaN	NaN	NaN	NaN	NaN	NaN	NaN	NaN	NaN	NaN	Gelsolin	GSN
NaN	22.4862	NaN	23.4307	22.9067	NaN	NaN	22.2198	22.1814	23.301	22.6143	NaN	NaN	NaN	NaN	NaN	NaN	NaN	NaN	NaN	NaN	Glutathione reductase, mitochondrial	GSR
NaN	NaN	NaN	21.5278	NaN	NaN	22.0175	NaN	NaN	NaN	NaN	NaN	NaN	NaN	NaN	NaN	NaN	NaN	NaN	NaN	NaN	Glutathione S-transferase Mu 3;Glutathione S-transferase Mu 2;Glutathione S-transferase Mu 5	GSTM3;GSTM2;GSTM5
NaN	NaN	NaN	NaN	NaN	NaN	NaN	NaN	NaN	21.5208	NaN	NaN	NaN	NaN	NaN	NaN	NaN	NaN	NaN	NaN	NaN	Glutathione S-transferase P	GSTP1
NaN	NaN	NaN	23.3867	NaN	NaN	23.7685	NaN	NaN	NaN	NaN	NaN	NaN	NaN	NaN	NaN	NaN	NaN	NaN	NaN	NaN	Glycogen [starch] synthase, muscle	GYS1
NaN	NaN	NaN	NaN	NaN	NaN	NaN	NaN	NaN	NaN	22.5762	NaN	NaN	NaN	NaN	NaN	NaN	NaN	NaN	NaN	NaN	Histone H3;Histone H3.3C;Histone H3.2;Histone H3.1t;Histone H3.3;Histone H3.1	H3F3B;H3F3A;HIST2H3PS2;H3F3C;HIST2H3A;HIST3H3;HIST1H3A
NaN	NaN	NaN	NaN	NaN	NaN	NaN	NaN	NaN	NaN	NaN	NaN	NaN	NaN	NaN	NaN	NaN	18.2774	NaN	NaN	NaN	Histidine ammonia-lyase	HAL
NaN	NaN	NaN	22.3416	NaN	NaN	NaN	NaN	21.1558	NaN	NaN	NaN	NaN	NaN	NaN	NaN	NaN	NaN	NaN	NaN	NaN	Beta-hexosaminidase;Beta-hexosaminidase subunit alpha	HEXA
28.5733	27.242	27.5448	27.5838	27.8848	27.9629	26.9422	26.5639	27.1063	26.6411	26.7958	27.8897	29.1669	29.401	28.1724	27.932	28.8977	27.5036	0.318711	0.660404	-0.18014	Putative uncharacterized protein encoded by HEXA-AS1	HEXA-AS1
25.2379	24.1699	25.3775	25.6386	24.7715	24.2934	24.4349	23.3487	23.4145	24.7005	24.5009	25.0255	NaN	24.4589	24.0229	NaN	NaN	NaN	0.544247	0.421197	-0.871297	Beta-hexosaminidase subunit beta;Beta-hexosaminidase subunit beta chain B;Beta-hexosaminidase subunit beta chain A	HEXB
NaN	25.8433	25.8432	24.7087	24.5264	25.8115	25.6291	24.7573	25.8019	23.0458	24.8974	24.0409	23.3611	22.5512	22.1521	NaN	NaN	NaN	0.596719	0.386521	-1.01723	Hepatocyte growth factor;Hepatocyte growth factor alpha chain;Hepatocyte growth factor beta chain	HGF
NaN	22.3203	NaN	NaN	NaN	NaN	NaN	NaN	NaN	NaN	NaN	NaN	NaN	NaN	NaN	NaN	NaN	NaN	NaN	NaN	NaN	Histone H2B;Histone H2B type 2-E;Histone H2B type 2-F;Histone H2B type 1-L;Histone H2B type 1-M;Histone H2B type 1-N;Histone H2B type 1-H;Histone H2B type 3-B;Histone H2B type 1-K;Histone H2B type 1-C/E/F/G/I;Histone H2B type 1-D;Histone H2B type F-S;Histone H2B type 1-B;Histone H2B type 1-O;Histone H2B type 1-J;Histone H2B type 1-A	HIST1H2BN;HIST2H2BE;HIST2H2BF;HIST1H2BL;HIST1H2BM;HIST1H2BH;HIST3H2BB;HIST1H2BK;HIST1H2BC;HIST1H2BD;H2BFS;HIST1H2BB;HIST1H2BO;HIST1H2BJ;HIST1H2BA
NaN	23.8348	NaN	NaN	NaN	NaN	NaN	NaN	NaN	NaN	23.0889	NaN	NaN	NaN	NaN	NaN	NaN	NaN	NaN	NaN	NaN	Histone H4	HIST1H4A
NaN	21.2353	NaN	NaN	NaN	NaN	21.7283	21.6542	NaN	21.3794	22.9107	NaN	NaN	NaN	NaN	NaN	NaN	NaN	NaN	NaN	NaN	Histone H2A type 2-C;Histone H2A type 1-C;Histone H2A type 1;Histone H2A type 1-D;Histone H2A type 2-A;Histone H2A type 1-B/E;Histone H2A type 3;Histone H2A.J;Histone H2A type 1-J;Histone H2A type 1-H;Histone H2A.V;Histone H2A.Z;Histone H2A type 1-A;Histone H2AX;Histone H2A;Histone H2A type 2-B	HIST2H2AC;HIST1H2AC;HIST1H2AG;HIST1H2AD;HIST2H2AA3;HIST1H2AB;HIST3H2A;H2AFJ;HIST1H2AJ;HIST1H2AH;H2AFV;H2AFZ;HIST1H2AA;H2AFX;HIST2H2AB
NaN	NaN	NaN	NaN	NaN	NaN	21.8678	NaN	NaN	NaN	NaN	NaN	NaN	NaN	NaN	NaN	NaN	NaN	NaN	NaN	NaN	Hexokinase-1	HK1
NaN	NaN	NaN	NaN	NaN	NaN	24.1961	23.1357	23.9029	24.4228	24.4008	25.1216	NaN	NaN	NaN	NaN	NaN	NaN	NaN	NaN	NaN	HLA class I histocompatibility antigen, A-3 alpha chain;HLA class I histocompatibility antigen, A-36 alpha chain;HLA class I histocompatibility antigen, A-1 alpha chain	HLA-A
23.9739	25.1018	25.0093	25.6551	23.9228	25.3865	25.0545	24.2176	24.446	25.1905	25.4418	25.8972	NaN	23.4906	23.8877	NaN	NaN	NaN	0.196251	0.71122	-0.365503	HLA class I histocompatibility antigen, A-69 alpha chain;HLA class I histocompatibility antigen, A-68 alpha chain;HLA class I histocompatibility antigen, A-2 alpha chain	HLA-A
NaN	22.8796	NaN	NaN	NaN	22.7686	NaN	NaN	NaN	NaN	NaN	NaN	NaN	NaN	NaN	NaN	NaN	NaN	NaN	NaN	NaN	HLA class I histocompatibility antigen, A-34 alpha chain;HLA class I histocompatibility antigen, A-66 alpha chain;HLA class I histocompatibility antigen, A-33 alpha chain;HLA class I histocompatibility antigen, A-26 alpha chain;HLA class I histocompatibility antigen, A-25 alpha chain;HLA class I histocompatibility antigen, A-43 alpha chain;HLA class I histocompatibility antigen, A-31 alpha chain	HLA-A
23.5861	22.948	23.289	23.5504	23.1122	23.3998	24.2551	22.7874	23.1448	24.6515	24.5689	25.3767	NaN	NaN	NaN	NaN	NaN	NaN	NaN	NaN	NaN	HLA class I histocompatibility antigen, B-7 alpha chain;HLA class I histocompatibility antigen, B-13 alpha chain;HLA class I histocompatibility antigen, B-82 alpha chain	HLA-B
NaN	NaN	NaN	NaN	NaN	20.5666	21.7882	20.2969	20.7973	21.1101	21.078	22.7333	NaN	NaN	NaN	NaN	NaN	NaN	NaN	NaN	NaN	HLA class I histocompatibility antigen, B-35 alpha chain;HLA class I histocompatibility antigen, B-78 alpha chain;HLA class I histocompatibility antigen, B-53 alpha chain;HLA class I histocompatibility antigen, B-52 alpha chain;HLA class I histocompatibility antigen, B-51 alpha chain;HLA class I histocompatibility antigen, B-58 alpha chain	HLA-B
NaN	NaN	NaN	NaN	NaN	NaN	NaN	NaN	NaN	NaN	NaN	21.9646	NaN	NaN	NaN	NaN	NaN	NaN	NaN	NaN	NaN	HLA class I histocompatibility antigen, B-46 alpha chain;HLA class I histocompatibility antigen, B-15 alpha chain;HLA class I histocompatibility antigen, B-56 alpha chain;HLA class I histocompatibility antigen, B-57 alpha chain	HLA-B
NaN	20.7402	20.8896	22.2697	20.4677	22.2732	22.9297	20.7365	22.1194	22.9142	22.6587	23.6565	NaN	NaN	NaN	NaN	NaN	NaN	NaN	NaN	NaN	HLA class I histocompatibility antigen, Cw-7 alpha chain	HLA-C
NaN	NaN	NaN	NaN	NaN	NaN	22.6603	NaN	21.7344	NaN	22.0068	22.3846	NaN	NaN	NaN	NaN	NaN	NaN	NaN	NaN	NaN	HLA class I histocompatibility antigen, Cw-3 alpha chain	HLA-C
NaN	21.5671	NaN	NaN	NaN	NaN	NaN	24.1127	25.3647	NaN	NaN	NaN	NaN	NaN	21.4278	NaN	NaN	NaN	NaN	NaN	NaN	Hemicentin-1	HMCN1
NaN	NaN	NaN	NaN	NaN	NaN	20.2549	NaN	NaN	NaN	NaN	NaN	NaN	NaN	NaN	NaN	NaN	NaN	NaN	NaN	NaN	Heterogeneous nuclear ribonucleoprotein F;Heterogeneous nuclear ribonucleoprotein F, N-terminally processed	HNRNPF
NaN	NaN	NaN	NaN	NaN	NaN	NaN	NaN	NaN	20.6197	NaN	NaN	NaN	NaN	NaN	NaN	NaN	NaN	NaN	NaN	NaN	Heterogeneous nuclear ribonucleoprotein H;Heterogeneous nuclear ribonucleoprotein H, N-terminally processed;Heterogeneous nuclear ribonucleoprotein H2	HNRNPH1;HNRNPH2
NaN	NaN	NaN	NaN	NaN	NaN	NaN	NaN	NaN	NaN	19.2952	NaN	NaN	NaN	NaN	NaN	NaN	NaN	NaN	NaN	NaN	Heterogeneous nuclear ribonucleoprotein K	HNRNPK
21.3444	21.363	22.1948	21.8425	24.308	23.8244	21.4487	30.2098	27.9573	25.9778	25.0602	25.5438	28.2772	26.5951	25.788	26.4604	25.9237	26.2753	0.00145949	1	0.0042288	Hornerin	HRNR
NaN	NaN	NaN	23.1142	NaN	22.579	23.18	NaN	NaN	22.5481	22.4238	22.8027	NaN	NaN	NaN	NaN	NaN	NaN	NaN	NaN	NaN	Heat shock protein HSP 90-alpha	HSP90AA1
NaN	23.5221	24.3594	25.3736	23.7694	24.1795	25.6583	23.2295	22.875	24.5689	23.6157	24.3367	NaN	NaN	23.639	NaN	NaN	23.7264	0.250316	0.664786	0.361284	Heat shock protein HSP 90-beta	HSP90AB1
NaN	NaN	NaN	NaN	NaN	NaN	22.5988	NaN	NaN	NaN	NaN	NaN	NaN	NaN	NaN	NaN	NaN	NaN	NaN	NaN	NaN	Endoplasmin	HSP90B1
NaN	23.4345	23.74	24.1712	23.2279	23.8761	24.0455	23.465	23.7657	23.6248	23.7794	24.2617	NaN	NaN	NaN	NaN	NaN	NaN	NaN	NaN	NaN	Heat shock 70 kDa protein 1A;Heat shock 70 kDa protein 1B	HSPA1A;HSPA1B
NaN	22.785	23.1573	23.8623	NaN	22.7481	22.7691	22.2906	22.3152	NaN	22.188	22.3643	NaN	NaN	NaN	NaN	NaN	NaN	NaN	NaN	NaN	Heat shock-related 70 kDa protein 2	HSPA2
NaN	NaN	NaN	NaN	NaN	NaN	21.9504	NaN	NaN	NaN	NaN	NaN	NaN	NaN	NaN	NaN	NaN	NaN	NaN	NaN	NaN	78 kDa glucose-regulated protein	HSPA5
NaN	NaN	NaN	NaN	NaN	NaN	NaN	NaN	NaN	NaN	NaN	NaN	NaN	NaN	NaN	NaN	21.7516	NaN	NaN	NaN	NaN	Heat shock 70 kDa protein 6;Putative heat shock 70 kDa protein 7	HSPA6;HSPA7
26.8073	27.6121	27.9504	27.814	27.12	27.7184	28.4946	27.2536	26.7003	27.3232	27.4377	27.9011	24.0719	26.3354	26.6258	23.8647	23.9211	24.5962	0.529985	0.46025	-0.461679	Heat shock cognate 71 kDa protein	HSPA8
29.6003	30.7561	30.3431	29.618	29.4456	30.1718	29.8543	31.11	31.1701	30.9727	31.0484	30.5153	28.7064	28.9661	30.3567	NaN	NaN	NaN	1.15217	0.136281	-3.24376	Basement membrane-specific heparan sulfate proteoglycan core protein;Endorepellin;LG3 peptide	HSPG2
26.8522	28.1775	27.7653	27.981	26.1889	27.0487	29.0569	28.1726	28.0277	28.7337	27.8634	27.9907	24.2654	25.9107	27.2098	26.1572	25.3567	26.1935	0.229126	0.706075	-0.213811	Serine protease HTRA1	HTRA1
NaN	NaN	NaN	22.308	20.7958	21.0763	26.6865	NaN	NaN	NaN	20.4767	NaN	NaN	NaN	NaN	NaN	NaN	NaN	NaN	NaN	NaN	Isoleucine--tRNA ligase, cytoplasmic	IARS
NaN	NaN	NaN	23.0089	NaN	22.5697	22.0621	NaN	NaN	23.1825	22.6353	22.8412	NaN	NaN	NaN	NaN	NaN	NaN	NaN	NaN	NaN	Intercellular adhesion molecule 1	ICAM1
NaN	NaN	NaN	NaN	NaN	NaN	NaN	NaN	NaN	NaN	17.8162	NaN	NaN	NaN	NaN	NaN	NaN	NaN	NaN	NaN	NaN	Isocitrate dehydrogenase [NADP] cytoplasmic	IDH1
NaN	23.3516	24.1005	23.9578	NaN	22.2664	23.1948	22.5983	22.2338	23.0349	23.667	24.5371	NaN	NaN	22.8995	NaN	NaN	NaN	NaN	NaN	NaN	Interferon-induced transmembrane protein 1;Interferon-induced transmembrane protein 2;Interferon-induced transmembrane protein 3	IFITM3;IFITM2;IFITM1
NaN	NaN	NaN	NaN	NaN	NaN	20.6688	NaN	NaN	NaN	NaN	NaN	NaN	NaN	NaN	NaN	NaN	NaN	NaN	NaN	NaN	Insulin-like growth factor II;Insulin-like growth factor II;Insulin-like growth factor II Ala-25 Del;Preptin	IGF2
28.0559	27.5633	28.514	29.1252	27.7345	28.3424	28.4709	26.485	27.5054	27.521	28.3653	27.5866	24.0038	25.3126	26.5675	22.838	22.8979	22.9994	0.461671	0.482174	-0.56313	Cation-independent mannose-6-phosphate receptor	IGF2R
NaN	NaN	NaN	NaN	NaN	NaN	22.2619	NaN	NaN	NaN	NaN	NaN	NaN	NaN	NaN	NaN	NaN	NaN	NaN	NaN	NaN	Insulin-like growth factor-binding protein 3	IGFBP3
NaN	NaN	NaN	NaN	NaN	22.2284	24.0103	NaN	NaN	22.7998	24.8693	NaN	NaN	NaN	NaN	NaN	NaN	NaN	NaN	NaN	NaN	Insulin-like growth factor-binding protein 5	IGFBP5
NaN	22.0804	21.8848	23.8618	23.2087	23.7664	22.2655	22.8579	22.376	23.8082	24.0914	23.7194	NaN	NaN	22.5993	22.699	NaN	22.6122	3.1322	0.0016	1.71675	Insulin-like growth factor-binding protein 7	IGFBP7
NaN	NaN	NaN	NaN	NaN	23.2638	22.8249	NaN	22.0427	NaN	22.1338	NaN	NaN	NaN	NaN	NaN	NaN	NaN	NaN	NaN	NaN	Immunoglobulin superfamily member 8	IGSF8
NaN	NaN	NaN	NaN	NaN	NaN	21.1682	NaN	NaN	NaN	NaN	NaN	NaN	NaN	NaN	NaN	NaN	NaN	NaN	NaN	NaN	Inosine-5-monophosphate dehydrogenase 2	IMPDH2
NaN	NaN	NaN	NaN	NaN	NaN	22.3756	NaN	NaN	NaN	NaN	NaN	NaN	NaN	NaN	NaN	NaN	NaN	NaN	NaN	NaN	Importin-5	IPO5
NaN	22.2055	NaN	22.7465	NaN	NaN	22.898	NaN	NaN	22.7161	NaN	NaN	NaN	NaN	NaN	NaN	NaN	NaN	NaN	NaN	NaN	Importin-7	IPO7
NaN	22.1869	NaN	23.6893	22.4478	NaN	23.1533	21.8622	NaN	22.205	22.0031	22.4003	NaN	NaN	NaN	NaN	NaN	NaN	NaN	NaN	NaN	Ras GTPase-activating-like protein IQGAP1	IQGAP1
NaN	22.7148	NaN	23.8845	NaN	23.6601	23.8462	23.8646	23.7874	23.887	23.7388	24.2468	NaN	NaN	NaN	NaN	NaN	NaN	NaN	NaN	NaN	Integrin alpha-1	ITGA1
NaN	23.1497	24.2742	NaN	NaN	22.9138	23.4334	21.7929	21.9352	NaN	NaN	NaN	NaN	NaN	NaN	NaN	NaN	NaN	NaN	NaN	NaN	Integrin alpha-2	ITGA2
NaN	21.6489	21.989	21.6949	22.176	22.3628	22.6747	21.5562	21.6198	23.9061	23.9389	24.8267	NaN	NaN	NaN	NaN	NaN	NaN	NaN	NaN	NaN	Integrin alpha-3;Integrin alpha-3 heavy chain;Integrin alpha-3 light chain	ITGA3
NaN	NaN	NaN	24.2112	23.7191	23.5185	NaN	NaN	NaN	NaN	23.2164	23.7049	NaN	NaN	NaN	NaN	NaN	NaN	NaN	NaN	NaN	Integrin alpha-4	ITGA4
NaN	22.036	NaN	NaN	NaN	NaN	22.4601	21.9963	22.3558	22.455	22.3024	NaN	NaN	NaN	NaN	NaN	NaN	NaN	NaN	NaN	NaN	Integrin alpha-5;Integrin alpha-5 heavy chain;Integrin alpha-5 light chain	ITGA5
22.8557	23.4409	23.1713	23.1008	NaN	23.357	25.2812	23.9637	24.2588	24.2523	24.0376	24.2442	NaN	NaN	21.433	NaN	NaN	21.5886	0.689967	0.4004	-0.461217	Integrin alpha-V;Integrin alpha-V heavy chain;Integrin alpha-V light chain	ITGAV
25.4852	25.7618	25.8062	26.3866	25.7458	26.3409	26.9213	25.496	25.9759	25.8859	25.4664	26.3831	23.5198	23.5094	25.26	NaN	23.6305	24.8272	0.219755	0.734678	-0.151228	Integrin beta-1	ITGB1
NaN	NaN	NaN	NaN	NaN	NaN	22.2198	21.1791	NaN	NaN	21.7012	NaN	NaN	NaN	NaN	NaN	NaN	NaN	NaN	NaN	NaN	Integrin beta;Integrin beta-3	ITGB3
22.1504	22.3036	22.4046	22.1648	NaN	22.0894	22.4072	22.4384	22.0674	22.485	22.132	22.4052	NaN	NaN	NaN	NaN	NaN	NaN	NaN	NaN	NaN	Integrin beta-5;Integrin beta	ITGB5
NaN	NaN	NaN	NaN	NaN	NaN	NaN	NaN	NaN	NaN	NaN	NaN	NaN	NaN	NaN	23.8884	23.8158	24.1923	NaN	NaN	NaN	Integrin beta-like protein 1	ITGBL1
NaN	NaN	NaN	NaN	NaN	NaN	NaN	NaN	NaN	22.0586	NaN	22.3215	NaN	NaN	NaN	NaN	NaN	NaN	NaN	NaN	NaN	Integral membrane protein 2B;BRI2, membrane form;BRI2 intracellular domain;BRI2C, soluble form;Bri23 peptide	ITM2B
NaN	NaN	NaN	NaN	NaN	NaN	21.9724	NaN	NaN	NaN	NaN	NaN	NaN	NaN	NaN	NaN	NaN	NaN	NaN	NaN	NaN	Tyrosine-protein kinase JAK1	JAK1
NaN	21.9437	NaN	22.1833	NaN	22.1053	22.3276	25.1581	23.7468	22.6771	21.9711	22.567	NaN	21.4098	NaN	NaN	20.8331	NaN	NaN	NaN	NaN	Junction plakoglobin	JUP
NaN	NaN	NaN	NaN	NaN	NaN	NaN	NaN	NaN	NaN	NaN	NaN	NaN	NaN	NaN	NaN	NaN	21.957	NaN	NaN	NaN	Katanin p60 ATPase-containing subunit A-like 2	KATNAL2
NaN	NaN	NaN	NaN	NaN	NaN	21.5361	NaN	NaN	NaN	NaN	NaN	NaN	NaN	NaN	NaN	NaN	NaN	NaN	NaN	NaN	ER lumen protein-retaining receptor 1	KDELR1
NaN	25.2659	NaN	NaN	NaN	NaN	NaN	NaN	NaN	NaN	NaN	NaN	NaN	NaN	NaN	NaN	NaN	NaN	NaN	NaN	NaN	Lysine-specific histone demethylase 1B	KDM1B
NaN	NaN	NaN	22.1568	NaN	NaN	21.8235	NaN	NaN	NaN	NaN	21.4679	NaN	NaN	NaN	NaN	NaN	NaN	NaN	NaN	NaN	WASH complex subunit strumpellin	KIAA0196
NaN	NaN	20.8861	21.417	NaN	NaN	22.1649	NaN	NaN	NaN	NaN	20.7492	NaN	NaN	NaN	NaN	NaN	NaN	NaN	NaN	NaN	WASH complex subunit 7	KIAA1033
NaN	NaN	NaN	NaN	NaN	NaN	NaN	NaN	NaN	NaN	NaN	NaN	NaN	NaN	NaN	28.8888	NaN	NaN	NaN	NaN	NaN	Kinesin-like protein;Kinesin-like protein KIF1A	KIF1A
NaN	21.5475	NaN	22.5155	NaN	22.3466	24.2013	21.3874	NaN	21.9276	22.1305	NaN	NaN	NaN	NaN	NaN	NaN	NaN	NaN	NaN	NaN	Kinesin-1 heavy chain	KIF5B
NaN	21.5318	21.7623	23.0185	21.8445	21.901	22.9927	NaN	NaN	22.8365	22.0672	21.6212	NaN	NaN	NaN	NaN	NaN	21.4544	1.12662	0.253926	0.698162	Importin subunit beta-1	KPNB1
NaN	NaN	NaN	NaN	NaN	NaN	NaN	NaN	NaN	NaN	NaN	NaN	NaN	NaN	NaN	NaN	NaN	21.7087	NaN	NaN	NaN	Keratinocyte proline-rich protein	KPRP
30.1847	29.5444	29.8471	29.4777	31.1294	29.1775	28.2787	34.7434	32.3113	30.7224	30.1775	30.374	32.3078	32.0011	31.6628	31.656	31.3776	31.528	0.39291	0.532373	-0.584553	Keratin, type II cytoskeletal 1	KRT1
29.7	28.645	29.3515	28.4322	29.9096	27.8413	26.9282	32.7051	30.1979	28.9929	29.0938	28.7022	30.6652	29.8953	30.5536	30.2626	29.6239	30.4463	0.500575	0.461908	-0.592991	Keratin, type I cytoskeletal 10	KRT10
NaN	NaN	NaN	NaN	NaN	NaN	NaN	NaN	NaN	NaN	NaN	NaN	NaN	NaN	NaN	23.2521	NaN	NaN	NaN	NaN	NaN	Keratin, type I cytoskeletal 13	KRT13
NaN	23.8957	24.5697	24.3222	25.1154	23.3017	NaN	29.7685	26.5306	24.4771	24.0937	25.1578	26.545	26.4233	26.4195	26.2861	24.7671	25.5334	0.172547	0.730915	-0.405278	Keratin, type I cytoskeletal 14	KRT14
NaN	22.821	23.2671	23.1973	22.8374	22.4548	NaN	24.0784	24.2753	NaN	NaN	22.8188	NaN	25.7823	23.9701	23.8182	NaN	23.3445	NaN	NaN	NaN	Keratin, type I cytoskeletal 16	KRT16
28.7865	27.5065	28.1612	27.7009	28.5622	26.6705	26.211	32.2106	29.3665	28.3754	28.3435	28.025	29.9071	29.2067	29.6915	29.592	28.8885	29.9034	0.443723	0.494952	-0.554005	Keratin, type II cytoskeletal 2 epidermal	KRT2
NaN	NaN	NaN	NaN	NaN	NaN	NaN	21.8468	NaN	NaN	NaN	NaN	NaN	NaN	NaN	NaN	NaN	NaN	NaN	NaN	NaN	Keratin, type I cytoskeletal 23	KRT23
NaN	30.0921	NaN	NaN	NaN	NaN	NaN	NaN	NaN	NaN	NaN	NaN	NaN	NaN	NaN	NaN	NaN	NaN	NaN	NaN	NaN	Keratin, type I cuticular Ha1	KRT31
NaN	22.5578	NaN	NaN	NaN	NaN	NaN	NaN	NaN	NaN	NaN	NaN	NaN	NaN	NaN	NaN	NaN	NaN	NaN	NaN	NaN	Keratin, type I cuticular Ha2	KRT32
NaN	25.8846	NaN	NaN	NaN	NaN	NaN	NaN	NaN	NaN	NaN	NaN	NaN	NaN	NaN	NaN	NaN	NaN	NaN	NaN	NaN	Keratin, type I cuticular Ha3-I	KRT33A
NaN	27.2557	NaN	NaN	NaN	NaN	NaN	NaN	NaN	NaN	NaN	NaN	NaN	NaN	NaN	NaN	NaN	NaN	NaN	NaN	NaN	Keratin, type I cuticular Ha3-II	KRT33B
NaN	27.8035	NaN	NaN	NaN	NaN	NaN	NaN	NaN	NaN	NaN	NaN	NaN	NaN	NaN	NaN	21.5758	NaN	NaN	NaN	NaN	Keratin, type I cuticular Ha4	KRT34
NaN	23.6153	NaN	NaN	NaN	NaN	NaN	NaN	NaN	NaN	NaN	NaN	NaN	NaN	NaN	NaN	NaN	NaN	NaN	NaN	NaN	Keratin, type I cuticular Ha5	KRT35
NaN	24.883	NaN	NaN	NaN	NaN	NaN	NaN	NaN	NaN	NaN	NaN	NaN	NaN	NaN	NaN	NaN	NaN	NaN	NaN	NaN	Keratin, type I cuticular Ha8	KRT38
23.7575	24.4262	24.8178	25.3259	24.7858	23.5946	23.2102	30.1544	27.2828	25.9632	25.8505	25.6886	27.151	25.7906	26.6966	26.4256	26.0946	25.5394	0.277846	0.624987	-0.446513	Keratin, type II cytoskeletal 5	KRT5
NaN	23.0169	NaN	23.6991	23.2214	23.5967	NaN	NaN	23.9398	NaN	NaN	23.886	NaN	24.9924	25.4301	25.495	NaN	23.7693	NaN	NaN	NaN	Keratin, type II cytoskeletal 6A;Keratin, type II cytoskeletal 6C	KRT6A;KRT6C
NaN	NaN	NaN	NaN	NaN	NaN	NaN	25.8256	25.6602	NaN	NaN	26.1519	NaN	NaN	25.9099	NaN	NaN	NaN	NaN	NaN	NaN	Keratin, type II cytoskeletal 72;Keratin, type II cytoskeletal 71	KRT72;KRT71
NaN	NaN	NaN	NaN	NaN	NaN	NaN	25.4138	24.0835	24.386	NaN	NaN	NaN	NaN	NaN	NaN	NaN	NaN	NaN	NaN	NaN	Keratin, type II cytoskeletal 78	KRT78
NaN	22.9898	22.6516	22.3268	NaN	22.8548	21.8524	NaN	NaN	22.0257	NaN	NaN	NaN	22.576	NaN	NaN	21.9644	21.7934	NaN	NaN	NaN	Keratin, type II cytoskeletal 8	KRT8
NaN	NaN	NaN	NaN	NaN	NaN	NaN	22.8901	NaN	NaN	NaN	NaN	NaN	NaN	NaN	NaN	NaN	NaN	NaN	NaN	NaN	Keratin, type II cytoskeletal 80	KRT80
NaN	24.3207	NaN	NaN	NaN	NaN	NaN	NaN	NaN	NaN	NaN	NaN	NaN	NaN	NaN	NaN	NaN	NaN	NaN	NaN	NaN	Keratin, type II cuticular Hb1	KRT81
NaN	24.7209	NaN	28.9353	NaN	NaN	NaN	NaN	28.3805	NaN	NaN	NaN	NaN	NaN	NaN	NaN	NaN	NaN	NaN	NaN	NaN	Keratin, type II cuticular Hb2	KRT82
NaN	24.3032	NaN	NaN	NaN	NaN	NaN	NaN	NaN	NaN	NaN	NaN	NaN	NaN	NaN	NaN	NaN	NaN	NaN	NaN	NaN	Keratin, type II cuticular Hb3	KRT83
NaN	29.1472	NaN	NaN	NaN	NaN	NaN	NaN	NaN	NaN	NaN	NaN	NaN	NaN	NaN	NaN	24.338	NaN	NaN	NaN	NaN	Keratin, type II cuticular Hb5	KRT85
NaN	30.5277	NaN	NaN	NaN	NaN	20.0063	NaN	NaN	NaN	NaN	NaN	NaN	NaN	NaN	NaN	22.1727	NaN	NaN	NaN	NaN	Keratin, type II cuticular Hb6	KRT86
27.823	28.4104	28.3955	28.3254	29.4334	28.0207	27.0427	34.1258	31.844	30.1466	29.5276	29.8535	32.0303	31.2081	30.1589	30.6226	30.4749	30.3669	0.279495	0.620757	-0.474117	Keratin, type I cytoskeletal 9	KRT9
NaN	21.3435	NaN	NaN	NaN	NaN	NaN	NaN	NaN	NaN	NaN	NaN	NaN	NaN	NaN	NaN	NaN	NaN	NaN	NaN	NaN	Keratin-associated protein 10-12	KRTAP10-12
NaN	24.3617	NaN	NaN	NaN	NaN	NaN	NaN	NaN	NaN	NaN	NaN	NaN	NaN	NaN	NaN	NaN	NaN	NaN	NaN	NaN	Keratin-associated protein 16-1	KRTAP16-1
NaN	22.1018	NaN	NaN	NaN	NaN	NaN	NaN	NaN	NaN	NaN	NaN	NaN	NaN	NaN	NaN	NaN	NaN	NaN	NaN	NaN	Keratin-associated protein 20-2	KRTAP20-2
NaN	28.0301	NaN	NaN	NaN	NaN	NaN	NaN	NaN	NaN	NaN	NaN	NaN	NaN	NaN	NaN	NaN	NaN	NaN	NaN	NaN	Keratin-associated protein 2-2;Keratin-associated protein 2-1;Keratin-associated protein 2-4;Keratin-associated protein 2-3	KRTAP2-1;KRTAP2-2;KRTAP2-4;KRTAP2-3
NaN	24.7487	NaN	NaN	NaN	NaN	NaN	NaN	NaN	NaN	NaN	NaN	NaN	NaN	NaN	NaN	NaN	NaN	NaN	NaN	NaN	Keratin-associated protein 3-1	KRTAP3-1
NaN	23.6263	NaN	NaN	NaN	NaN	NaN	NaN	NaN	NaN	NaN	NaN	NaN	NaN	NaN	NaN	NaN	NaN	NaN	NaN	NaN	Keratin-associated protein 3-3	KRTAP3-3
NaN	21.6393	NaN	NaN	NaN	NaN	NaN	NaN	NaN	NaN	NaN	NaN	NaN	NaN	NaN	NaN	NaN	NaN	NaN	NaN	NaN	Keratin-associated protein 4-12	KRTAP4-12
NaN	26.0597	NaN	NaN	NaN	NaN	NaN	NaN	NaN	NaN	NaN	NaN	NaN	NaN	NaN	NaN	NaN	NaN	NaN	NaN	NaN	Keratin-associated protein 4-3	KRTAP4-3
NaN	25.6326	NaN	NaN	NaN	NaN	NaN	NaN	NaN	NaN	NaN	NaN	NaN	NaN	NaN	NaN	NaN	NaN	NaN	NaN	NaN	Keratin-associated protein 4-6	KRTAP4-6
NaN	22.1452	NaN	NaN	NaN	NaN	NaN	NaN	NaN	NaN	NaN	NaN	NaN	NaN	NaN	NaN	NaN	NaN	NaN	NaN	NaN	Keratin-associated protein 4-7	KRTAP4-7
NaN	25.2347	NaN	NaN	NaN	NaN	NaN	NaN	NaN	NaN	NaN	NaN	NaN	NaN	NaN	NaN	NaN	NaN	NaN	NaN	NaN	Keratin-associated protein 4-8	KRTAP4-8
NaN	NaN	NaN	NaN	NaN	NaN	NaN	NaN	NaN	NaN	NaN	NaN	NaN	NaN	NaN	NaN	NaN	NaN	NaN	NaN	NaN	Keratin-associated protein 9-2;Keratin-associated protein 9-4;Keratin-associated protein 9-9;Keratin-associated protein 9-8;Keratin-associated protein 9-7	KRTAP9-2;KRTAP9-4;KRTAP9-9;KRTAP9-8;KRTAP9-7
NaN	21.523	NaN	NaN	NaN	NaN	NaN	NaN	NaN	NaN	NaN	NaN	NaN	NaN	NaN	NaN	NaN	NaN	NaN	NaN	NaN	Keratin-associated protein 9-3	KRTAP9-3
26.7045	27.1631	27.0909	26.5235	25.8704	26.622	25.2489	27.2279	27.2135	26.8561	26.4398	26.8995	25.2882	24.4281	26.5692	26.4832	26.3321	26.3526	0.16785	0.7615	0.160532	Laminin subunit alpha-1	LAMA1
30.3709	30.3961	29.438	29.325	29.4127	29.4198	28.9331	29.5412	29.3445	28.995	28.8932	28.332	30.1115	29.3649	30.1737	29.3474	29.0977	29.1298	2.54744	0.0572308	-0.635702	Laminin subunit alpha-2	LAMA2
25.9244	26.194	24.2041	26.5826	26.272	26.8027	26.8916	26.8427	26.7665	26.4925	26.6536	26.2204	NaN	NaN	25.7881	NaN	NaN	NaN	0.0903201	0.860928	-0.240252	Laminin subunit alpha-3	LAMA3
31.4961	31.878	31.2527	30.958	30.7339	31.0643	31.2849	31.8324	31.6652	31.4373	31.3612	30.8778	31.3368	30.6779	31.5506	30.061	30.0557	29.5411	2.14363	0.0727143	-0.764914	Laminin subunit alpha-4	LAMA4
29.7399	29.7971	29.1265	29.5644	29.2124	29.6578	28.2291	29.5649	29.2367	29.4567	29.1707	29.1808	27.7586	27.7209	29.2069	NaN	NaN	NaN	0.988394	0.205278	-2.59986	Laminin subunit alpha-5	LAMA5
31.6777	31.7464	31.1222	30.9098	31.0135	31.2592	30.8794	31.1434	30.8557	30.7916	30.8359	30.4941	31.299	30.6935	31.4952	30.455	30.2286	29.9931	2.03417	0.118545	-0.547996	Laminin subunit beta-1	LAMB1
29.7616	30.1941	28.956	29.3264	28.5301	29.2998	30.047	31.2009	30.9713	30.0206	29.8987	29.9379	29.0041	28.6815	29.8825	26.4542	25.6672	26.3178	1.94087	0.0393043	-1.47182	Laminin subunit beta-2	LAMB2
31.9598	31.9963	31.2866	31.1974	31.1719	31.4863	31.3183	31.9253	31.5908	31.3221	31.2427	31.0576	31.6701	30.8598	31.9065	30.7374	30.4238	30.1782	2.02947	0.103474	-0.632901	Laminin subunit gamma-1	LAMC1
25.8599	25.8822	27.2834	27.0578	25.3169	25.6835	25.7633	26.1665	25.4163	26.367	26.5226	26.8928	23.547	25.2183	23.1905	22.6626	NaN	NaN	0.590003	0.386833	-1.16798	Lysosome-associated membrane glycoprotein 1	LAMP1
NaN	24.0391	25.025	24.799	NaN	NaN	24.108	24.2432	24.3037	25.0306	24.9525	25.091	NaN	NaN	NaN	NaN	NaN	NaN	NaN	NaN	NaN	Lysosome-associated membrane glycoprotein 2	LAMP2
NaN	NaN	NaN	NaN	NaN	NaN	22.0681	NaN	NaN	21.6418	22.2217	23.0221	NaN	NaN	NaN	NaN	NaN	NaN	NaN	NaN	NaN	Cytosol aminopeptidase	LAP3
NaN	NaN	NaN	NaN	NaN	NaN	22.7117	NaN	NaN	NaN	NaN	NaN	NaN	NaN	NaN	NaN	NaN	NaN	NaN	NaN	NaN	Leucine--tRNA ligase, cytoplasmic	LARS
NaN	NaN	NaN	18.3886	NaN	NaN	NaN	NaN	NaN	NaN	NaN	NaN	NaN	NaN	NaN	NaN	NaN	NaN	NaN	NaN	NaN	Lipopolysaccharide-binding protein	LBP
25.0856	24.2805	24.992	25.06	25.3677	24.5927	25.0857	23.8887	24.3856	25.3516	24.6448	24.6909	24.1405	24.7897	24.3508	24.982	25.0619	24.7449	1.47465	0.256046	0.388598	L-lactate dehydrogenase A chain	LDHA
23.5683	22.5896	22.7874	23.7302	23.4055	22.9233	22.3338	NaN	NaN	23.4063	22.7628	23.2138	NaN	NaN	NaN	NaN	NaN	NaN	NaN	NaN	NaN	L-lactate dehydrogenase B chain;L-lactate dehydrogenase	LDHB
NaN	NaN	NaN	NaN	NaN	30.1826	NaN	NaN	NaN	NaN	NaN	30.6374	31.5975	NaN	NaN	NaN	NaN	NaN	NaN	NaN	NaN	Leptin receptor	LEPR
NaN	NaN	NaN	NaN	NaN	20.6176	21.0612	NaN	20.5714	NaN	NaN	NaN	NaN	NaN	NaN	NaN	NaN	NaN	NaN	NaN	NaN	Prolyl 3-hydroxylase 1	LEPRE1;P3H1
NaN	NaN	NaN	22.3847	NaN	NaN	NaN	NaN	NaN	NaN	NaN	NaN	NaN	NaN	NaN	NaN	NaN	NaN	NaN	NaN	NaN	Galectin-1	LGALS1
32.1139	32.2817	32.3047	32.6557	32.5127	32.5719	32.8299	31.724	31.6651	32.2649	31.9369	32.188	31.3214	31.6911	32.1928	31.6399	31.4466	31.8453	0.346401	0.704	0.104153	Galectin-3-binding protein	LGALS3BP
NaN	NaN	NaN	NaN	NaN	NaN	23.1464	NaN	NaN	NaN	NaN	NaN	NaN	NaN	NaN	NaN	NaN	NaN	NaN	NaN	NaN	Protein ERGIC-53	LMAN1
NaN	NaN	NaN	NaN	NaN	NaN	22.7683	NaN	NaN	NaN	NaN	NaN	NaN	NaN	NaN	NaN	NaN	NaN	NaN	NaN	NaN	Vesicular integral-membrane protein VIP36	LMAN2
NaN	NaN	NaN	NaN	NaN	NaN	NaN	NaN	NaN	25.958	NaN	NaN	NaN	NaN	NaN	NaN	NaN	NaN	NaN	NaN	NaN		LOXHD1
26.1056	26.5635	26.4714	27.649	27.335	27.911	27.0797	26.5161	27.1608	25.8827	26.8266	25.7031	22.7901	24.7701	26.2545	25.9638	26.3154	26.9685	0.822337	0.343009	0.760375	Lysyl oxidase homolog 2	LOXL2
NaN	NaN	NaN	NaN	NaN	NaN	NaN	NaN	21.9475	NaN	NaN	NaN	NaN	NaN	NaN	NaN	NaN	NaN	NaN	NaN	NaN	Lysyl oxidase homolog 3	LOXL3
31.0877	30.9566	31.0109	31.0807	30.312	30.5248	31.7949	30.8105	30.7465	30.8931	30.9846	30.7564	28.9351	29.8539	30.3655	29.0024	28.5008	29.1695	1.43377	0.232158	-0.481895	Prolow-density lipoprotein receptor-related protein 1;Low-density lipoprotein receptor-related protein 1 85 kDa subunit;Low-density lipoprotein receptor-related protein 1 515 kDa subunit;Low-density lipoprotein receptor-related protein 1 intracellular domain	LRP1
NaN	NaN	NaN	NaN	NaN	NaN	NaN	NaN	NaN	NaN	NaN	NaN	NaN	NaN	NaN	23.9051	NaN	23.7291	NaN	NaN	NaN	Latent-transforming growth factor beta-binding protein 1	LTBP1
NaN	23.5203	NaN	NaN	NaN	NaN	NaN	NaN	NaN	NaN	NaN	NaN	NaN	NaN	NaN	24.8519	24.8095	25.9221	NaN	NaN	NaN	Latent-transforming growth factor beta-binding protein 2	LTBP2
NaN	27.856	24.6614	NaN	NaN	NaN	22.7661	26.4181	26.1145	24.5234	24.3452	24.0087	26.084	NaN	25.8089	NaN	NaN	NaN	0.871301	0.257409	-1.98741	Latent-transforming growth factor beta-binding protein 4	LTBP4
NaN	NaN	NaN	NaN	NaN	NaN	22.4872	NaN	NaN	NaN	NaN	NaN	24.6349	24.1246	24.133	NaN	NaN	NaN	NaN	NaN	NaN	Lumican	LUM
NaN	NaN	NaN	NaN	NaN	NaN	21.7916	NaN	NaN	NaN	NaN	NaN	NaN	NaN	NaN	NaN	NaN	NaN	NaN	NaN	NaN	Cation-dependent mannose-6-phosphate receptor	M6PR
NaN	NaN	NaN	NaN	NaN	NaN	22.3722	NaN	NaN	NaN	NaN	NaN	NaN	NaN	NaN	NaN	NaN	NaN	NaN	NaN	NaN	Microtubule-actin cross-linking factor 1, isoforms 1/2/3/5	MACF1
NaN	NaN	NaN	25.0288	26.8621	27.4543	23.389	23.0382	22.3928	23.2818	23.9468	24.0597	NaN	NaN	NaN	NaN	NaN	25.722	1.13414	0.156459	2.3566	MAM domain-containing protein 2	MAMDC2
21.6179	21.8338	21.615	22.2556	21.3822	21.3829	24.2254	22.3714	23.1292	23.6171	22.1943	21.7959	NaN	22.1949	NaN	NaN	NaN	NaN	1.55054	0.153356	-0.667438	Mannosyl-oligosaccharide 1,2-alpha-mannosidase IA	MAN1A1
NaN	NaN	NaN	NaN	NaN	NaN	21.6492	NaN	NaN	NaN	NaN	NaN	NaN	NaN	NaN	NaN	NaN	NaN	NaN	NaN	NaN	Alpha-mannosidase 2	MAN2A1
NaN	NaN	NaN	23.4983	NaN	NaN	NaN	21.8428	NaN	22.4269	22.4891	22.6565	NaN	NaN	NaN	NaN	NaN	NaN	NaN	NaN	NaN	Lysosomal alpha-mannosidase;Lysosomal alpha-mannosidase A peptide;Lysosomal alpha-mannosidase B peptide;Lysosomal alpha-mannosidase C peptide;Lysosomal alpha-mannosidase D peptide;Lysosomal alpha-mannosidase E peptide	MAN2B1
NaN	22.0413	NaN	23.295	NaN	22.7583	NaN	NaN	NaN	22.5497	NaN	22.992	NaN	NaN	NaN	NaN	NaN	NaN	NaN	NaN	NaN	Beta-mannosidase	MANBA
NaN	NaN	NaN	22.2846	NaN	NaN	21.9909	NaN	NaN	NaN	NaN	NaN	NaN	NaN	NaN	NaN	NaN	NaN	NaN	NaN	NaN	Mitogen-activated protein kinase;Mitogen-activated protein kinase 3	MAPK3
NaN	NaN	NaN	NaN	NaN	NaN	23.828	NaN	NaN	NaN	NaN	NaN	NaN	NaN	NaN	NaN	NaN	NaN	NaN	NaN	NaN	Methionine--tRNA ligase, cytoplasmic	MARS
24.7085	23.1458	24.2541	NaN	23.1156	23.2677	23.8676	24.1381	24.7841	24.8384	24.2995	23.6712	25.7819	25.8749	25.3328	NaN	NaN	NaN	1.3479	0.113395	-2.06583	Mannan-binding lectin serine protease 1;Mannan-binding lectin serine protease 1 heavy chain;Mannan-binding lectin serine protease 1 light chain	MASP1
NaN	23.7389	NaN	NaN	NaN	NaN	NaN	24.1948	24.3943	26.022	26.3312	26.353	NaN	NaN	NaN	NaN	NaN	NaN	NaN	NaN	NaN	Matrilin-2	MATN2
NaN	NaN	NaN	22.4366	22.012	23.1395	22.4854	21.8426	21.8049	23.6058	23.5492	23.8321	NaN	NaN	NaN	NaN	NaN	NaN	NaN	NaN	NaN	Cell surface glycoprotein MUC18	MCAM
NaN	NaN	NaN	NaN	NaN	NaN	NaN	NaN	NaN	NaN	21.7109	NaN	NaN	NaN	NaN	NaN	NaN	NaN	NaN	NaN	NaN	Mucolipin-1	MCOLN1
NaN	NaN	NaN	NaN	NaN	NaN	NaN	NaN	NaN	NaN	19.0997	NaN	NaN	NaN	NaN	NaN	NaN	NaN	NaN	NaN	NaN	NADP-dependent malic enzyme	ME1
23.4598	25.8482	24.4835	NaN	NaN	NaN	26.1446	26.3219	26.0944	25.8861	24.1438	22.7365	25.3845	NaN	NaN	23.6571	NaN	23.4488	1.35438	0.117956	-1.72375	Microfibril-associated glycoprotein 4	MFAP4
28.3632	27.3269	28.4048	28.6448	28.8598	29.0837	29.7501	29.1527	29.0857	30.1559	30.1194	29.9599	27.8164	28.4355	28.4359	29.0356	28.7787	29.8534	3.2464	0.00727273	0.857776	Lactadherin;Lactadherin short form;Medin	MFGE8
NaN	NaN	NaN	NaN	NaN	NaN	25.8489	25.0995	25.2455	26.2937	26.2021	25.778	NaN	NaN	NaN	NaN	NaN	NaN	NaN	NaN	NaN		MFGE8
NaN	NaN	NaN	NaN	NaN	NaN	NaN	NaN	19.9264	NaN	NaN	NaN	NaN	NaN	NaN	NaN	NaN	NaN	NaN	NaN	NaN	Alpha-1,3-mannosyl-glycoprotein 2-beta-N-acetylglucosaminyltransferase	MGAT1
NaN	NaN	NaN	21.9832	22.2082	23.0147	NaN	21.1482	NaN	22.8615	22.2083	22.2808	NaN	NaN	NaN	NaN	NaN	NaN	NaN	NaN	NaN	Alpha-1,6-mannosylglycoprotein 6-beta-N-acetylglucosaminyltransferase A	MGAT5
NaN	25.1845	25.5083	26.6767	22.1701	24.071	26.1175	24.5513	24.9033	25.5459	25.7805	25.467	NaN	NaN	23.5147	NaN	NaN	NaN	NaN	NaN	NaN	Neprilysin	MME
26.0023	26.1296	27.528	23.8963	24.4163	24.2859	24.1452	23.2724	23.7299	NaN	22.9072	NaN	26.9109	27.5759	27.0112	23.45	NaN	NaN	3.14775	0.00266667	-3.07922	Interstitial collagenase;22 kDa interstitial collagenase;27 kDa interstitial collagenase	MMP1
NaN	NaN	NaN	NaN	NaN	NaN	21.9288	NaN	NaN	NaN	NaN	NaN	NaN	NaN	NaN	NaN	NaN	NaN	NaN	NaN	NaN	Macrophage metalloelastase	MMP12
24.3213	24.1434	24.6894	23.8701	NaN	22.5538	24.7927	22.9367	24.9351	23.6423	24.1124	25.588	NaN	NaN	24.2924	NaN	NaN	NaN	0.696339	0.351344	-1.14668	Matrix metalloproteinase-14	MMP14
NaN	22.3084	21.5463	NaN	NaN	20.7292	21.2808	NaN	21.9067	21.1708	20.898	NaN	NaN	NaN	NaN	NaN	NaN	NaN	NaN	NaN	NaN	Matrix metalloproteinase-19	MMP19
31.2854	32.7415	31.6089	31.015	30.2211	31.4397	30.9443	32.0909	32.5941	31.7366	32.0094	32.2391	30.9171	30.1	31.7037	29.0345	29.7531	29.0869	1.13868	0.231733	-0.827833	72 kDa type IV collagenase;PEX	MMP2
25.3208	25.0079	26.0731	23.9251	24.1381	24.2062	25.4104	24.2824	24.9459	24.0564	22.3352	23.4581	25.2422	25.9392	25.8987	NaN	NaN	NaN	2.83298	0.00114286	-2.51187	Stromelysin-1	MMP3
22.249	22.5341	NaN	21.7959	NaN	21.6122	22.0425	21.2897	21.8132	21.4981	21.2118	21.553	21.966	21.7112	21.8304	21.8648	NaN	21.8826	1.68716	0.29556	-0.28271	C-type mannose receptor 2	MRC2
NaN	NaN	19.9255	NaN	NaN	NaN	19.8174	21.0471	22.0458	22.1701	21.6779	NaN	NaN	NaN	NaN	NaN	NaN	NaN	NaN	NaN	NaN	Mas-related G-protein coupled receptor member F	MRGPRF
23.8269	24.0666	24.5035	24.5934	24.0769	24.7293	23.7222	23.5917	22.9652	24.8388	23.9449	24.7558	23.031	NaN	22.7643	23.3564	23.5005	22.978	1.43186	0.137429	0.916414	Moesin	MSN
27.2526	28.8274	27.7376	28.4908	27.4671	28.317	31.11	28.7402	27.7605	28.2385	27.9505	27.1946	NaN	25.2147	26.9513	NaN	NaN	NaN	1.20326	0.154133	-1.5942	Major vault protein	MVP
NaN	NaN	NaN	NaN	NaN	NaN	NaN	NaN	NaN	NaN	NaN	20.7361	NaN	NaN	NaN	NaN	NaN	NaN	NaN	NaN	NaN	Matrix-remodeling-associated protein 8	MXRA8
NaN	NaN	NaN	23.5865	NaN	23.5042	23.7954	NaN	22.9248	NaN	23.2376	NaN	NaN	NaN	NaN	NaN	NaN	NaN	NaN	NaN	NaN	Myeloid-associated differentiation marker	MYADM
22.8422	27.2422	25.0029	27.9485	26.9834	27.4182	28.0928	27.4722	26.6046	28.0649	27.5848	27.7729	24.843	23.1764	22.8259	24.0879	23.5412	26.6938	1.07218	0.205425	1.33262	Myosin-9	MYH9
NaN	NaN	NaN	22.7853	NaN	NaN	22.6178	NaN	NaN	NaN	NaN	NaN	NaN	NaN	NaN	NaN	NaN	NaN	NaN	NaN	NaN	Unconventional myosin-Ib	MYO1B
NaN	21.1822	21.9412	23.2336	21.7072	22.0727	23.5268	21.8647	21.8838	23.5301	22.1041	21.6217	NaN	NaN	NaN	NaN	NaN	NaN	NaN	NaN	NaN	Unconventional myosin-Ic	MYO1C
NaN	24.5443	25.6419	26.2321	22.8734	25.2431	26.059	24.7121	25.2695	25.8795	25.6663	26.6788	NaN	NaN	NaN	NaN	NaN	NaN	NaN	NaN	NaN	Myoferlin	MYOF
NaN	NaN	NaN	NaN	NaN	NaN	21.1081	NaN	NaN	NaN	20.0845	NaN	NaN	NaN	NaN	NaN	NaN	NaN	NaN	NaN	NaN	N-acetyl-D-glucosamine kinase	NAGK
24.1848	24.3233	24.9022	25.2575	23.3193	23.886	23.9543	23.7415	24.0864	24.5267	24.3277	24.9333	21.8329	23.449	24.3055	NaN	NaN	NaN	0.675526	0.376089	-0.769239	Alpha-N-acetylglucosaminidase;Alpha-N-acetylglucosaminidase 82 kDa form;Alpha-N-acetylglucosaminidase 77 kDa form	NAGLU
NaN	NaN	22.5875	NaN	NaN	NaN	NaN	NaN	NaN	NaN	NaN	NaN	NaN	NaN	NaN	NaN	NaN	NaN	NaN	NaN	NaN	Nicotinamide phosphoribosyltransferase	NAMPT
NaN	20.5532	NaN	NaN	NaN	NaN	NaN	24.6512	NaN	20.3731	NaN	NaN	NaN	NaN	NaN	NaN	NaN	NaN	NaN	NaN	NaN	F-box only protein 50	NCCRP1
NaN	20.5748	NaN	21.5	21.0638	21.2216	23.0366	20.2652	NaN	20.9488	20.9768	NaN	NaN	NaN	NaN	NaN	NaN	NaN	NaN	NaN	NaN	Nck-associated protein 1	NCKAP1
NaN	21.4938	NaN	NaN	NaN	NaN	22.291	NaN	21.597	NaN	NaN	NaN	NaN	NaN	NaN	NaN	NaN	NaN	NaN	NaN	NaN	Nucleolin	NCL
NaN	23.7701	25.7234	25.5331	NaN	23.3527	23.9162	22.3663	23.7437	23.625	24.0364	24.9239	NaN	NaN	22.8826	NaN	NaN	NaN	NaN	NaN	NaN	Nicastrin	NCSTN
NaN	NaN	NaN	NaN	NaN	NaN	NaN	NaN	NaN	NaN	NaN	NaN	NaN	NaN	17.9076	NaN	NaN	NaN	NaN	NaN	NaN	NEDD4 family-interacting protein 1	NDFIP1
NaN	NaN	NaN	NaN	NaN	NaN	NaN	NaN	NaN	NaN	NaN	NaN	NaN	NaN	NaN	NaN	NaN	24.5513	NaN	NaN	NaN	Nance-Horan syndrome protein	NHS
30.4131	31.069	29.6257	28.9975	29.4125	29.8451	29.8371	30.8243	30.4814	30.2038	30.3018	29.831	30.9717	30.1294	30.936	29.6487	29.196	29.0028	1.94048	0.0787097	-0.872033	Nidogen-1	NID1
27.0629	29.2189	28.4481	27.267	26.8158	27.9105	27.9003	29.4931	29.4715	28.3632	27.6409	28.3481	28.5996	26.9722	28.3026	22.6026	22.4683	22.7392	1.70686	0.0521667	-2.36818	Nidogen-2	NID2
NaN	NaN	NaN	NaN	NaN	NaN	NaN	NaN	NaN	31.9837	31.9088	NaN	NaN	NaN	NaN	33.6884	33.1404	32.9039	NaN	NaN	NaN	Nucleolar protein 8	NOL8
NaN	NaN	NaN	NaN	NaN	NaN	NaN	NaN	NaN	NaN	NaN	18.1912	NaN	NaN	NaN	NaN	NaN	NaN	NaN	NaN	NaN	Neurogenic locus notch homolog protein 2;Notch 2 extracellular truncation;Notch 2 intracellular domain	NOTCH2
25.137	26.2355	27.7576	28.0318	24.77	26.4428	27.7457	27.2871	27.2586	27.8975	27.6119	27.6867	NaN	24.3759	25.0323	NaN	NaN	NaN	0.599729	0.381691	-0.957362	Niemann-Pick C1 protein	NPC1
NaN	23.4228	24.4664	23.5444	NaN	NaN	23.4179	NaN	22.6893	22.4948	NaN	23.2226	NaN	NaN	NaN	NaN	NaN	NaN	NaN	NaN	NaN	Neuroplastin	NPTN;DKFZp566H1924
21.9714	22.2849	NaN	23.7707	25.3887	24.1694	26.281	20.5751	NaN	NaN	NaN	NaN	NaN	NaN	21.3378	NaN	NaN	NaN	NaN	NaN	NaN	Neuronal pentraxin-1	NPTX1
NaN	22.2506	NaN	23.0702	NaN	23.375	24.4016	NaN	NaN	22.979	22.4323	NaN	NaN	NaN	NaN	NaN	NaN	NaN	NaN	NaN	NaN	NAD(P)H dehydrogenase [quinone] 1	NQO1
NaN	23.9448	22.6082	NaN	NaN	NaN	NaN	22.5114	NaN	NaN	NaN	NaN	NaN	NaN	22.9302	NaN	22.4865	22.5667	NaN	NaN	NaN	Neuropilin-1	NRP1
NaN	NaN	NaN	NaN	NaN	NaN	NaN	NaN	NaN	22.308	22.0379	21.8955	NaN	NaN	NaN	NaN	NaN	NaN	NaN	NaN	NaN	Neuropilin-2	NRP2
NaN	NaN	NaN	NaN	NaN	NaN	NaN	NaN	NaN	NaN	NaN	NaN	NaN	NaN	NaN	NaN	NaN	25.1174	NaN	NaN	NaN	Histone-lysine N-methyltransferase, H3 lysine-36 and H4 lysine-20 specific	NSD1
NaN	21.3803	NaN	22.2722	NaN	21.8003	22.303	21.2857	21.027	21.9385	21.8115	21.4971	NaN	NaN	NaN	NaN	NaN	NaN	NaN	NaN	NaN	Cytosolic purine 5-nucleotidase	NT5C2
24.0926	25.0147	26.0144	25.8784	26.0131	26.9793	25.186	24.7562	24.8394	25.9199	26.1381	25.6043	NaN	NaN	22.8566	NaN	NaN	NaN	0.044483	0.952723	0.072926	5-nucleotidase	NT5E
NaN	NaN	NaN	NaN	NaN	NaN	NaN	NaN	NaN	NaN	NaN	NaN	NaN	NaN	22.1019	NaN	NaN	NaN	NaN	NaN	NaN	Nucleobindin-2;Nesfatin-1	NUCB2;Nucb2;HEL-S-109
NaN	24.5744	24.2249	NaN	NaN	NaN	23.6271	24.3669	24.356	23.2975	23.1379	23.1293	24.4355	23.6917	24.3793	24.6139	23.9442	24.3453	0.941196	0.313608	-0.643183	Olfactomedin-like protein 3	OLFML3
NaN	NaN	NaN	NaN	NaN	NaN	NaN	NaN	NaN	NaN	NaN	21.9684	NaN	NaN	NaN	NaN	NaN	NaN	NaN	NaN	NaN	Oncostatin-M-specific receptor subunit beta	OSMR
NaN	NaN	NaN	NaN	NaN	NaN	NaN	NaN	NaN	NaN	NaN	NaN	NaN	17.8596	NaN	NaN	NaN	NaN	NaN	NaN	NaN	P2X purinoceptor;P2X purinoceptor 4	P2RX4
NaN	NaN	NaN	NaN	NaN	NaN	NaN	17.1056	NaN	NaN	NaN	NaN	NaN	NaN	NaN	NaN	NaN	NaN	NaN	NaN	NaN	Prolyl 4-hydroxylase subunit alpha-2	P4HA2
NaN	NaN	NaN	22.3872	NaN	21.9879	23.4796	NaN	NaN	NaN	NaN	NaN	NaN	NaN	NaN	NaN	NaN	NaN	NaN	NaN	NaN	Polyadenylate-binding protein;Polyadenylate-binding protein 1;Polyadenylate-binding protein 4	PABPC1;PABPC4
NaN	21.6651	22.3526	22.5013	22.1624	21.9105	22.0682	21.5237	NaN	22.6393	NaN	NaN	NaN	NaN	NaN	NaN	NaN	NaN	NaN	NaN	NaN	Multifunctional protein ADE2;Phosphoribosylaminoimidazole-succinocarboxamide synthase;Phosphoribosylaminoimidazole carboxylase	PAICS
26.1255	26.4217	25.5286	24.9892	23.7393	25.1339	26.5686	27.1157	26.382	25.881	25.6664	25.414	25.8342	24.1409	27.2602	NaN	NaN	NaN	2.2007	0.0123077	-2.46938	Inactive serine protease PAMR1	PAMR1
26.336	27.418	26.079	26.3308	24.4451	25.7733	27.2654	28.2095	27.6266	23.6869	24.0918	NaN	27.1584	27.4293	27.4778	26.895	26.6281	27.7498	1.44353	0.0996667	-2.08944	Pappalysin-1	PAPPA
NaN	22.1632	20.1893	21.7581	NaN	20.4143	25.7066	20.7148	NaN	NaN	19.8173	19.7152	NaN	NaN	NaN	NaN	NaN	NaN	NaN	NaN	NaN	Poly [ADP-ribose] polymerase 4	PARP4
NaN	NaN	NaN	NaN	NaN	NaN	NaN	NaN	NaN	NaN	NaN	NaN	NaN	NaN	NaN	NaN	NaN	20.8079	NaN	NaN	NaN	Protein piccolo	PCLO
27.1143	28.0768	27.1282	25.3314	25.0951	25.845	27.1755	27.7556	27.7135	27.4184	27.2189	26.5856	26.6927	25.7167	27.5813	27.4309	27.4066	27.2364	0.629058	0.399447	-0.598478	Procollagen C-endopeptidase enhancer 1	PCOLCE
NaN	NaN	NaN	NaN	NaN	22.8443	NaN	NaN	NaN	NaN	NaN	NaN	NaN	NaN	NaN	NaN	NaN	NaN	NaN	NaN	NaN	Proprotein convertase subtilisin/kexin type 6	PCSK6
NaN	20.9865	NaN	NaN	NaN	21.5427	21.4792	21.3315	21.4949	NaN	NaN	NaN	NaN	NaN	NaN	NaN	NaN	NaN	NaN	NaN	NaN	Programmed cell death protein 6	PDCD6
25.35	26.449	26.5962	26.6303	26.0317	26.4366	26.9381	26.5452	26.2542	26.3623	26.2048	26.1213	NaN	23.9594	25.4065	NaN	NaN	23.7477	0.957633	0.262681	-0.9167	Programmed cell death 6-interacting protein	PDCD6IP
27.8881	26.9285	27.5009	27.6802	27.6792	26.2353	27.4823	26.5901	NaN	26.8757	26.8978	26.7979	NaN	26.385	28.0727	28.103	NaN	28.5005	0.225733	0.667096	0.691444	cGMP-specific 3,5-cyclic phosphodiesterase	PDE5A
NaN	NaN	NaN	NaN	NaN	NaN	22.2166	NaN	NaN	NaN	NaN	NaN	NaN	NaN	NaN	NaN	NaN	NaN	NaN	NaN	NaN	Platelet-derived growth factor receptor alpha	PDGFRA
NaN	NaN	NaN	NaN	NaN	NaN	22.6813	21.9654	22.7346	22.3797	22.4811	23.3203	NaN	NaN	NaN	NaN	NaN	NaN	NaN	NaN	NaN	Platelet-derived growth factor receptor beta	PDGFRB
NaN	NaN	NaN	NaN	NaN	NaN	22.1469	NaN	NaN	NaN	21.2994	NaN	NaN	NaN	NaN	NaN	NaN	NaN	NaN	NaN	NaN	Protein disulfide-isomerase A3	PDIA3
NaN	NaN	NaN	NaN	NaN	NaN	23.4814	NaN	NaN	NaN	NaN	NaN	NaN	NaN	NaN	NaN	NaN	NaN	NaN	NaN	NaN	ATP-dependent 6-phosphofructokinase, liver type	PFKL
NaN	NaN	NaN	NaN	NaN	NaN	20.8418	NaN	NaN	NaN	NaN	NaN	NaN	NaN	NaN	NaN	NaN	NaN	NaN	NaN	NaN	ATP-dependent 6-phosphofructokinase, platelet type	PFKP
NaN	NaN	NaN	NaN	NaN	NaN	NaN	NaN	NaN	NaN	NaN	21.0405	NaN	NaN	NaN	NaN	NaN	NaN	NaN	NaN	NaN	Phosphoglycerate mutase 2;Phosphoglycerate mutase 1;Probable phosphoglycerate mutase 4	PGAM2;PGAM1;PGAM4
NaN	NaN	NaN	23.7397	22.9115	23.0454	23.2029	NaN	NaN	23.7324	22.9257	23.1936	NaN	22.6564	NaN	NaN	NaN	NaN	NaN	NaN	NaN	6-phosphogluconate dehydrogenase, decarboxylating	PGD
NaN	22.6045	23.1155	24.8458	22.4251	23.0664	24.8627	22.1504	21.6805	23.8299	22.3926	22.6799	NaN	NaN	NaN	NaN	NaN	NaN	NaN	NaN	NaN	Phosphoglycerate kinase 1	PGK1
NaN	NaN	NaN	NaN	NaN	NaN	20.5157	NaN	NaN	NaN	NaN	NaN	NaN	NaN	NaN	NaN	NaN	NaN	NaN	NaN	NaN	Phosphatidylinositol 4-kinase type 2-alpha	PI4K2A
23.4871	NaN	NaN	NaN	NaN	NaN	NaN	22.4471	NaN	NaN	NaN	NaN	NaN	NaN	NaN	NaN	NaN	NaN	NaN	NaN	NaN	Prolactin-inducible protein	PIP
23.2395	25.5352	25.8854	27.9079	26.2227	27.5757	28.6277	25.1994	24.6228	26.8992	25.7744	25.8985	NaN	23.753	22.5261	24.7435	23.9085	25.719	1.29736	0.126939	1.82868	Pyruvate kinase PKM;Pyruvate kinase	PKM
NaN	NaN	NaN	NaN	NaN	NaN	20.1517	NaN	NaN	NaN	NaN	NaN	NaN	NaN	NaN	NaN	NaN	NaN	NaN	NaN	NaN	Pyruvate kinase PKM;Pyruvate kinase	PKM
26.7197	28.185	28.61	26.9349	27.0409	26.5961	27.0266	27.1759	26.5203	27.7994	28.0715	28.2982	27.4027	27.5889	27.5841	NaN	NaN	NaN	1.00189	0.205486	-2.57917	Tissue-type plasminogen activator;Tissue-type plasminogen activator chain A;Tissue-type plasminogen activator chain B	PLAT
NaN	23.4636	24.6407	23.3732	24.1472	22.8824	23.1189	22.3671	21.9524	23.3031	23.5413	23.4576	NaN	23.033	22.7503	NaN	NaN	NaN	0.0365913	0.957109	0.0761509	Urokinase-type plasminogen activator;Urokinase-type plasminogen activator long chain A;Urokinase-type plasminogen activator short chain A;Urokinase-type plasminogen activator chain B	PLAU
NaN	NaN	NaN	NaN	NaN	NaN	NaN	22.5187	NaN	NaN	NaN	NaN	NaN	NaN	NaN	NaN	NaN	NaN	NaN	NaN	NaN	Phospholipase B-like 1;Phospholipase B-like 1 chain A;Phospholipase B-like 1 chain B;Phospholipase B-like 1 chain C	PLBD1
NaN	NaN	NaN	NaN	NaN	NaN	22.3898	NaN	22.5211	23.2859	22.9095	23.8844	NaN	NaN	NaN	NaN	NaN	NaN	NaN	NaN	NaN	Phospholipase D3	PLD3
NaN	23.6362	NaN	25.6277	24.1303	24.4299	28.1537	22.2492	20.9992	23.0839	21.9566	21.5941	NaN	NaN	NaN	22.5146	NaN	24.4243	0.637916	0.36794	1.25877	Plectin	PLEC
NaN	NaN	NaN	NaN	NaN	NaN	21.247	21.0701	NaN	22.1494	21.9187	NaN	NaN	NaN	NaN	NaN	NaN	NaN	NaN	NaN	NaN	Pleckstrin homology domain-containing family B member 2	PLEKHB2
25.9726	26.4538	26.6473	26.0489	26.2355	27.1476	26.2791	25.472	25.7026	26.2334	26.1875	26.2538	23.9765	24.4585	25.8865	26.0339	25.0258	25.7359	1.05501	0.32739	0.45038	Procollagen-lysine,2-oxoglutarate 5-dioxygenase 1	PLOD1
NaN	NaN	NaN	NaN	NaN	NaN	21.0835	NaN	NaN	NaN	NaN	NaN	NaN	NaN	NaN	NaN	NaN	NaN	NaN	NaN	NaN	Procollagen-lysine,2-oxoglutarate 5-dioxygenase 2	PLOD2
26.0501	26.7459	27.5313	25.7736	26.0497	26.9612	24.706	25.1404	25.8979	26.5204	26.1627	26.115	24.5626	24.0261	26.263	23.4173	NaN	23.7256	0.53807	0.451534	-0.602014	Procollagen-lysine,2-oxoglutarate 5-dioxygenase 3	PLOD3
NaN	NaN	NaN	24.202	NaN	23.549	23.3283	22.9457	23.1353	24.4492	24.5907	24.3246	NaN	NaN	NaN	NaN	NaN	NaN	NaN	NaN	NaN	Phospholipid scramblase 1	PLSCR1
NaN	22.768	23.1727	23.9097	23.7874	24.3988	23.7998	23.4945	23.3537	24.0739	23.9336	23.8019	NaN	NaN	NaN	NaN	NaN	NaN	NaN	NaN	NaN	Phospholipid scramblase 3	PLSCR3;TMEM256-PLSCR3
NaN	NaN	NaN	NaN	NaN	NaN	NaN	22.5253	NaN	NaN	NaN	NaN	NaN	NaN	NaN	NaN	NaN	NaN	NaN	NaN	NaN	Phospholipid transfer protein	PLTP
NaN	NaN	21.5415	21.3379	NaN	21.2617	21.4112	21.2144	21.3668	NaN	21.7707	21.7411	NaN	NaN	NaN	NaN	NaN	NaN	NaN	NaN	NaN	Plexin-B2	PLXNB2
24.351	24.827	23.8696	25.3945	24.7045	25.8915	25.9856	24.9886	25.0471	26.6918	25.7136	25.9956	NaN	NaN	25.0327	NaN	NaN	NaN	0.0410706	0.951253	-0.0805346	Podocan	PODN
NaN	22.4697	NaN	NaN	NaN	NaN	24.5746	24.8573	23.3647	NaN	NaN	NaN	25.1647	25.3767	NaN	27.4395	27.4948	28.6724	NaN	NaN	NaN	Periostin	POSTN
22.6292	22.6009	22.7026	23.5049	21.2313	21.7966	23.9262	22.457	22.6106	22.6391	22.6879	22.7894	NaN	NaN	21.067	NaN	NaN	NaN	5.18999e-05	0.999875	6.23067e-05	Lipid phosphate phosphohydrolase 1	PPAP2A
25.4003	25.6924	25.6451	25.7946	23.4625	23.9644	25.8519	24.7766	24.9141	25.1404	25.1472	25.468	NaN	NaN	22.3533	NaN	NaN	NaN	0.795841	0.349032	-0.614359	Lipid phosphate phosphohydrolase 3	PPAP2B
NaN	NaN	NaN	NaN	NaN	NaN	NaN	NaN	NaN	NaN	NaN	NaN	NaN	NaN	NaN	NaN	NaN	21.9776	NaN	NaN	NaN	Peptidyl-prolyl cis-trans isomerase;Peptidyl-prolyl cis-trans isomerase A;Peptidyl-prolyl cis-trans isomerase A, N-terminally processed;Peptidyl-prolyl cis-trans isomerase A-like 4A/B/C;Peptidyl-prolyl cis-trans isomerase A-like 4D	PPIA;PPIAL4C;PPIAL4E;PPIAL4A;PPIAL4D
NaN	NaN	NaN	NaN	NaN	NaN	NaN	NaN	NaN	NaN	NaN	NaN	NaN	NaN	NaN	NaN	NaN	20.7816	NaN	NaN	NaN	Peptidyl-prolyl cis-trans isomerase B	PPIB
NaN	NaN	NaN	21.744	20.9957	21.4865	22.3645	NaN	NaN	21.0044	20.7978	21.2241	NaN	NaN	NaN	NaN	NaN	21.0135	0.0209719	0.970582	0.0328236	Serine/threonine-protein phosphatase PP1-alpha catalytic subunit;Serine/threonine-protein phosphatase PP1-gamma catalytic subunit;Serine/threonine-protein phosphatase PP1-beta catalytic subunit;Serine/threonine-protein phosphatase	PPP1CA;PPP1CC;PPP1CB
NaN	NaN	NaN	NaN	NaN	NaN	NaN	NaN	NaN	NaN	NaN	NaN	NaN	NaN	22.6112	NaN	NaN	NaN	NaN	NaN	NaN	Protein phosphatase 1 regulatory subunit 36	PPP1R36
NaN	NaN	NaN	NaN	NaN	NaN	NaN	NaN	NaN	21.8636	NaN	NaN	NaN	NaN	NaN	NaN	NaN	NaN	NaN	NaN	NaN	Serine/threonine-protein phosphatase 2A catalytic subunit alpha isoform;Serine/threonine-protein phosphatase 2A catalytic subunit beta isoform;Serine/threonine-protein phosphatase;Serine/threonine-protein phosphatase 4 catalytic subunit	PPP2CA;PPP2CB;PPP4C
NaN	NaN	NaN	NaN	NaN	NaN	NaN	NaN	NaN	NaN	NaN	NaN	NaN	NaN	NaN	NaN	NaN	19.8561	NaN	NaN	NaN	Serine/threonine-protein phosphatase 2A 65 kDa regulatory subunit A beta isoform;Serine/threonine-protein phosphatase 2A 65 kDa regulatory subunit A alpha isoform	PPP2R1B;PPP2R1A
NaN	NaN	NaN	NaN	NaN	NaN	NaN	NaN	NaN	NaN	NaN	18.1017	NaN	NaN	NaN	NaN	NaN	NaN	NaN	NaN	NaN	Serine/threonine-protein phosphatase 2A 55 kDa regulatory subunit B beta isoform;Serine/threonine-protein phosphatase 2A 55 kDa regulatory subunit B alpha isoform;Serine/threonine-protein phosphatase 2A 55 kDa regulatory subunit B delta isoform	PPP2R2A;PPP2R2B;PPP2R2D
NaN	22.3875	22.6777	24.2804	22.0561	23.1411	23.4695	22.4662	22.6319	23.3023	22.9599	23.1414	21.1987	22.3766	NaN	NaN	NaN	NaN	0.953481	0.312816	0.613509	Lysosomal Pro-X carboxypeptidase	PRCP
NaN	NaN	NaN	NaN	NaN	NaN	NaN	23.4397	NaN	23.6312	23.172	NaN	NaN	NaN	NaN	NaN	NaN	NaN	NaN	NaN	NaN	Peroxiredoxin-1	PRDX1
NaN	20.036	NaN	21.9908	20.1662	20.3404	25.7945	21.0886	NaN	20.5336	21.1438	21.2844	NaN	NaN	NaN	NaN	NaN	20.0829	0.187019	0.720642	-0.366489	DNA-dependent protein kinase catalytic subunit	PRKDC
NaN	NaN	NaN	NaN	NaN	NaN	20.9646	NaN	NaN	NaN	NaN	NaN	NaN	NaN	NaN	NaN	NaN	NaN	NaN	NaN	NaN	cGMP-dependent protein kinase 1	PRKG1
NaN	NaN	NaN	21.7611	NaN	NaN	22.7027	NaN	NaN	21.8896	21.5802	NaN	NaN	NaN	NaN	NaN	NaN	NaN	NaN	NaN	NaN	Protein arginine N-methyltransferase 1	PRMT1
NaN	NaN	NaN	23.1437	23.2027	23.3656	NaN	NaN	NaN	NaN	NaN	NaN	NaN	NaN	NaN	NaN	NaN	NaN	NaN	NaN	NaN	Major prion protein	PRNP
NaN	NaN	NaN	NaN	NaN	NaN	NaN	NaN	NaN	NaN	21.2904	NaN	NaN	NaN	NaN	NaN	NaN	NaN	NaN	NaN	NaN	Vitamin K-dependent protein S	PROS1
NaN	NaN	NaN	22.0862	NaN	NaN	23.228	NaN	NaN	21.9015	21.8747	NaN	NaN	NaN	NaN	NaN	NaN	NaN	NaN	NaN	NaN	Pre-mRNA-processing factor 19	PRPF19
NaN	NaN	21.399	21.6828	21.5339	21.9117	22.8393	NaN	NaN	NaN	NaN	NaN	NaN	NaN	NaN	21.4754	NaN	21.5393	NaN	NaN	NaN	Serine protease 23	PRSS23
29.5561	28.3777	28.9055	28.6824	29.0551	28.4296	28.472	24.4621	29.2559	29.3654	29.5046	28.2903	29.7497	29.3474	29.3501	29.3104	29.4954	24.653	0.0317384	0.956448	-0.0766826	Putative trypsin-6;Trypsin-2;Trypsin-1;Alpha-trypsin chain 1;Alpha-trypsin chain 2	PRSS3P2;PRSS1;PRSS2
NaN	NaN	NaN	NaN	NaN	NaN	NaN	NaN	NaN	NaN	NaN	NaN	NaN	NaN	NaN	NaN	NaN	18.2437	NaN	NaN	NaN	Prosaposin;Saposin-A;Saposin-B-Val;Saposin-B;Saposin-C;Saposin-D	PSAP
NaN	NaN	NaN	NaN	NaN	23.5807	NaN	NaN	NaN	NaN	NaN	NaN	NaN	NaN	NaN	NaN	NaN	NaN	NaN	NaN	NaN	Pregnancy-specific beta-1-glycoprotein 4	PSG4
NaN	23.2058	23.5524	24.7423	NaN	23.8374	24.8184	22.9095	NaN	23.8324	23.2359	23.6877	NaN	NaN	NaN	NaN	NaN	NaN	NaN	NaN	NaN	Proteasome subunit beta type;Proteasome subunit beta type-8	PSM8;PSMB8
24.5492	25.0826	24.8911	25.7379	25.9993	25.531	27.3549	24.5253	24.3907	25.5957	24.9789	24.765	22.2568	22.8202	22.9359	NaN	NaN	21.308	0.518985	0.457786	-0.592183	Proteasome subunit alpha type-1;Proteasome subunit alpha type	PSMA1
25.2367	25.5781	25.8487	26.9744	26.7367	26.6169	26.8459	25.313	25.0131	26.5594	25.9956	26.0703	24.6544	25.7407	24.1738	25.1059	24.1579	24.9313	0.857706	0.354441	0.5271	Proteasome subunit alpha type;Proteasome subunit alpha type-2	PSMA2
24.7444	25.3678	25.3502	26.9732	26.3765	26.0855	26.4345	25.0371	24.7233	26.0746	25.5998	25.8202	NaN	24.9673	24.7824	NaN	NaN	24.2686	0.0755501	0.900106	0.123676	Proteasome subunit alpha type-3	PSMA3
NaN	25.1883	24.3175	26.2193	26.0087	25.0128	25.3684	24.3936	24.1532	25.9178	25.0929	25.4196	NaN	NaN	NaN	24.4244	24.986	24.3348	2.02598	0.02	2.4353	Proteasome subunit alpha type-4;Proteasome subunit alpha type;Proteasome subunit beta type	PSMA4
NaN	24.0679	24.0891	25.8573	25.3882	24.9444	25.5637	23.8399	23.2633	25.0008	24.7886	24.604	NaN	24.5078	24.5695	23.3962	NaN	23.5362	0.319981	0.584654	0.610074	Proteasome subunit alpha type-5	PSMA5
25.8655	26.3172	26.4471	27.8872	27.4795	26.7089	27.2143	25.8948	25.214	26.7468	26.4037	26.7073	25.3926	26.2227	26.3451	26.0722	24.8217	25.728	0.524734	0.475311	0.404643	Proteasome subunit alpha type-6;Proteasome subunit alpha type	PSMA6
25.9958	26.0219	26.4354	28.0232	27.2997	26.8768	27.3826	25.6751	25.6589	27.0453	26.4043	26.7925	24.8778	26.1044	26.0464	25.5665	24.7742	25.4433	0.63208	0.424608	0.447514	Proteasome subunit alpha type-7	PSMA7
24.7418	25.7243	25.5094	27.2129	26.6195	26.1659	26.3448	25.2606	25.1091	26.6027	25.8652	26.0197	24.1173	25.5506	25.7148	25.053	23.405	24.9675	0.462304	0.503936	0.42651	Proteasome subunit beta type-1	PSMB1
NaN	22.4432	NaN	23.1699	NaN	NaN	22.8964	NaN	NaN	23.1399	22.6112	NaN	NaN	NaN	NaN	NaN	NaN	NaN	NaN	NaN	NaN	Proteasome subunit beta type-10	PSMB10
NaN	24.0957	24.1046	25.2512	24.7128	24.9871	25.0637	24.0125	23.8726	25.2405	24.1021	24.2662	NaN	NaN	NaN	NaN	NaN	NaN	NaN	NaN	NaN	Proteasome subunit beta type-2	PSMB2
23.4913	24.3687	24.0212	25.7586	25.3099	25.0175	25.7767	23.6344	24.1605	24.6629	24.7301	24.6173	NaN	22.8654	24.1812	23.0024	NaN	23.2999	0.545287	0.455181	0.522251	Proteasome subunit beta type-3	PSMB3
24.2683	24.2133	24.1723	25.6415	24.7859	25.2721	25.2797	23.4491	23.6176	24.3191	24.0889	24.9119	NaN	24.2134	24.3049	24.2646	NaN	NaN	0.0405997	0.952765	0.104361	Proteasome subunit beta type-4	PSMB4
NaN	24.9146	25.2038	26.2854	25.887	25.0624	25.8876	24.3765	24.2346	25.221	24.942	25.3628	24.1923	24.2935	24.3687	24.4843	23.8789	24.2396	0.645865	0.385388	0.668325	Proteasome subunit beta type-5	PSMB5
24.2552	24.238	24.732	26.0806	25.6565	25.3398	25.649	22.919	24.2055	25.2535	24.5318	24.8598	NaN	NaN	24.101	NaN	NaN	NaN	0.00256486	1	0.00482263	Proteasome subunit beta type-6	PSMB6
NaN	22.3817	NaN	23.4681	22.8999	22.3964	23.6275	22.1739	NaN	22.5714	22.8832	NaN	NaN	NaN	NaN	NaN	NaN	NaN	NaN	NaN	NaN	Proteasome subunit beta type-7	PSMB7
NaN	22.372	NaN	23.6749	23.375	22.9872	23.6515	NaN	NaN	22.7337	22.1926	22.9286	NaN	NaN	NaN	NaN	NaN	NaN	NaN	NaN	NaN	Proteasome subunit beta type;Proteasome subunit beta type-9	PSMB9
NaN	NaN	NaN	NaN	NaN	NaN	23.7428	NaN	NaN	NaN	NaN	NaN	NaN	NaN	NaN	NaN	NaN	NaN	NaN	NaN	NaN	26S protease regulatory subunit 4	PSMC1
NaN	21.7721	NaN	22.7186	21.9256	NaN	24.8445	NaN	NaN	NaN	NaN	NaN	NaN	NaN	NaN	NaN	NaN	NaN	NaN	NaN	NaN	26S protease regulatory subunit 7	PSMC2
NaN	NaN	NaN	22.9823	NaN	NaN	23.0335	NaN	NaN	21.8983	NaN	NaN	NaN	NaN	NaN	NaN	NaN	NaN	NaN	NaN	NaN	26S protease regulatory subunit 6A	PSMC3
NaN	NaN	19.9332	NaN	20.5988	20.2189	24.3035	19.6468	NaN	20.4379	NaN	NaN	NaN	NaN	NaN	NaN	NaN	NaN	NaN	NaN	NaN	26S protease regulatory subunit 6B	PSMC4
NaN	21.2432	NaN	22.7814	21.3076	NaN	25.5807	NaN	NaN	20.8691	NaN	NaN	NaN	NaN	NaN	NaN	NaN	NaN	NaN	NaN	NaN	26S protease regulatory subunit 8	PSMC5
NaN	NaN	NaN	24.075	NaN	21.2069	25.6575	19.4754	NaN	NaN	20.5357	20.414	NaN	NaN	NaN	NaN	NaN	NaN	NaN	NaN	NaN	26S protease regulatory subunit 10B	PSMC6
NaN	22.0134	NaN	23.6066	22.2815	NaN	23.5298	NaN	NaN	22.0926	21.6624	21.8454	NaN	NaN	NaN	NaN	NaN	21.7047	NaN	NaN	NaN	26S proteasome non-ATPase regulatory subunit 1	PSMD1
NaN	NaN	NaN	NaN	NaN	NaN	23.3138	NaN	NaN	NaN	NaN	NaN	NaN	NaN	NaN	NaN	NaN	NaN	NaN	NaN	NaN	26S proteasome non-ATPase regulatory subunit 11	PSMD11
NaN	NaN	NaN	23.5503	22.1823	22.8691	26.3822	NaN	NaN	23.0264	NaN	21.8948	NaN	NaN	NaN	NaN	NaN	NaN	NaN	NaN	NaN	26S proteasome non-ATPase regulatory subunit 12	PSMD12
21.8724	22.6673	22.1534	24.7202	23.9881	23.5755	25.5676	NaN	NaN	23.6468	22.7586	22.9064	NaN	NaN	NaN	NaN	NaN	23.0273	0.711909	0.362687	0.740323	26S proteasome non-ATPase regulatory subunit 13	PSMD13
NaN	NaN	NaN	22.2101	NaN	NaN	23.5352	NaN	NaN	21.9198	21.2783	NaN	NaN	NaN	NaN	NaN	NaN	NaN	NaN	NaN	NaN	26S proteasome non-ATPase regulatory subunit 14	PSMD14
NaN	22.7032	21.4498	25.2726	23.8393	23.8937	26.741	NaN	20.9256	23.7051	23.037	22.86	NaN	NaN	22.182	NaN	NaN	21.392	0.71927	0.35127	1.1288	26S proteasome non-ATPase regulatory subunit 2	PSMD2
NaN	23.2687	21.8358	25.3644	24.3956	24.3452	25.9676	NaN	NaN	24.1853	23.1035	NaN	NaN	NaN	NaN	NaN	NaN	NaN	NaN	NaN	NaN	26S proteasome non-ATPase regulatory subunit 3	PSMD3
NaN	22.706	NaN	24.8995	23.8434	23.6466	25.7607	21.4002	21.5703	23.4916	23.3655	22.5894	NaN	NaN	NaN	NaN	NaN	NaN	NaN	NaN	NaN	26S proteasome non-ATPase regulatory subunit 6	PSMD6
NaN	21.4493	21.6084	23.4946	22.6463	22.2553	25.1227	21.0417	NaN	23.2731	22.0483	21.4555	NaN	NaN	NaN	NaN	NaN	NaN	NaN	NaN	NaN	26S proteasome non-ATPase regulatory subunit 7	PSMD7
25.565	26.9432	26.0508	26.5588	26.358	26.995	27.3916	27.4379	27.2839	25.6836	25.5273	24.7755	22.7011	25.9192	25.6431	24.4944	25.3091	25.5932	0.364692	0.56958	-0.40455	Prostaglandin F2 receptor negative regulator	PTGFRN
NaN	NaN	NaN	22.3499	NaN	21.7373	22.6964	21.7489	NaN	22.8918	22.5047	22.8847	NaN	NaN	NaN	NaN	NaN	NaN	NaN	NaN	NaN	Inactive tyrosine-protein kinase 7	PTK7
NaN	NaN	NaN	NaN	NaN	NaN	NaN	NaN	NaN	NaN	NaN	NaN	NaN	NaN	NaN	NaN	30.3434	NaN	NaN	NaN	NaN	Protein-tyrosine-phosphatase;Receptor-type tyrosine-protein phosphatase C	PTPRC
NaN	NaN	NaN	NaN	NaN	NaN	21.9273	NaN	NaN	NaN	21.4448	NaN	NaN	NaN	NaN	NaN	NaN	NaN	NaN	NaN	NaN	Receptor-type tyrosine-protein phosphatase S;Protein-tyrosine-phosphatase	PTPRS
NaN	NaN	22.5216	22.4183	NaN	NaN	21.7615	20.9948	21.086	22.0922	21.6864	22.6061	NaN	NaN	NaN	NaN	NaN	NaN	NaN	NaN	NaN	Pituitary tumor-transforming gene 1 protein-interacting protein	PTTG1IP
19.2298	25.0641	23.7699	23.5083	24.6499	24.3193	26.3159	24.7055	24.6611	23.1056	22.6678	22.0849	25.5246	24.6865	20.842	31.2639	30.5348	31.3187	0.649638	0.350374	2.07267	Pentraxin-related protein PTX3	PTX3
NaN	NaN	24.569	23.8317	NaN	24.7998	24.9942	24.2544	24.4618	NaN	24.8862	NaN	NaN	NaN	NaN	NaN	NaN	NaN	NaN	NaN	NaN		PXDN
30.7979	30.9459	31.2629	30.4502	30.8103	31.0052	31.3915	30.7934	30.8709	30.6689	30.8255	30.6538	30.5319	30.7002	31.0638	30.2275	29.8342	30.8144	2.17575	0.197765	-0.340963	Peroxidasin homolog	PXDN
NaN	19.9411	NaN	20.5083	NaN	20.3803	22.7745	NaN	NaN	20.2855	19.6896	19.7975	NaN	NaN	NaN	NaN	NaN	NaN	NaN	NaN	NaN	Glycogen phosphorylase, brain form	PYGB
NaN	21.5706	NaN	22.2698	21.3561	21.772	23.8914	NaN	21.1216	21.7244	21.6122	20.9426	NaN	NaN	NaN	NaN	NaN	NaN	NaN	NaN	NaN	Glycogen phosphorylase, liver form;Alpha-1,4 glucan phosphorylase	PYGL
NaN	NaN	NaN	NaN	NaN	NaN	NaN	NaN	NaN	NaN	NaN	NaN	NaN	NaN	NaN	NaN	NaN	22.7677	NaN	NaN	NaN	Glycogen phosphorylase, muscle form	PYGM
28.4625	28.8468	28.0044	26.4408	26.7929	27.3818	28.3501	29.5425	29.5397	28.4837	28.6406	28.1715	30.2804	29.6005	29.6272	27.4455	27.1802	26.991	2.90362	0.00222222	-1.63623	Sulfhydryl oxidase 1	QSOX1
NaN	NaN	NaN	NaN	NaN	NaN	NaN	NaN	NaN	NaN	NaN	21.0179	NaN	NaN	NaN	NaN	NaN	NaN	NaN	NaN	NaN	Ras-related protein Rab-10	RAB10
NaN	NaN	NaN	NaN	NaN	NaN	NaN	NaN	NaN	NaN	NaN	21.4903	NaN	NaN	NaN	NaN	NaN	NaN	NaN	NaN	NaN	Ras-related protein Rab-1A	RAB1A
NaN	21.6949	22.1459	21.5797	NaN	NaN	21.5962	21.683	NaN	22.1591	21.7782	22.2215	NaN	NaN	NaN	NaN	NaN	NaN	NaN	NaN	NaN	Ras-related protein Rab-5C;Ras-related protein Rab-5B;Ras-related protein Rab-5A	RAB5C;RAB5B;RAB5A
23.8939	23.702	25.1687	24.9555	23.2898	24.1373	23.7903	23.4021	23.4785	24.3077	24.0783	24.5429	NaN	23.1988	NaN	NaN	NaN	NaN	0.334504	0.591847	-0.424023	Ras-related protein Rab-7a	RAB7A
NaN	NaN	22.4746	22.4259	NaN	22.1846	NaN	21.7286	21.4125	21.9558	22.2368	NaN	NaN	NaN	NaN	NaN	NaN	NaN	NaN	NaN	NaN	Ras-related C3 botulinum toxin substrate 2;Ras-related C3 botulinum toxin substrate 1;Ras-related C3 botulinum toxin substrate 3;Rho-related GTP-binding protein RhoQ;Rho-related GTP-binding protein RhoJ;Cell division control protein 42 homolog;Rho-related GTP-binding protein RhoG	RAC2;RAC1;RAC3;CDC42;RHOJ;RHOQ;RHOG
NaN	NaN	NaN	22.6826	NaN	NaN	23.1896	NaN	NaN	NaN	22.0952	NaN	NaN	NaN	NaN	NaN	NaN	NaN	NaN	NaN	NaN	GTP-binding nuclear protein Ran	RAN
NaN	NaN	NaN	NaN	NaN	NaN	21.1645	NaN	NaN	NaN	NaN	NaN	NaN	NaN	NaN	NaN	NaN	NaN	NaN	NaN	NaN	Ran-binding protein 9	RANBP9
23.5932	23.4294	24.3409	24.7855	23.9838	24.1764	24.5161	23.7002	23.4521	24.1169	24.2794	24.1798	NaN	23.1858	NaN	NaN	NaN	23.227	0.671847	0.406857	0.451451	Ras-related protein Rap-1b;Ras-related protein Rap-1A;Ras-related protein Rap-1b-like protein	RAP1B;RAP1A
NaN	NaN	NaN	19.5476	NaN	NaN	24.7477	NaN	NaN	18.9758	NaN	NaN	NaN	NaN	NaN	NaN	NaN	NaN	NaN	NaN	NaN	Arginine--tRNA ligase, cytoplasmic	RARS
NaN	NaN	NaN	NaN	NaN	NaN	NaN	NaN	NaN	NaN	NaN	NaN	NaN	NaN	NaN	NaN	NaN	22.6024	NaN	NaN	NaN	Retinoblastoma-like protein 2	RBL2
NaN	NaN	NaN	NaN	NaN	NaN	NaN	NaN	NaN	NaN	20.0966	NaN	NaN	NaN	NaN	NaN	NaN	NaN	NaN	NaN	NaN	Reversion-inducing cysteine-rich protein with Kazal motifs	RECK
NaN	22.2809	NaN	NaN	NaN	NaN	22.5981	NaN	NaN	22.6008	22.7315	NaN	NaN	NaN	NaN	NaN	NaN	NaN	NaN	NaN	NaN	Raftlin	RFTN1
NaN	NaN	NaN	NaN	NaN	NaN	NaN	NaN	NaN	NaN	NaN	NaN	NaN	NaN	NaN	NaN	NaN	24.5076	NaN	NaN	NaN	Rho-related BTB domain-containing protein 3	RHOBTB3
NaN	22.0806	23.0205	22.8042	NaN	NaN	21.9714	NaN	NaN	NaN	22.2576	NaN	NaN	NaN	NaN	NaN	NaN	NaN	NaN	NaN	NaN	E3 ubiquitin-protein ligase RNF13	RNF13
NaN	NaN	NaN	22.1809	NaN	NaN	23.7189	NaN	NaN	NaN	NaN	NaN	NaN	NaN	NaN	NaN	NaN	NaN	NaN	NaN	NaN	E3 ubiquitin-protein ligase RNF213	RNF213
NaN	20.4699	NaN	NaN	NaN	NaN	NaN	NaN	NaN	22.127	NaN	NaN	NaN	NaN	NaN	NaN	NaN	NaN	NaN	NaN	NaN	Ribonuclease inhibitor	RNH1
NaN	NaN	NaN	NaN	NaN	NaN	20.0926	NaN	NaN	NaN	NaN	NaN	NaN	NaN	NaN	NaN	NaN	NaN	NaN	NaN	NaN	60S ribosomal protein L23	RPL23
NaN	NaN	NaN	21.7089	NaN	21.4856	23.5667	NaN	NaN	21.657	21.3735	21.4412	NaN	NaN	NaN	NaN	NaN	NaN	NaN	NaN	NaN	60S ribosomal protein L5	RPL5
NaN	21.5483	NaN	NaN	22.4985	22.0687	22.9596	22.3641	NaN	22.729	21.4665	22.5435	NaN	NaN	NaN	NaN	NaN	NaN	NaN	NaN	NaN	60S acidic ribosomal protein P0;60S acidic ribosomal protein P0-like	RPLP0;RPLP0P6
NaN	NaN	NaN	20.8956	NaN	NaN	22.3539	NaN	NaN	NaN	NaN	NaN	NaN	NaN	NaN	NaN	NaN	NaN	NaN	NaN	NaN	40S ribosomal protein S2	RPS2
NaN	21.2012	NaN	22.0387	NaN	NaN	24.3318	NaN	NaN	21.5775	NaN	NaN	NaN	NaN	NaN	NaN	NaN	NaN	NaN	NaN	NaN	40S ribosomal protein S3	RPS3
NaN	22.1361	22.6799	22.1285	NaN	NaN	22.6678	NaN	NaN	22.0199	NaN	NaN	NaN	NaN	NaN	NaN	NaN	NaN	NaN	NaN	NaN	40S ribosomal protein S3a	RPS3A
NaN	NaN	NaN	22.2391	NaN	NaN	23.1731	NaN	NaN	NaN	NaN	NaN	NaN	NaN	NaN	NaN	NaN	NaN	NaN	NaN	NaN	40S ribosomal protein S4, X isoform	RPS4X
NaN	NaN	NaN	22.7637	NaN	NaN	24.5993	NaN	NaN	22.4712	NaN	NaN	NaN	NaN	NaN	NaN	NaN	22.831	NaN	NaN	NaN	40S ribosomal protein SA	RPSA
NaN	NaN	NaN	24.765	NaN	24.2325	25.1597	24.0388	NaN	24.7586	23.9208	NaN	NaN	NaN	NaN	NaN	NaN	NaN	NaN	NaN	NaN	Reticulon;Reticulon-4	RTN4
NaN	22.6626	NaN	23.1029	NaN	22.5255	24.5929	NaN	NaN	NaN	NaN	NaN	NaN	NaN	NaN	NaN	NaN	NaN	NaN	NaN	NaN	RuvB-like 1	RUVBL1
NaN	NaN	NaN	NaN	NaN	NaN	24.3544	NaN	NaN	NaN	NaN	NaN	NaN	NaN	NaN	NaN	NaN	NaN	NaN	NaN	NaN	RuvB-like 2	RUVBL2
NaN	NaN	NaN	NaN	NaN	NaN	NaN	NaN	NaN	NaN	NaN	NaN	NaN	NaN	NaN	NaN	NaN	18.2924	NaN	NaN	NaN	Protein S100-A11;Protein S100-A11, N-terminally processed	S100A11
NaN	23.2666	NaN	NaN	NaN	NaN	NaN	NaN	NaN	NaN	NaN	NaN	NaN	NaN	NaN	NaN	NaN	NaN	NaN	NaN	NaN	Protein S100-A3	S100A3
NaN	NaN	NaN	NaN	NaN	NaN	NaN	NaN	NaN	NaN	NaN	NaN	NaN	NaN	NaN	NaN	NaN	NaN	NaN	NaN	NaN	Protein S100-A8;Protein S100-A8, N-terminally processed	S100A8
NaN	20.9006	20.4532	NaN	NaN	NaN	NaN	25.288	23.3584	21.2812	20.2617	21.5891	24.3655	21.387	21.4535	21.8911	21.9135	21.6553	0.256093	0.64437	-0.465381	Suprabasin	SBSN
NaN	NaN	NaN	22.5362	NaN	NaN	22.3518	NaN	NaN	NaN	NaN	22.4159	NaN	NaN	NaN	NaN	NaN	NaN	NaN	NaN	NaN	Secretory carrier-associated membrane protein 3	SCAMP3
25.1665	25.2294	26.9235	26.0906	24.0459	24.886	25.3483	24.5214	25.1898	24.9687	25.5436	26.0206	NaN	25.1753	24.2223	NaN	NaN	NaN	0.760395	0.340481	-1.16483	Lysosome membrane protein 2	SCARB2
24.2188	24.0277	23.8875	23.7689	NaN	23.7756	23.6003	NaN	23.2687	NaN	NaN	NaN	NaN	NaN	24.6079	NaN	NaN	NaN	NaN	NaN	NaN	Signal peptide, CUB and EGF-like domain-containing protein 1	SCUBE1
28.1589	28.6491	29.2628	29.0586	28.3313	28.8203	28.91	28.6875	28.4523	28.9223	29.0549	28.8336	25.4386	27.5125	27.4721	22.9474	24.1497	25.2052	0.824869	0.338766	-0.802311	Syntenin-1	SDCBP
NaN	NaN	24.9177	25.1035	NaN	24.3104	24.4842	24.4865	24.2766	24.8651	24.6866	NaN	NaN	NaN	NaN	NaN	NaN	NaN	NaN	NaN	NaN	Syntenin-1	SDCBP
NaN	22.3399	NaN	22.1177	21.6857	21.9167	21.7951	21.9394	NaN	21.8854	21.9389	21.8731	NaN	NaN	NaN	NaN	NaN	NaN	NaN	NaN	NaN	Protein transport protein Sec23A	SEC23A
NaN	NaN	NaN	NaN	NaN	21.1035	23.9807	NaN	20.5941	21.3952	NaN	NaN	NaN	NaN	NaN	NaN	NaN	NaN	NaN	NaN	NaN	Protein transport protein Sec31A	SEC31A
NaN	25.1702	23.5039	23.5283	23.1679	24.1107	23.6098	25.5301	25.8319	24.7142	25.2266	25.1125	NaN	NaN	23.8678	NaN	NaN	NaN	NaN	NaN	NaN	Semaphorin-3B	SEMA3B
NaN	NaN	NaN	NaN	NaN	NaN	NaN	NaN	21.7965	22.6126	23.0996	23.0111	NaN	NaN	NaN	NaN	NaN	NaN	NaN	NaN	NaN	Semaphorin-5A	SEMA5A
NaN	NaN	NaN	21.889	NaN	NaN	23.625	NaN	NaN	NaN	21.5248	NaN	NaN	NaN	NaN	NaN	NaN	NaN	NaN	NaN	NaN	Septin-2	SEPT2
NaN	NaN	NaN	NaN	NaN	NaN	NaN	NaN	NaN	NaN	NaN	NaN	NaN	21.1816	NaN	NaN	NaN	NaN	NaN	NaN	NaN	Septin-7	SEPT7
NaN	NaN	NaN	NaN	NaN	NaN	20.946	NaN	NaN	NaN	NaN	NaN	NaN	NaN	NaN	NaN	NaN	NaN	NaN	NaN	NaN	Septin-9	SEPT9
NaN	NaN	24.185	25.071	NaN	23.518	24.1681	23.2493	23.5342	23.8526	23.874	24.9598	NaN	NaN	NaN	NaN	NaN	NaN	NaN	NaN	NaN	Serine incorporator 1	SERINC1
NaN	NaN	NaN	NaN	NaN	NaN	NaN	NaN	NaN	NaN	NaN	21.1159	NaN	NaN	NaN	NaN	NaN	NaN	NaN	NaN	NaN	Serine incorporator 2	SERINC2
NaN	NaN	NaN	NaN	NaN	NaN	NaN	25.959	21.1982	NaN	19.5977	NaN	NaN	NaN	NaN	NaN	NaN	NaN	NaN	NaN	NaN	Serpin B12	SERPINB12
NaN	NaN	NaN	NaN	NaN	NaN	NaN	23.9562	NaN	NaN	NaN	NaN	NaN	NaN	NaN	NaN	NaN	NaN	NaN	NaN	NaN	Serpin B3;Serpin B4	SERPINB3;SERPINB4
NaN	NaN	NaN	NaN	NaN	NaN	NaN	NaN	NaN	NaN	NaN	NaN	NaN	NaN	NaN	NaN	NaN	21.14	NaN	NaN	NaN	Antithrombin-III	SERPINC1
24.3527	25.6742	26.176	25.4448	25.0824	24.7903	26.7208	25.4835	25.2653	24.6594	25.3335	24.9684	NaN	24.4174	24.5592	28.7145	28.6451	27.9896	0.612356	0.371007	1.4089	Plasminogen activator inhibitor 1	SERPINE1
24.0978	27.0811	25.1936	25.6176	25.0131	26.5636	27.5909	25.7974	24.8266	22.0276	23.7601	21.5687	25.5834	25.6329	25.6701	25.86	25.0732	27.0053	0.596133	0.383784	-0.998256	Glia-derived nexin	SERPINE2
25.1068	25.6213	24.8929	NaN	24.1018	23.8927	24.4187	25.5765	25.5817	24.9038	24.5141	23.9382	27.3202	25.5485	26.1896	26.741	26.2481	26.0432	1.20477	0.197797	-0.923523	Pigment epithelium-derived factor	SERPINF1
24.5581	25.3462	23.9232	23.324	NaN	NaN	25.683	25.8932	25.52	25.7081	25.5322	25.4161	25.3415	25.1711	25.4862	NaN	23.8233	NaN	1.84826	0.0309091	-2.42152	Plasma protease C1 inhibitor	SERPING1
NaN	NaN	NaN	NaN	NaN	NaN	23.761	NaN	22.6582	NaN	NaN	NaN	NaN	23.2174	NaN	23.2894	NaN	24.1831	NaN	NaN	NaN	Serpin H1	SERPINH1
NaN	NaN	NaN	NaN	NaN	NaN	21.3983	NaN	NaN	NaN	NaN	NaN	NaN	NaN	NaN	NaN	NaN	NaN	NaN	NaN	NaN	Splicing factor 3B subunit 1	SF3B1
NaN	NaN	NaN	22.9187	NaN	NaN	22.7199	NaN	NaN	22.7952	22.6771	NaN	NaN	NaN	NaN	NaN	NaN	NaN	NaN	NaN	NaN	Splicing factor 3B subunit 3	SF3B3
NaN	25.8667	24.2828	NaN	NaN	NaN	26.6824	27.2358	26.4676	NaN	23.9739	24.0813	NaN	NaN	25.0889	NaN	NaN	NaN	NaN	NaN	NaN	Secreted frizzled-related protein 1	SFRP1
NaN	NaN	NaN	22.261	NaN	NaN	NaN	NaN	NaN	NaN	NaN	NaN	NaN	NaN	NaN	NaN	NaN	NaN	NaN	NaN	NaN	N-sulphoglucosamine sulphohydrolase	SGSH
NaN	NaN	NaN	NaN	NaN	NaN	22.3548	NaN	NaN	NaN	NaN	NaN	NaN	NaN	NaN	NaN	NaN	NaN	NaN	NaN	NaN	Helicase SKI2W	SKIV2L
NaN	NaN	NaN	20.7071	NaN	NaN	20.6231	NaN	NaN	20.8928	20.5763	NaN	NaN	NaN	NaN	NaN	NaN	NaN	NaN	NaN	NaN	Solute carrier family 12 member 4	SLC12A4
NaN	NaN	NaN	NaN	NaN	NaN	NaN	NaN	NaN	NaN	19.8367	NaN	NaN	NaN	NaN	NaN	NaN	NaN	NaN	NaN	NaN	Monocarboxylate transporter 4	SLC16A3
NaN	NaN	NaN	22.5742	NaN	23.3079	23.7069	22.7965	23.1715	23.7408	23.377	23.3476	NaN	NaN	NaN	NaN	NaN	NaN	NaN	NaN	NaN	Neutral amino acid transporter B(0);Amino acid transporter	SLC1A5
NaN	NaN	NaN	24.9968	NaN	24.634	24.7306	NaN	NaN	24.9035	NaN	25.7759	NaN	NaN	NaN	NaN	NaN	NaN	NaN	NaN	NaN	Solute carrier family 2, facilitated glucose transporter member 1	SLC2A1
NaN	NaN	NaN	NaN	NaN	NaN	NaN	NaN	NaN	NaN	NaN	22.018	NaN	NaN	NaN	NaN	NaN	NaN	NaN	NaN	NaN	Solute carrier family 2, facilitated glucose transporter member 14;Solute carrier family 2, facilitated glucose transporter member 3	SLC2A14;SLC2A3
NaN	NaN	NaN	NaN	NaN	NaN	NaN	NaN	NaN	NaN	NaN	NaN	NaN	NaN	20.1519	NaN	NaN	NaN	NaN	NaN	NaN	Solute carrier family 35 member F6	SLC35F6
24.2785	23.7027	24.9384	24.6537	NaN	24.2267	25.0593	23.3099	24.1877	23.8138	24.9493	25.5518	NaN	NaN	23.7586	NaN	NaN	NaN	0.0221783	0.969025	-0.0447619	Sodium-coupled neutral amino acid transporter 2	SLC38A2
NaN	NaN	21.9014	NaN	NaN	NaN	21.8306	NaN	21.4322	NaN	NaN	21.7328	NaN	NaN	NaN	NaN	NaN	NaN	NaN	NaN	NaN	Zinc transporter ZIP14	SLC39A14
NaN	NaN	23.8007	23.4152	22.9226	23.4618	23.7362	22.8803	23.1901	22.9566	23.0769	23.6788	NaN	NaN	NaN	22.8575	NaN	23.2744	0.811738	0.354689	0.605284	4F2 cell-surface antigen heavy chain	SLC3A2
NaN	NaN	NaN	NaN	NaN	NaN	NaN	NaN	NaN	NaN	NaN	NaN	NaN	NaN	20.232	NaN	NaN	NaN	NaN	NaN	NaN	Choline transporter-like protein 1	SLC44A1
NaN	NaN	NaN	24.1092	NaN	23.7508	23.3922	22.5833	22.8889	23.417	23.337	23.6006	NaN	NaN	NaN	NaN	NaN	21.6045	NaN	NaN	NaN	Choline transporter-like protein 2	SLC44A2
NaN	NaN	NaN	NaN	NaN	NaN	NaN	NaN	NaN	NaN	NaN	20.7846	NaN	NaN	NaN	NaN	NaN	NaN	NaN	NaN	NaN	Anion exchange protein;Sodium bicarbonate cotransporter 3	SLC4A7
21.632	21.0039	21.4172	22.7872	22.1542	22.8166	21.9794	20.6417	21.27	22.6829	22.639	24.1367	NaN	NaN	20.7899	NaN	NaN	NaN	0.651118	0.38607	0.695087	Transporter;Sodium- and chloride-dependent taurine transporter	SLC6A6
29.9144	28.8903	29.1575	29.0716	29.3046	28.4414	28.62	29.0039	27.8847	NaN	NaN	NaN	NaN	29.5146	27.2323	NaN	27.5692	NaN	1.84349	0.02825	-3.98047	Serine/threonine-protein kinase SMG1	SMG1
NaN	NaN	NaN	NaN	NaN	NaN	21.5462	NaN	NaN	NaN	NaN	NaN	NaN	NaN	NaN	NaN	NaN	NaN	NaN	NaN	NaN	Staphylococcal nuclease domain-containing protein 1	SND1
NaN	25.0938	NaN	NaN	NaN	NaN	NaN	22.3572	22.7272	NaN	23.007	NaN	NaN	NaN	NaN	NaN	NaN	NaN	NaN	NaN	NaN	Sushi, nidogen and EGF-like domain-containing protein 1	SNED1
NaN	NaN	NaN	NaN	NaN	NaN	21.8468	NaN	NaN	NaN	20.7705	NaN	NaN	NaN	NaN	NaN	NaN	NaN	NaN	NaN	NaN	U5 small nuclear ribonucleoprotein 200 kDa helicase	SNRNP200
NaN	NaN	NaN	NaN	NaN	NaN	21.1461	NaN	NaN	NaN	NaN	21.8593	NaN	NaN	NaN	NaN	NaN	NaN	NaN	NaN	NaN	Sorting nexin-17	SNX17
NaN	NaN	NaN	NaN	NaN	NaN	NaN	NaN	20.047	NaN	NaN	NaN	NaN	NaN	NaN	NaN	NaN	NaN	NaN	NaN	NaN	Sorting nexin-18	SNX18
NaN	NaN	NaN	NaN	NaN	NaN	22.5648	NaN	NaN	NaN	NaN	NaN	NaN	NaN	NaN	NaN	NaN	NaN	NaN	NaN	NaN	Sorting nexin-9	SNX9
NaN	25.238	NaN	NaN	NaN	24.3587	24.6556	25.5991	25.1187	26.5171	26.2128	26.7414	NaN	NaN	NaN	NaN	NaN	NaN	NaN	NaN	NaN	Extracellular superoxide dismutase [Cu-Zn]	SOD3
NaN	NaN	NaN	NaN	NaN	NaN	23.0457	NaN	NaN	NaN	NaN	NaN	NaN	NaN	NaN	24.5275	25.1435	23.8834	NaN	NaN	NaN	SPARC	SPARC
NaN	22.8924	NaN	NaN	NaN	NaN	NaN	NaN	NaN	NaN	22.2341	NaN	NaN	NaN	NaN	NaN	NaN	NaN	NaN	NaN	NaN	Spondin-1	SPON1
NaN	NaN	NaN	21.8447	NaN	NaN	NaN	NaN	NaN	NaN	NaN	NaN	NaN	NaN	NaN	NaN	NaN	NaN	NaN	NaN	NaN	Spondin-2	SPON2
NaN	NaN	23.2212	22.8727	NaN	NaN	22.2742	22.6266	22.6112	22.8882	22.8697	NaN	NaN	NaN	NaN	NaN	NaN	NaN	NaN	NaN	NaN	Signal peptide peptidase-like 2A	SPPL2A
NaN	22.5585	21.6906	22.7592	22.3191	22.1017	22.5584	22.2304	NaN	22.4947	22.1469	22.4341	NaN	NaN	NaN	22.7977	NaN	23.1028	1.5376	0.1046	1.23518	Spectrin alpha chain, non-erythrocytic 1	SPTAN1
NaN	NaN	NaN	NaN	NaN	NaN	NaN	NaN	NaN	NaN	NaN	NaN	NaN	NaN	NaN	NaN	NaN	23.6651	NaN	NaN	NaN	Spectrin beta chain, non-erythrocytic 1	SPTBN1
NaN	21.1144	22.1728	22.9346	NaN	22.6066	22.5839	NaN	NaN	21.8807	NaN	21.5922	NaN	NaN	21.1117	NaN	NaN	NaN	NaN	NaN	NaN	Sequestosome-1	SQSTM1
23.8206	25.1586	24.8641	24.2991	24.2405	24.2718	24.578	25.6659	24.964	25.2132	24.0785	24.775	NaN	NaN	25.2954	23.6752	23.5565	23.2302	0.155903	0.759055	0.257277	Sushi repeat-containing protein SRPX	SRPX
NaN	22.6072	NaN	NaN	NaN	NaN	21.2709	21.5974	21.8276	NaN	NaN	NaN	NaN	NaN	NaN	NaN	NaN	NaN	NaN	NaN	NaN	Sushi repeat-containing protein SRPX2	SRPX2
NaN	NaN	NaN	23.2562	NaN	NaN	24.2457	NaN	NaN	NaN	NaN	NaN	NaN	NaN	NaN	NaN	NaN	NaN	NaN	NaN	NaN	Signal transducer and activator of transcription;Signal transducer and activator of transcription 1-alpha/beta	STAT1
NaN	NaN	NaN	NaN	NaN	NaN	21.8362	NaN	NaN	NaN	NaN	NaN	NaN	NaN	NaN	NaN	NaN	NaN	NaN	NaN	NaN	Signal transducer and activator of transcription 3;Signal transducer and activator of transcription	STAT3
NaN	NaN	NaN	NaN	NaN	NaN	NaN	21.4925	NaN	NaN	21.315	NaN	NaN	NaN	NaN	NaN	NaN	NaN	NaN	NaN	NaN	Stanniocalcin-1	STC1
22.6917	22.2984	21.5835	21.6832	21.8501	22.4286	22.6579	23.1159	22.6461	21.2166	21.506	NaN	22.7129	22.993	22.9986	22.4505	NaN	22.6748	1.5861	0.125154	-0.778102	Stanniocalcin-2	STC2
28.7309	29.1012	29.7391	29.7925	27.6613	28.5677	30.0297	29.4709	29.5315	29.9739	29.8688	30.4236	26.9337	28.2353	28.1789	NaN	NaN	NaN	1.06321	0.175818	-2.50566	Erythrocyte band 7 integral membrane protein	STOM
NaN	23.4471	NaN	NaN	NaN	NaN	23.0998	22.2722	22.6874	22.707	23.6798	23.02	NaN	NaN	NaN	NaN	NaN	NaN	NaN	NaN	NaN	Extracellular sulfatase Sulf-2	SULF2
NaN	19.97	NaN	20.5385	NaN	NaN	22.4745	NaN	NaN	20.2518	NaN	NaN	NaN	NaN	NaN	NaN	NaN	NaN	NaN	NaN	NaN	Surfeit locus protein 4	SURF4
30.2985	31.2934	30.1278	28.2861	28.346	29.0514	29.7014	31.5164	31.2226	30.1739	29.7133	29.749	31.1631	30.5576	31.59	21.3143	23.3246	23.2065	1.83824	0.0273333	-3.81176	Sushi, von Willebrand factor type A, EGF and pentraxin domain-containing protein 1	SVEP1
NaN	NaN	NaN	NaN	NaN	NaN	NaN	NaN	NaN	NaN	NaN	NaN	NaN	NaN	20.5893	NaN	NaN	NaN	NaN	NaN	NaN	Synaptophysin-like protein 1	SYPL1
NaN	NaN	NaN	21.8095	NaN	NaN	21.4072	NaN	NaN	NaN	NaN	21.2068	NaN	NaN	NaN	NaN	NaN	NaN	NaN	NaN	NaN	Threonine--tRNA ligase, cytoplasmic	TARS
NaN	23.0468	24.6574	24.541	22.6767	23.6913	23.5505	22.7902	23.5613	23.9494	23.5411	23.7354	NaN	NaN	NaN	NaN	NaN	NaN	NaN	NaN	NaN	V-type proton ATPase 116 kDa subunit a isoform 3;V-type proton ATPase subunit a	TCIRG1
NaN	22.1301	22.0261	24.6664	22.2779	22.147	27.0744	20.3981	NaN	22.8648	21.8519	NaN	NaN	NaN	NaN	NaN	NaN	NaN	NaN	NaN	NaN	T-complex protein 1 subunit alpha	TCP1
23.3061	22.5907	23.9274	NaN	NaN	NaN	23.5072	23.6738	23.8113	22.1316	22.4361	23.1138	NaN	23.6741	24.4852	NaN	NaN	NaN	2.07425	0.0258947	-1.64577	Tissue factor pathway inhibitor 2	TFPI2
25.3721	25.1782	25.9865	25.9054	25.5454	25.181	25.7602	25.0759	25.4526	25.3736	25.9367	25.784	NaN	23.8009	25.0985	NaN	NaN	NaN	0.767301	0.337133	-0.975505	Transferrin receptor protein 1;Transferrin receptor protein 1, serum form	TFRC
NaN	NaN	NaN	NaN	NaN	NaN	NaN	NaN	NaN	NaN	NaN	NaN	NaN	NaN	NaN	NaN	19.3965	NaN	NaN	NaN	NaN	Transforming growth factor beta-1;Latency-associated peptide	TGFB1
31.1225	31.3048	31.7757	30.0584	29.6121	30.9005	32.2528	30.7892	31.0366	30.8927	31.2775	30.9523	30.928	31.1873	31.4362	31.6561	31.2417	31.682	0.679081	0.421846	-0.395528	Transforming growth factor-beta-induced protein ig-h3	TGFBI
NaN	NaN	NaN	NaN	NaN	NaN	NaN	NaN	NaN	NaN	NaN	NaN	NaN	NaN	NaN	NaN	NaN	NaN	NaN	NaN	NaN	TGF-beta receptor type-2	TGFBR2
NaN	NaN	NaN	NaN	NaN	NaN	NaN	25.5528	NaN	NaN	NaN	NaN	NaN	NaN	NaN	NaN	NaN	NaN	NaN	NaN	NaN	Protein-glutamine gamma-glutamyltransferase K	TGM1
22.2446	25.1763	24.4753	25.4522	23.4149	24.7654	24.9087	24.5447	24.3852	27.3593	27.4588	27.9517	NaN	NaN	24.1157	25.4484	NaN	25.0337	1.4727	0.104432	1.68138	Protein-glutamine gamma-glutamyltransferase 2	TGM2
NaN	NaN	NaN	NaN	NaN	NaN	NaN	26.0684	20.7015	NaN	NaN	NaN	NaN	NaN	NaN	NaN	NaN	NaN	NaN	NaN	NaN	Protein-glutamine gamma-glutamyltransferase E;Protein-glutamine gamma-glutamyltransferase E 50 kDa catalytic chain;Protein-glutamine gamma-glutamyltransferase E 27 kDa non-catalytic chain	TGM3
27.3411	30.4167	29.1063	31.3955	30.812	31.2652	29.0211	31.0995	31.3333	31.1292	30.4339	32.1969	27.5858	27.9317	29.0612	30.5902	30.3436	31.9619	2.35634	0.00966667	1.91463	Thrombospondin-1	THBS1
25.3126	28.6919	24.5204	27.1213	26.4989	27.0734	26.1031	29.4028	29.8046	24.4167	24.6168	25.7922	22.8559	21.122	26.4551	28.6738	28.5712	30.1115	0.277814	0.60282	0.956362	Thrombospondin-2	THBS2
22.9016	26.3419	26.0496	24.8621	25.4484	25.6364	27.0179	27.107	26.3653	26.7909	26.8425	26.8138	23.3218	23.7291	26.8062	24.6122	24.9975	26.4312	0.432249	0.543045	0.310523	Thrombospondin-3	THBS3
24.6735	25.6782	25.5147	25.3545	25.001	25.6843	26.9037	26.5201	26.5091	27.3441	26.7882	26.6698	25.2961	25.6156	25.0717	NaN	NaN	NaN	0.712247	0.355009	-1.10931	Thy-1 membrane glycoprotein	THY1
25.6682	27.4266	27.4635	24.3399	24.3022	25.3718	26.8847	26.9576	27.1717	26.3728	25.8349	25.9203	26.6513	26.2229	27.1009	26.7511	26.7567	26.0103	1.77216	0.080875	-1.0986	Metalloproteinase inhibitor 1	TIMP1
26.9436	27.4718	27.0478	27.2398	26.8802	27.9383	26.4771	27.9482	27.9119	28.1512	28.1269	28.4409	26.6389	25.2248	27.4308	26.5122	26.7025	26.1105	0.489319	0.510758	0.334165	Metalloproteinase inhibitor 2	TIMP2
25.5893	25.2048	25.0445	26.896	27.2031	26.0454	25.4906	24.4566	24.9724	26.5779	25.6379	25.5687	25.5478	25.5217	24.9362	23.8209	23.0442	22.6677	0.0476394	0.949793	0.0775725	Transketolase	TKT
24.2017	24.5912	24.9146	26.0258	25.4268	26.3339	27.5268	24.7857	24.1077	25.2209	25.3985	25.2074	NaN	23.4945	NaN	25.4337	NaN	25.6933	0.929947	0.254089	1.21233	Talin-1	TLN1
NaN	NaN	NaN	NaN	NaN	NaN	NaN	NaN	NaN	22.8989	NaN	NaN	NaN	NaN	NaN	NaN	NaN	NaN	NaN	NaN	NaN	Protein lifeguard 3	TMBIM1
NaN	NaN	NaN	NaN	NaN	NaN	20.9995	NaN	NaN	NaN	NaN	NaN	NaN	NaN	NaN	NaN	NaN	NaN	NaN	NaN	NaN	Transmembrane emp24 domain-containing protein 7	TMED7-TICAM2;TMED7
NaN	NaN	NaN	NaN	NaN	NaN	NaN	NaN	NaN	NaN	NaN	21.3678	NaN	NaN	NaN	NaN	NaN	NaN	NaN	NaN	NaN	Transmembrane protein 106B	TMEM106B
NaN	23.8511	24.5773	24.4673	NaN	24.3536	NaN	NaN	23.2787	23.6526	24.3211	24.8238	NaN	NaN	NaN	NaN	NaN	NaN	NaN	NaN	NaN	Transmembrane protein 119	TMEM119
NaN	NaN	NaN	NaN	NaN	NaN	NaN	19.5546	NaN	NaN	NaN	NaN	NaN	NaN	NaN	NaN	NaN	NaN	NaN	NaN	NaN	Transmembrane protein 132A	TMEM132A
24.6382	25.4175	26.3143	26.5007	24.0987	25.0844	24.7553	24.0947	24.2554	24.6897	24.7396	25.3343	NaN	NaN	23.8475	NaN	NaN	NaN	0.0492484	0.948461	-0.0833005	Transmembrane protein 176A	TMEM176A
25.5208	26.098	27.2713	26.8092	25.0436	25.6908	25.8089	24.8158	25.7418	25.9995	26.021	26.6544	NaN	NaN	NaN	NaN	NaN	NaN	NaN	NaN	NaN	Transmembrane protein 176B	TMEM176B
NaN	NaN	NaN	NaN	NaN	NaN	NaN	19.4876	NaN	NaN	NaN	NaN	NaN	NaN	NaN	NaN	NaN	NaN	NaN	NaN	NaN	Tenascin	TNC
21.6118	28.5987	28.6429	NaN	NaN	NaN	25.4877	26.7027	25.9231	23.5008	23.7672	24.1462	24.847	21.7019	24.8768	21.1904	NaN	21.2886	2.61846	0.001	-3.35963	Tenascin	TNC
NaN	23.3162	NaN	NaN	NaN	NaN	22.6423	22.7039	23.4822	NaN	NaN	NaN	NaN	NaN	NaN	NaN	NaN	NaN	NaN	NaN	NaN	Tumor necrosis factor-inducible gene 6 protein	TNFAIP6
23.4372	23.3262	25.1179	23.3422	23.4692	23.5129	24.7672	23.856	24.5979	23.3926	24.1792	22.9859	25.7368	26.2515	25.1399	NaN	NaN	21.4645	1.7442	0.05712	-1.83763	Tumor necrosis factor receptor superfamily member 11B	TNFRSF11B
NaN	NaN	NaN	NaN	NaN	NaN	NaN	NaN	NaN	NaN	NaN	21.0257	NaN	NaN	NaN	NaN	NaN	NaN	NaN	NaN	NaN	Tumor necrosis factor receptor superfamily member 1A;Tumor necrosis factor receptor superfamily member 1A, membrane form;Tumor necrosis factor-binding protein 1	TNFRSF1A
NaN	NaN	NaN	21.377	NaN	NaN	21.7476	NaN	NaN	NaN	NaN	NaN	NaN	NaN	NaN	NaN	NaN	NaN	NaN	NaN	NaN	Transportin-1	TNPO1
NaN	NaN	NaN	NaN	NaN	NaN	20.6352	NaN	NaN	NaN	NaN	NaN	NaN	NaN	NaN	NaN	NaN	NaN	NaN	NaN	NaN	Tensin-3;Tensin-2;Tensin-1	TNS3;TNS1;TNS2
NaN	NaN	NaN	NaN	NaN	NaN	NaN	22.8292	NaN	NaN	NaN	NaN	NaN	NaN	NaN	NaN	NaN	NaN	NaN	NaN	NaN		TNXB
25.182	29.592	27.3614	27.5478	25.1831	27.3223	29.366	29.908	29.4148	24.7635	24.8064	21.8127	22.5399	22.1434	27.2074	NaN	NaN	23.3687	1.585	0.0662222	-2.82404	Tenascin-X	TNXB
NaN	NaN	NaN	22.0327	NaN	NaN	21.2259	NaN	NaN	NaN	NaN	NaN	NaN	NaN	NaN	NaN	NaN	NaN	NaN	NaN	NaN	Toll-interacting protein	TOLLIP
NaN	NaN	22.504	NaN	NaN	NaN	21.7509	NaN	21.4527	NaN	NaN	NaN	NaN	NaN	NaN	NaN	NaN	NaN	NaN	NaN	NaN	Trophoblast glycoprotein	TPBG
NaN	NaN	NaN	NaN	NaN	NaN	NaN	NaN	NaN	NaN	NaN	NaN	NaN	NaN	NaN	NaN	NaN	19.916	NaN	NaN	NaN	Triosephosphate isomerase	TPI1
NaN	NaN	21.9966	NaN	NaN	21.8255	21.9006	22.4068	22.0575	22.4937	22.7903	NaN	NaN	NaN	NaN	NaN	NaN	NaN	NaN	NaN	NaN	Tripeptidyl-peptidase 1	TPP1
NaN	21.633	22.0688	23.2733	NaN	22.1654	22.2008	22.0028	NaN	22.5813	21.6697	21.9332	NaN	NaN	NaN	NaN	NaN	NaN	NaN	NaN	NaN	Tripeptidyl-peptidase 2	TPP2
NaN	NaN	NaN	21.8379	NaN	NaN	22.0277	NaN	NaN	NaN	NaN	NaN	NaN	NaN	NaN	NaN	NaN	NaN	NaN	NaN	NaN	Transformer-2 protein homolog beta	TRA2B
NaN	NaN	NaN	NaN	NaN	NaN	20.8835	NaN	NaN	NaN	NaN	NaN	NaN	NaN	NaN	NaN	NaN	NaN	NaN	NaN	NaN	Transcription intermediary factor 1-beta	TRIM28
NaN	NaN	NaN	NaN	NaN	NaN	NaN	NaN	NaN	NaN	NaN	NaN	NaN	NaN	NaN	NaN	NaN	27.4134	NaN	NaN	NaN	Tripartite motif-containing protein 5	TRIM5
25.2756	24.7453	26.7291	26.4289	25.2988	25.9736	25.9726	24.1132	25.3263	27.1601	26.0058	26.8062	NaN	NaN	NaN	NaN	NaN	NaN	NaN	NaN	NaN	Transient receptor potential cation channel subfamily A member 1	TRPA1
NaN	NaN	NaN	NaN	NaN	NaN	NaN	NaN	NaN	NaN	NaN	20.8777	NaN	NaN	NaN	NaN	NaN	NaN	NaN	NaN	NaN	Tumor susceptibility gene 101 protein	TSG101
NaN	NaN	NaN	NaN	NaN	NaN	NaN	NaN	NaN	20.096	NaN	NaN	NaN	NaN	NaN	NaN	NaN	NaN	NaN	NaN	NaN	Translin	TSN
NaN	NaN	NaN	NaN	NaN	NaN	NaN	NaN	NaN	21.5806	NaN	NaN	NaN	NaN	NaN	NaN	NaN	NaN	NaN	NaN	NaN	Tetraspanin;Tetraspanin-14	TSPAN14
NaN	NaN	NaN	NaN	NaN	NaN	NaN	NaN	NaN	NaN	NaN	22.0046	NaN	NaN	NaN	NaN	NaN	NaN	NaN	NaN	NaN	Tetraspanin-3	TSPAN3
NaN	23.9654	23.465	23.4559	24.8699	25.3049	24.9045	24.8919	25.0993	25.7226	25.3707	24.2909	NaN	NaN	NaN	NaN	NaN	NaN	NaN	NaN	NaN	Tetraspanin;Tetraspanin-4	TSPAN4
NaN	22.3857	NaN	22.4851	NaN	NaN	22.6192	22.4132	22.0779	NaN	22.512	NaN	NaN	NaN	NaN	NaN	NaN	NaN	NaN	NaN	NaN	Tetraspanin-6	TSPAN6
NaN	NaN	NaN	NaN	NaN	NaN	20.2747	NaN	NaN	NaN	NaN	NaN	NaN	NaN	NaN	NaN	NaN	NaN	NaN	NaN	NaN	Tetratricopeptide repeat protein 37	TTC37
22.9015	23.8513	24.5521	24.5941	22.9387	24.299	24.2303	22.9996	23.7109	23.3679	23.3664	23.4939	21.7012	22.7674	22.335	20.8892	NaN	21.1801	0.458388	0.539455	-0.291003	Protein tweety homolog 3	TTYH3
24.3855	24.9497	24.8665	26.303	25.7053	25.626	27.2576	24.1459	23.6804	24.7983	24.5052	24.7466	NaN	23.0205	23.6754	24.2551	NaN	25.9005	0.457405	0.481231	0.62505	Tubulin alpha-1B chain	TUBA1B
NaN	NaN	NaN	NaN	NaN	NaN	23.4029	NaN	NaN	NaN	NaN	NaN	NaN	NaN	NaN	NaN	NaN	NaN	NaN	NaN	NaN	Tubulin alpha-1C chain	TUBA1C;TUBA1B
NaN	23.8159	24.1232	26.353	24.9629	25.1683	26.9802	23.6645	23.2939	24.1122	24.5702	23.23	NaN	23.8065	23.2347	NaN	NaN	24.2288	0.266713	0.639876	0.402894	Tubulin beta chain;Tubulin beta-2B chain;Tubulin beta-2A chain	TUBB;TUBB2B;TUBB2A
NaN	NaN	NaN	NaN	NaN	NaN	NaN	20.2099	NaN	NaN	NaN	NaN	NaN	NaN	NaN	NaN	NaN	NaN	NaN	NaN	NaN	Tubulin beta-1 chain	TUBB1
NaN	NaN	NaN	NaN	NaN	NaN	21.9631	NaN	NaN	NaN	NaN	NaN	NaN	NaN	NaN	NaN	NaN	NaN	NaN	NaN	NaN	Tubulin beta-3 chain	TUBB3
NaN	NaN	NaN	NaN	NaN	NaN	NaN	NaN	NaN	NaN	NaN	NaN	NaN	NaN	NaN	NaN	NaN	20.0128	NaN	NaN	NaN	Tubulin beta-4A chain	TUBB4A
NaN	NaN	NaN	NaN	NaN	NaN	23.6832	NaN	NaN	NaN	NaN	NaN	NaN	NaN	NaN	NaN	NaN	NaN	NaN	NaN	NaN	Tubulin beta-4B chain	TUBB4B
NaN	NaN	NaN	NaN	NaN	NaN	20.8704	NaN	NaN	NaN	NaN	NaN	NaN	NaN	NaN	NaN	NaN	NaN	NaN	NaN	NaN	Tubulin beta-6 chain	TUBB6
NaN	NaN	NaN	NaN	NaN	NaN	22.2223	NaN	NaN	NaN	NaN	NaN	NaN	NaN	NaN	NaN	NaN	NaN	NaN	NaN	NaN	Tubulin beta-8 chain;Tubulin beta-8 chain-like protein LOC260334	TUBB8
NaN	NaN	NaN	NaN	NaN	NaN	21.2263	NaN	NaN	NaN	NaN	NaN	NaN	NaN	NaN	NaN	NaN	NaN	NaN	NaN	NaN	Gamma-tubulin complex component 3	TUBGCP3
24.1441	23.3823	23.873	25.8123	25.822	25.2944	24.1013	22.9758	23.867	24.5305	24.415	24.7716	NaN	NaN	23.5255	22.7236	NaN	NaN	0.350287	0.564333	0.53113	Thioredoxin reductase 1, cytoplasmic	TXNRD1
NaN	21.2906	NaN	23.2822	20.5833	20.7554	24.9904	20.2041	NaN	22.5556	21.9321	22.0371	NaN	NaN	NaN	NaN	NaN	NaN	NaN	NaN	NaN	Ubiquitin-like modifier-activating enzyme 1	UBA1
25.9341	26.2246	27.6622	27.6972	27.1606	27.7564	27.2344	27.0283	26.7876	27.7368	27.4019	27.5197	24.4498	25.7055	25.4568	23.515	24.4123	24.4169	0.141431	0.813556	0.125918	Polyubiquitin-C;Ubiquitin;Ubiquitin-60S ribosomal protein L40;Ubiquitin;60S ribosomal protein L40;Ubiquitin-40S ribosomal protein S27a;Ubiquitin;40S ribosomal protein S27a;Polyubiquitin-B;Ubiquitin	UBC;UBB;RPS27A;UBA52
20.055	22.2258	20.9509	25.092	23.6845	24.246	28.4619	21.9984	20.7465	24.3619	22.03	21.4916	NaN	NaN	NaN	NaN	NaN	19.4437	0.221354	0.678506	0.501253	E3 ubiquitin-protein ligase UBR4	UBR4
NaN	NaN	NaN	22.8644	22.4991	22.7398	23.2493	21.737	21.7452	22.122	22.1601	NaN	NaN	NaN	NaN	22.7291	NaN	22.6345	0.321957	0.60547	0.366984	UDP-glucose:glycoprotein glucosyltransferase 1	UGGT1
24.4129	24.5888	25.1298	26.0737	25.6595	26.4281	25.754	24.4509	24.8207	25.7054	24.859	24.8933	23.0325	24.6571	23.5971	24.4105	23.6067	23.8827	1.0643	0.287381	0.563907	UTP--glucose-1-phosphate uridylyltransferase	UGP2
NaN	NaN	NaN	NaN	NaN	21.7999	23.1051	NaN	NaN	NaN	NaN	NaN	NaN	NaN	NaN	NaN	NaN	NaN	NaN	NaN	NaN	Probable ubiquitin carboxyl-terminal hydrolase FAF-X	USP9X
NaN	NaN	NaN	NaN	NaN	NaN	22.0913	NaN	NaN	NaN	NaN	NaN	NaN	NaN	NaN	NaN	NaN	NaN	NaN	NaN	NaN	Protein VAC14 homolog	VAC14
NaN	NaN	NaN	NaN	NaN	NaN	NaN	NaN	NaN	NaN	NaN	21.5165	NaN	NaN	NaN	NaN	NaN	NaN	NaN	NaN	NaN	Vesicle-associated membrane protein 3;Vesicle-associated membrane protein 2	VAMP2;VAMP3
NaN	NaN	NaN	NaN	NaN	NaN	20.9057	NaN	NaN	NaN	NaN	NaN	NaN	NaN	NaN	NaN	NaN	NaN	NaN	NaN	NaN	Valine--tRNA ligase	VARS
NaN	23.0499	23.2013	24.9597	NaN	22.5844	24.0149	22.8536	22.8522	23.597	23.0737	23.1216	NaN	NaN	NaN	NaN	NaN	NaN	NaN	NaN	NaN	Synaptic vesicle membrane protein VAT-1 homolog	VAT1
NaN	24.0571	24.2386	25.3932	25.4016	25.0141	24.2423	23.7068	23.7018	25.0441	24.6303	24.787	23.0457	NaN	NaN	23.5024	NaN	23.1141	1.70285	0.0725333	1.39038	Vinculin	VCL
28.0351	28.7023	28.1549	30.1809	29.3793	29.6714	30.2808	28.0995	27.4143	29.2372	28.7885	28.5092	25.6728	27.0378	27.7818	26.2802	24.8275	26.848	0.251923	0.675965	0.282539	Transitional endoplasmic reticulum ATPase	VCP
NaN	NaN	NaN	22.6132	NaN	NaN	NaN	NaN	NaN	NaN	NaN	NaN	NaN	NaN	NaN	NaN	NaN	NaN	NaN	NaN	NaN	Voltage-dependent anion-selective channel protein 1	VDAC1
24.5203	25.7921	24.1485	26.6313	25.5177	25.8609	27.922	24.39	NaN	23.7213	23.66	23.7582	NaN	24.9504	24.3913	25.5968	23.2386	25.5776	0.227284	0.677724	0.447041	Vimentin	VIM
NaN	NaN	NaN	NaN	NaN	NaN	NaN	NaN	20.0953	NaN	NaN	NaN	NaN	NaN	NaN	NaN	NaN	NaN	NaN	NaN	NaN	Very low-density lipoprotein receptor	VLDLR
NaN	NaN	NaN	21.7329	NaN	NaN	22.226	NaN	NaN	NaN	NaN	NaN	NaN	NaN	NaN	NaN	NaN	NaN	NaN	NaN	NaN	Vacuolar protein sorting-associated protein 18 homolog	VPS18
NaN	NaN	NaN	21.848	NaN	NaN	NaN	NaN	NaN	NaN	NaN	NaN	NaN	NaN	NaN	NaN	NaN	NaN	NaN	NaN	NaN	Vacuolar protein sorting-associated protein 28 homolog	VPS28
NaN	23.072	23.5827	24.7129	23.528	23.4358	24.3709	22.4655	22.3623	23.8501	23.3329	23.5838	NaN	NaN	NaN	NaN	NaN	NaN	NaN	NaN	NaN	Vacuolar protein sorting-associated protein 35	VPS35
NaN	NaN	NaN	NaN	NaN	NaN	NaN	NaN	NaN	NaN	19.3633	NaN	NaN	NaN	NaN	NaN	NaN	NaN	NaN	NaN	NaN	Vacuolar protein sorting-associated protein 4B	VPS4B
NaN	23.6632	NaN	NaN	NaN	NaN	NaN	NaN	NaN	NaN	NaN	NaN	NaN	NaN	NaN	NaN	NaN	NaN	NaN	NaN	NaN	V-set and immunoglobulin domain-containing protein 8	VSIG8
NaN	NaN	NaN	NaN	NaN	NaN	NaN	NaN	NaN	NaN	NaN	21.3591	NaN	NaN	NaN	NaN	NaN	NaN	NaN	NaN	NaN	Vitronectin;Vitronectin V65 subunit;Vitronectin V10 subunit;Somatomedin-B	VTN
NaN	NaN	NaN	NaN	NaN	NaN	NaN	20.5973	NaN	21.0456	NaN	NaN	NaN	NaN	NaN	NaN	NaN	NaN	NaN	NaN	NaN	von Willebrand factor A domain-containing protein 1	VWA1
NaN	21.4696	NaN	22.8323	NaN	22.0067	23.6739	NaN	NaN	22.9542	21.1924	21.9125	NaN	NaN	NaN	NaN	NaN	NaN	NaN	NaN	NaN	Tryptophan--tRNA ligase, cytoplasmic;T1-TrpRS;T2-TrpRS	WARS
NaN	23.4238	22.3062	26.2484	23.8225	24.2022	25.7474	21.4069	22.1083	24.9086	24.3201	24.2478	NaN	NaN	NaN	NaN	NaN	22.0964	1.32686	0.127608	1.46338	WD repeat-containing protein 1	WDR1
NaN	NaN	NaN	21.8025	21.0178	21.1408	22.9156	NaN	NaN	NaN	20.4363	NaN	NaN	NaN	NaN	NaN	NaN	NaN	NaN	NaN	NaN	WD repeat-containing protein 26	WDR26
NaN	22.2843	23.2785	23.202	22.7618	23.2073	23.4545	22.9735	22.5063	NaN	22.3341	22.387	NaN	NaN	22.7419	NaN	NaN	NaN	NaN	NaN	NaN	Protein Wnt-5a;Protein Wnt	WNT5A
NaN	NaN	NaN	NaN	NaN	NaN	20.0137	NaN	NaN	NaN	NaN	NaN	NaN	NaN	NaN	NaN	NaN	NaN	NaN	NaN	NaN	Protein Wnt-5b;Protein Wnt	WNT5B
NaN	NaN	NaN	NaN	NaN	NaN	NaN	NaN	NaN	NaN	NaN	NaN	NaN	NaN	NaN	NaN	NaN	27.9312	NaN	NaN	NaN	Xin actin-binding repeat-containing protein 2	XIRP2
NaN	NaN	NaN	22.3889	NaN	21.9711	23.4651	NaN	NaN	22.2729	22.0168	NaN	NaN	NaN	NaN	NaN	NaN	NaN	NaN	NaN	NaN	Exportin-1	XPO1
NaN	NaN	NaN	NaN	NaN	NaN	20.3478	NaN	NaN	NaN	NaN	NaN	NaN	NaN	NaN	NaN	NaN	NaN	NaN	NaN	NaN	Exportin-T	XPOT
NaN	NaN	NaN	22.0183	NaN	NaN	22.8429	NaN	NaN	NaN	NaN	NaN	NaN	NaN	NaN	NaN	NaN	22.2118	NaN	NaN	NaN	X-ray repair cross-complementing protein 5	XRCC5
NaN	NaN	NaN	NaN	NaN	NaN	22.5996	20.4129	NaN	NaN	NaN	NaN	NaN	NaN	NaN	NaN	NaN	NaN	NaN	NaN	NaN	X-ray repair cross-complementing protein 6	XRCC6
NaN	NaN	NaN	NaN	NaN	NaN	NaN	NaN	NaN	NaN	NaN	NaN	NaN	NaN	NaN	NaN	NaN	22.8363	NaN	NaN	NaN	Probable ATP-dependent RNA helicase YTHDC2	YTHDC2
NaN	21.5395	NaN	21.9188	NaN	NaN	NaN	NaN	NaN	NaN	21.3418	21.7925	NaN	NaN	NaN	NaN	NaN	NaN	NaN	NaN	NaN	14-3-3 protein epsilon	YWHAE
NaN	NaN	NaN	21.3904	NaN	NaN	22.5009	21.2495	NaN	NaN	NaN	NaN	NaN	NaN	NaN	NaN	NaN	NaN	NaN	NaN	NaN	14-3-3 protein gamma;14-3-3 protein gamma, N-terminally processed	YWHAG
NaN	NaN	22.8439	22.8736	NaN	22.2496	22.4145	21.8247	NaN	23.3124	22.8365	22.7397	NaN	NaN	NaN	NaN	NaN	NaN	NaN	NaN	NaN	14-3-3 protein zeta/delta	YWHAZ
NaN	NaN	NaN	NaN	NaN	NaN	NaN	NaN	NaN	NaN	NaN	NaN	NaN	NaN	NaN	NaN	NaN	23.2611	NaN	NaN	NaN	Zinc finger protein 90 homolog	ZFP90
NaN	NaN	NaN	NaN	NaN	NaN	20.9213	NaN	NaN	NaN	NaN	NaN	NaN	NaN	NaN	NaN	NaN	NaN	NaN	NaN	NaN	Zinc finger ZZ-type and EF-hand domain-containing protein 1	ZZEF1
NaN	NaN	NaN	NaN	NaN	NaN	NaN	21.5688	NaN	NaN	NaN	NaN	NaN	NaN	NaN	NaN	NaN	NaN	NaN	NaN	NaN
NaN	NaN	NaN	NaN	NaN	NaN	NaN	NaN	NaN	NaN	NaN	NaN	NaN	NaN	NaN	NaN	NaN	20.8385	NaN	NaN	NaN
NaN	24.328	NaN	NaN	NaN	NaN	NaN	NaN	NaN	NaN	NaN	NaN	NaN	NaN	NaN	NaN	NaN	NaN	NaN	NaN	NaN
30.4161	28.304	28.97	28.8313	29.1589	28.2273	28.7901	27.9404	28.1147	28.2117	28.6115	28.4444	30.4225	30.3945	29.6028	29.485	29.8474	29.2033	0.595013	0.465243	-0.326031
26.9512	25.2725	25.8792	25.6018	25.886	25.2566	25.1403	24.834	24.7266	24.724	24.9267	25.278	27.3395	27.5153	26.685	26.3154	26.5624	26.07	0.950455	0.353133	-0.413628
27.365	25.1692	25.8662	25.965	25.4994	26.1088	26.1366	24.2563	25.6455	25.2189	25.4601	25.6185	26.9783	27.4139	24.8275	NaN	25.9632	25.9942	0.484806	0.459598	-0.809126
26.7272	25.6721	26.2092	27.1644	27.6034	27.4066	26.916	26.0434	27.2135	26.9944	28.3887	27.3568	25.9942	26.9826	24.8026	25.6759	26.4895	26.7627	1.27404	0.195284	0.80907
NaN	NaN	NaN	NaN	NaN	NaN	NaN	NaN	22.7946	NaN	23.4052	NaN	NaN	NaN	NaN	NaN	NaN	NaN	NaN	NaN	NaN
23.9575	23.2879	23.5123	24.0271	24.6528	24.0296	NaN	23.1784	23.427	23.5426	23.8189	24.2355	24.603	24.9362	23.3952	24.2867	24.4833	24.1594	1.24001	0.229143	0.641163
25.6871	27.4927	24.8314	26.5019	26.4712	26.6596	26.0774	26.1817	27.0146	25.4553	27.9099	26.8801	26.1416	25.3698	24.9186	29.1923	28.719	28.9028	1.36045	0.127	1.44192
32.2913	30.0863	30.8469	30.9261	31.1754	30.6882	30.9334	29.816	29.9951	30.3017	30.2118	30.5922	31.9319	31.8432	31.3549	31.7515	32.0088	31.0156	0.0716609	0.928851	-0.0475218
NaN	21.3235	NaN	22.1078	22.7059	21.8229	22.0569	21.2678	22.1153	21.8946	22.6692	NaN	NaN	NaN	NaN	NaN	NaN	22.5978	NaN	NaN	NaN
33.6235	33.7255	34.3532	34.6016	35.0949	34.7337	33.3836	33.5514	34.7132	34.1567	34.8407	34.9142	33.6796	34.6156	33.2958	33.6457	33.7199	34.2471	1.30242	0.231494	0.556992
28.0735	26.7517	26.8517	27.3731	28.3248	27.177	27.3611	26.7854	28.0647	27.3329	28.0243	28.0881	28.6712	28.7444	27.1533	27.911	28.4663	28.4434	0.47291	0.532825	0.298184
23.5551	22.3466	NaN	NaN	23.4796	22.8769	22.7766	NaN	23.1281	22.5521	22.9383	23.4411	NaN	23.4663	NaN	22.8862	23.6963	23.3237	0.972335	0.259458	0.84806
NaN	22.38	NaN	NaN	22.6955	NaN	23.0454	22.6729	22.1058	NaN	23.0756	NaN	NaN	NaN	NaN	NaN	NaN	NaN	NaN	NaN	NaN
NaN	NaN	NaN	NaN	NaN	NaN	NaN	NaN	NaN	NaN	NaN	NaN	NaN	NaN	NaN	NaN	NaN	20.9067	NaN	NaN	NaN
NaN	NaN	NaN	NaN	NaN	NaN	NaN	NaN	NaN	NaN	21.8318	NaN	NaN	NaN	NaN	NaN	NaN	NaN	NaN	NaN	NaN
27.4551	26.6606	26.9387	27.8419	28.399	27.9617	27.3953	26.7951	27.9356	27.296	28.4353	28.2172	26.867	27.7854	26.3268	27.0268	27.3176	27.8074	1.45274	0.168688	0.682578
26.078	24.6189	26.2139	24.8751	26.1008	24.2644	24.0782	24.2041	23.7704	NaN	23.4338	24.8402	27.8825	27.5588	26.9985	NaN	26.5222	26.5205	0.818953	0.285306	-1.73023
NaN	23.8458	NaN	NaN	NaN	NaN	NaN	NaN	NaN	NaN	NaN	NaN	NaN	NaN	NaN	NaN	NaN	NaN	NaN	NaN	NaN
23.8657	23.4419	22.5096	25.8035	27.4344	26.9705	26.7827	NaN	24.4309	NaN	26.0644	24.4392	NaN	NaN	NaN	NaN	NaN	25.3118	NaN	NaN	NaN
33.8964	32.5205	33.4194	33.1278	33.4413	32.4905	32.4148	33.0471	33.1783	33.4137	33.1745	32.9548	34.2276	34.2862	34.0092	33.8498	34.2318	33.5285	0.149449	0.823046	-0.0874176
25.8921	23.88	24.3454	24.5237	25.0295	24.0598	24.3514	23.4682	23.9449	24.1071	24.8404	24.5879	25.8729	26.0025	24.8674	25.5815	25.9668	25.9933	0.330338	0.625179	0.229455
NaN	NaN	22.4807	22.836	23.432	24.3742	22.6446	21.5956	23.5388	23.1887	24.4626	22.9125	NaN	23.4893	NaN	21.842	NaN	22.3405	1.59898	0.0851765	1.49452
24.3457	22.7908	23.0664	22.8922	23.4435	NaN	23.4527	22.8282	22.8084	22.7505	23.0447	23.4437	24.6544	24.2441	23.9966	23.9365	24.838	24.2992	0.345053	0.611909	-0.244785
28.1322	26.2042	26.4572	26.6748	26.8317	25.952	26.8818	26.1336	25.8696	25.8647	25.9493	26.1955	28.3658	28.1619	27.5958	27.6997	27.9865	27.8488	0.693332	0.450148	-0.311007
26.1123	25.3373	25.513	26.5452	27.5796	28.3013	27.9567	22.8514	24.6005	23.2237	26.3267	24.6244	NaN	25.1534	NaN	25.9456	24.359	27.0212	0.78105	0.303723	1.8122
NaN	21.7513	22.381	23.2042	NaN	NaN	NaN	20.9661	NaN	NaN	NaN	NaN	NaN	NaN	NaN	NaN	NaN	22.0084	NaN	NaN	NaN
NaN	NaN	NaN	NaN	NaN	NaN	NaN	NaN	NaN	NaN	21.5824	NaN	NaN	NaN	NaN	NaN	NaN	NaN	NaN	NaN	NaN
23.6862	22.4709	NaN	24.1635	24.3164	24.442	24.4217	NaN	23.0197	NaN	23.4082	23.3949	NaN	25.2084	NaN	23.8907	NaN	24.052	0.502268	0.446484	0.97008
39.1534	37.4074	38.297	37.925	38.5437	37.7162	37.2882	37.0821	37.3353	37.4426	37.3482	37.8707	39.5003	39.5227	38.9628	39.1614	39.3222	38.5774	0.117222	0.863364	-0.0713209
NaN	NaN	NaN	NaN	NaN	NaN	NaN	NaN	NaN	NaN	NaN	NaN	NaN	NaN	NaN	NaN	NaN	21.9093	NaN	NaN	NaN
26.0012	26.2383	26.4102	27.3928	27.5913	27.3981	26.3857	26.5822	26.7089	27.0722	27.5365	27.9689	26.7081	27.3734	25.7869	26.8148	27.3563	27.4002	2.90604	0.0114286	0.926264
28.1268	28.2075	29.0729	28.8262	28.7672	29.221	28.7509	27.8504	28.131	27.0801	28.2287	28.2747	28.8909	29.1997	27.4179	28.4903	28.9113	29.2605	0.198527	0.73519	0.15688
25.625	25.847	26.3899	27.4946	26.5551	26.7799	27.8872	25.3078	26.0401	25.026	26.0808	26.3801	25.03	25.4292	24.0384	26.7888	26.2851	27.3102	0.719512	0.359685	0.789549
NaN	NaN	NaN	NaN	22.4089	NaN	NaN	NaN	NaN	NaN	NaN	NaN	NaN	NaN	22.09	NaN	NaN	22.3107	NaN	NaN	NaN
NaN	NaN	NaN	24.1125	25.1426	24.7246	23.72	NaN	22.3008	NaN	23.9516	22.6189	NaN	23.2811	NaN	22.9849	NaN	23.0906	1.31538	0.122174	1.96123
25.9234	23.9305	24.4328	24.8347	25.3599	24.7869	24.2831	23.4265	22.8343	23.3382	23.2795	24.7585	25.2597	25.6884	25.4681	25.5247	25.3839	25.5222	0.20872	0.732488	0.171319
29.1834	27.4462	28.2205	28.1089	28.6196	28.3919	27.9606	27.4877	27.4777	27.9431	28.2635	28.0083	29.333	29.7953	28.591	29.3656	29.706	29.2044	0.513917	0.538416	0.235112
32.571	31.8729	32.0139	32.3769	32.6221	32.0896	31.855	31.4293	31.6136	31.7506	32.1019	31.9745	32.7943	32.7438	32.3953	32.649	32.4807	32.6312	0.595956	0.56965	0.15415
23.618	21.5874	21.937	23.8168	23.9234	24.4264	23.0898	21.2667	22.3749	NaN	24.3994	23.2517	22.3276	23.0279	22.0177	22.0062	22.0058	21.9795	0.772367	0.352724	0.76929
NaN	NaN	NaN	NaN	NaN	NaN	NaN	NaN	NaN	NaN	20.2023	NaN	NaN	NaN	NaN	NaN	NaN	NaN	NaN	NaN	NaN
25.6621	24.4411	24.7118	25.2664	26.09	25.2034	25.4659	24.6135	24.8833	25.1825	25.4722	25.5529	25.8319	26.3562	25.0587	25.6132	26.0955	26.0824	0.850885	0.368928	0.392661
30.8588	29.4915	30.2098	30.4253	31.5388	30.8176	28.9115	29.5894	30.7448	30.2713	31.0379	31.1936	32.0975	32.2255	30.0637	31.3305	32.0336	31.3356	1.09781	0.254066	0.643519
NaN	22.8952	23.308	22.9551	24.2596	23.75	23.1766	22.296	22.8551	23.4794	24.1501	23.5141	NaN	24.0293	NaN	NaN	23.4912	23.7238	0.979905	0.266	0.853851
22.5423	NaN	22.3593	22.2504	22.8071	22.3952	21.5243	NaN	21.9427	NaN	23.4094	22.7621	22.9181	23.572	NaN	23.0303	23.4763	23.1088	0.804308	0.343055	0.811097
NaN	24.8657	NaN	NaN	NaN	NaN	NaN	NaN	NaN	NaN	NaN	NaN	NaN	NaN	NaN	NaN	NaN	NaN	NaN	NaN	NaN
24.6551	27.5237	29.6758	27.0175	27.0434	26.765	26.4196	26.967	28.0627	27.2664	27.8532	27.8169	25.4906	26.6357	23.3211	24.6629	25.7372	26.9781	0.159878	0.753802	0.265499
26.5983	27.1714	26.9622	27.8435	28.2027	27.8421	27.5192	27.1658	27.7223	27.6213	28.3505	27.9176	26.9692	27.9666	26.4555	27.0342	27.1981	27.8217	1.39514	0.205408	0.589023
25.5227	23.9235	24.3448	24.837	25.7211	25.0459	24.6474	24.0499	24.5902	24.6393	25.0785	25.3068	26.1621	26.1813	25.4169	25.9984	25.9072	25.9964	0.833816	0.373471	0.410185
21.5012	22.0529	22.6488	23.3531	23.103	23.4307	22.2791	22.4673	22.9665	22.9014	24.6041	23.4356	21.8993	22.7573	NaN	NaN	NaN	21.8254	0.313498	0.600991	0.395137
NaN	24.508	NaN	24.3359	25.4324	25.6914	NaN	24.7169	26.0081	25.1278	26.7283	25.4544	NaN	NaN	NaN	NaN	23.4395	25.0013	2.50148	0.0028	2.47824
NaN	22.9596	24.2356	23.8941	24.9358	24.2378	24.3529	NaN	23.4317	22.8818	23.5863	23.7618	NaN	NaN	NaN	NaN	23.4144	23.9733	1.40176	0.113333	1.68629
21.2708	25.7541	28.3835	24.1926	24.2505	23.7977	24.1239	24.0377	25.8953	23.2129	24.4838	25.1258	NaN	24.291	NaN	NaN	22.6593	23.1805	0.0321299	0.958913	-0.0814364
NaN	NaN	NaN	NaN	NaN	NaN	NaN	NaN	NaN	NaN	21.5033	NaN	NaN	NaN	NaN	NaN	NaN	NaN	NaN	NaN	NaN
NaN	21.8643	22.6186	22.1073	22.2026	22.9209	22.5654	21.2972	21.9554	NaN	21.7189	22.1785	NaN	22.2398	NaN	NaN	NaN	NaN	NaN	NaN	NaN
NaN	NaN	NaN	22.0766	NaN	NaN	NaN	NaN	NaN	NaN	21.9754	NaN	NaN	22.9282	NaN	NaN	NaN	22.3206	NaN	NaN	NaN
NaN	NaN	NaN	NaN	NaN	22.6072	NaN	NaN	NaN	NaN	23.5582	NaN	NaN	NaN	NaN	NaN	NaN	NaN	NaN	NaN	NaN
29.2629	28.865	30.5058	29.5119	30.1986	29.8491	28.5512	28.5025	29.7831	29.1874	30.1753	30.0129	29.8981	30.2082	28.265	29.4239	29.9503	29.9252	0.850585	0.352571	0.488112
24.3865	23.191	23.5672	24.1104	24.8909	24.4875	23.4895	22.9373	24.5585	23.2429	24.8206	24.2919	25.1078	24.7736	23.2243	24.9495	25.2362	25.1203	1.12412	0.254965	0.657152
22.6984	27.9125	30.3365	26.2895	24.3386	23.98	25.9877	26.0631	27.2983	24.2269	25.4294	27.2604	NaN	21.8988	NaN	20.4448	NaN	19.8815	0.646015	0.365606	-1.20572
28.5542	26.3852	27.319	27.1662	27.5048	26.5429	26.9745	26.389	26.0752	NaN	NaN	26.7479	28.0815	27.9394	27.3957	28.0807	28.3435	27.3281	0.723377	0.35414	-1.09268
26.8629	27.4126	27.8294	28.6745	28.9611	28.7418	28.7148	26.035	27.2526	26.0969	28.211	27.5266	26.417	27.3585	25.8377	27.2571	26.2559	28.6539	0.642377	0.388028	0.739809
24.5641	23.9223	23.9604	24.3286	25.0249	24.3977	23.5446	23.3892	23.901	24.0601	24.6077	24.3716	24.6638	24.6847	24.226	24.6634	24.6055	24.8794	1.57516	0.211514	0.453641
26.3159	25.3028	25.8315	26.0653	26.8985	26.2161	24.58	25.246	26.1186	25.6476	26.8663	26.4074	27.8383	27.9154	25.768	27.1196	27.895	26.8879	1.12439	0.259916	0.565252
NaN	22.5708	NaN	23.3272	NaN	23.1631	23.2281	22.3147	23.5151	22.6823	22.9156	23.2683	NaN	NaN	NaN	22.5638	NaN	23.7004	1.42759	0.123404	1.21137
30.9209	28.5581	29.1768	28.8259	29.3857	29.0137	29.3382	28.5585	27.9075	28.618	28.4589	28.418	30.996	30.4808	30.4611	30.6105	30.8457	29.9717	0.391448	0.588682	-0.249965
24.9243	24.4639	24.9512	24.801	25.0986	24.6766	25.317	24.7586	25.1976	24.8913	25.7087	25.3011	25.2488	25.7646	24.2572	24.6409	25.5419	25.2482	0.233513	0.738752	0.113921
24.0976	24.2416	24.3576	24.5933	25.092	25.5459	24.4653	23.5748	24.8992	24.0097	25.8245	24.831	23.3257	25.0029	NaN	NaN	24.119	24.8997	0.387352	0.537143	0.546921
26.3087	25.8614	26.0139	26.9437	27.8418	27.333	25.2716	26.0645	27.169	26.685	27.651	27.6736	27.4723	27.6099	25.9018	26.7042	27.2126	26.8042	1.51274	0.14	0.797355
24.6515	23.746	24.2765	25.5445	25.5542	25.2785	25.9323	NaN	24.5423	NaN	25.583	24.9924	NaN	24.913	NaN	NaN	NaN	24.677	NaN	NaN	NaN
NaN	NaN	NaN	22.3628	NaN	NaN	22.912	NaN	NaN	NaN	22.232	22.2572	NaN	24.2484	NaN	NaN	24.2318	NaN	NaN	NaN	NaN
NaN	NaN	NaN	NaN	NaN	NaN	NaN	NaN	21.3996	NaN	22.0011	NaN	NaN	21.1273	NaN	NaN	NaN	20.4914	NaN	NaN	NaN
NaN	NaN	NaN	NaN	NaN	NaN	NaN	NaN	NaN	NaN	23.0201	NaN	NaN	NaN	NaN	NaN	NaN	NaN	NaN	NaN	NaN
26.6927	27.1409	27.1468	27.01	27.6244	27.5895	27.8867	27.0896	27.4886	26.2555	27.252	27.097	27.7178	27.6105	25.7384	27.4465	27.653	28.2603	0.206278	0.733607	0.186241
30.0563	28.1508	28.5792	28.5953	28.9242	27.9774	28.5448	28.2205	28.1894	28.53	28.5572	28.4052	30.0066	30.0594	28.5529	28.7084	29.4517	28.342	0.628516	0.465294	-0.318744
28.8364	26.6396	27.2311	26.965	27.5554	26.6164	26.6853	26.2388	26.244	26.5715	26.3081	26.5314	28.4351	28.612	28.2361	27.4987	28.0746	27.1349	0.808333	0.367252	-0.433626
25.9143	23.416	24.5667	24.0671	24.8676	24.029	23.9566	23.3366	23.6562	23.6511	23.9165	24.3817	25.5725	25.801	25.0556	25.3894	25.8875	24.8606	0.0281153	0.967671	-0.0250094
NaN	27.4324	NaN	NaN	NaN	NaN	NaN	NaN	NaN	NaN	NaN	NaN	NaN	NaN	NaN	NaN	NaN	NaN	NaN	NaN	NaN
NaN	NaN	NaN	NaN	NaN	NaN	NaN	NaN	NaN	NaN	19.9576	NaN	NaN	NaN	NaN	NaN	NaN	NaN	NaN	NaN	NaN

## Sheet: Table S3
Table S3: Gene set enrichment analysis of 11 proteins differentially abundant in NF- vs. CAF‑EXOs in patients 1-3. GO terms summarized as adhesion related: Biological adhesion [GO:0022610], Cell substrate adhesion [GO:0031589], Regulation of cell substrate adhesion [GO:0010810], Negative regulation of cell substrate adhesion [GO:0010812], Substrate adhesion dependent cell spreading [GO:0034446], …
protein	Hallmark epithelial to mesenchymal transition	KEGG focal adhesion	GO terms
			adhesion related	extracellular matrix related
THBS1	X	X	7 / 10	6 / 7
FBLN1	X		9 / 10	5 / 7
LAMB2		X	4 / 10	6 / 7
COL14A1			1 / 10	4 / 7
EDIL3	X		5 / 10	4 / 7
IGFBP7			1 / 10	3 / 7
MMP3	X		-	2 / 7
QSOX1	X		-	2 / 7
ACTN4		X	10 / 10	1 / 7
SVEP1			1 / 10	-
PAMR1			-	-
Abbreviations: CAF: cancer-associated fibroblast; EXOs: exosomes; GO: gene ontology; NF: normal fibroblast.

## Sheet: Table S4
Table S4: Patient characteristics of an independent pEXO test cohort.
			Vascular Disease (VD)	Colorectal Carcinoma (CRC)
	total cases		18	48
	gender (m/f)		14 / 4	33 / 15
	age (mean)		58-84 (72.2)	38-92 (66.9)
primary cancer localisation	Cecum		-	4
	C. ascendens		-	15
	C. transversum		-	3
	C. descendens		-	4
	C. sigmoideum		-	7
	Rectosigmoid junction		-	1
	Rectum		-	14
T stage	T0		-	2
	T1		-	1
	T2		-	8
	T3		-	28
	T4		-	8
N stage	N0		-	21
	N1		-	15
	N2		-	11
UICC stage	0		-	2
	I		-	7
	II		-	7
	III		-	7
	IV		-	24
Abbreviations: c.: colon; CRC: colorectal cancer; f: female; m: male; N: nodule stage; pEXO: plasma-derived; exosomes; T: tumour stage; UICC: Union internationale contre le cancer; VD: vascular disease.

## Sheet: Table S5
Table S5. Overview on current knowledge on fibroblast activity related EXO proteins identified by mass spectrometry.
	implicated in			associated to		regulation upon tumorigenesis / tumor progression
protein	tumor growth	angiogenesis	metastasis	fibroblasts	EVs
FBLN1	promoting (HepC) [62] / inhibiting (BlC) [63]	inhibiting (BlC) [63]	inhibiting (PrC) [71], (BlC) [63]	lung [81], PrC [82]	blood [88,89]	reduced (CRC) [45,46]
MMP3	promoting [64], (CRC) [65]	-	promoting (GaC) [72], (CRC) [65]	CRC [83]	[64,72]	induced (CRC) [47,49]; induced in stroma (CRC) [48]
QSOX1	promoting (BrC) [54] / inhibiting (BrC) [70]	inhibiting [78]	promoting (PrC) [77], (LuC) [55]	CRC [85]	Cow milk [92]	induced (LuC) [55]; induced in stroma (BrC) [54]
ACTN4	promoting (PaC) [66]	-	promoting (CRC) [73], (LuC) [74], (PaC) [66]	lung [84]	PaC [66]	induced (CRC) [50,51]
THBS1	inhibiting (CRC) [67,68]	inhibiting (CRC) [79,80]	inhibiting (CRC) [67] / promoting (CRC) [75]	CRC [80,85,86]	LuC [90]	reduced (CRC) [52]
EDIL3	promoting (CRC) [69]	promoting (CRC) [69]	promoting (BrC) [76]	CRC [85], PaC [87]	BrC [76], BlC [91]	induced (CRC) [53]
Abbreviations: BlC – bladder cancer, BrC – breast cancer, CRC – colorectal cancer, GaC – gastric cancer, HepC – Hepatocellular carcinoma, LuC – lung cancer, PaC – pancreatic cancer, PrC – prostate cancer.
